# Supplementary material for: Palladium-catalyzed C8–H alkoxycarbonylation of 1-naphthylamines with alkyl chloroformates
Source: Royal Society of Chemistry journal article supplement (doi:10.1039/d0ob00586j), 2020-01-01

## Supporting Information

### Palladium-Catalyzed C8-H Alkoxy carbonylation of 1-Naphthylamines with Alkyl chloroformates

Yaqi Shi,<sup>†</sup> Fan Yang,<sup>\*,†</sup> and Yangjie Wu<sup>\*,†</sup>

<sup>†</sup>College of Chemistry, Green Catalysis Center, Henan Key Laboratory of Chemical Biology and Organic Chemistry, Key Laboratory of Applied Chemistry of Henan Universities, Zhengzhou University, Zhengzhou 450052, PR China

E-mail: yangf@zzu.edu.cn; wyj@zzu.edu.cn

#### Table of Contents

|                                                                                   |            |
|-----------------------------------------------------------------------------------|------------|
| <b>1. General Information</b>                                                     | <b>S2</b>  |
| <b>2. Optimization of Reaction Conditions</b>                                     | <b>S2</b>  |
| <b>3. Experimental Section</b>                                                    | <b>S3</b>  |
| 3.1. Typical procedure for the synthesis of substrate 1a                          |            |
| 3.2. Typical procedure for the product 3aa                                        |            |
| 3.3. Typical procedure for the product 4a                                         |            |
| 3.4. Typical procedure for the product 8a                                         |            |
| 3.5. The experiment of trapping the radicals                                      |            |
| 3.6. Kinetic isotope effect measurements                                          |            |
| <b>4. Characterization Data of the Products</b>                                   | <b>S8</b>  |
| <b>5. References</b>                                                              | <b>S18</b> |
| <b>6. The Single Crystal X-ray Diffraction Study of 3na</b>                       | <b>S18</b> |
| <b>7. Copies of <sup>1</sup>H and <sup>13</sup>C NMR Spectra for the Products</b> | <b>S20</b> |

## 1. General Information

<sup>1</sup>H NMR and <sup>13</sup>C NMR spectra were recorded on a Bruker DPX-400 spectrometer with CDCl<sub>3</sub> as the solvent and TMS as an internal standard. Melting points were measured using a WC-1 microscopic apparatus and are uncorrected. High resolution mass spectra were ensured on an Agilent Technologies 1290-6540 UHPLC/Accurate-Mass Quadrupole Time-of-Flight LC/MS. All solvents were used directly without further purification. Dichloromethane, ethyl acetate, and hexane were used for column chromatography. The commercials were obtained from commercial sources and used as-received without further purification unless otherwise noted.

## 2. Optimization of Reaction Conditions

Table S1. Optimization of Solvent and Catalyst<sup>a</sup>

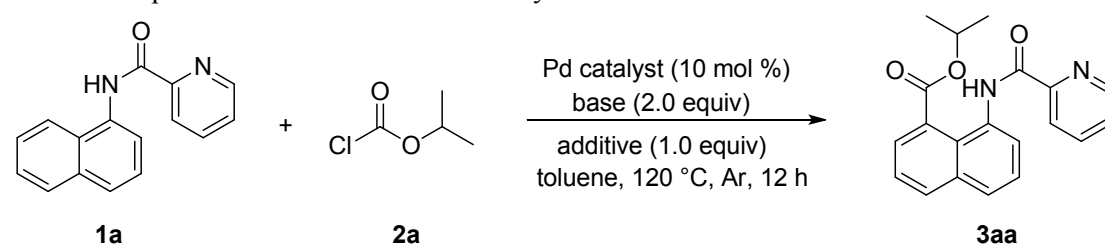

| Entry | catalyst                                            | solvent            | yield <sup>b</sup> |
|-------|-----------------------------------------------------|--------------------|--------------------|
| 1     | Pd(OAc) <sub>2</sub>                                | DCE                | 0%                 |
| 2     | Pd(OAc) <sub>2</sub>                                | CH <sub>3</sub> CN | 0%                 |
| 3     | Pd(OAc) <sub>2</sub>                                | toluene            | 57%                |
| 4     | Pd(OAc) <sub>2</sub>                                | DMSO               | 0%                 |
| 5     | Pd(OAc) <sub>2</sub>                                | 1,4-dioxane        | 0%                 |
| 6     | Pd(OAc) <sub>2</sub>                                | CH <sub>3</sub> OH | 0%                 |
| 7     | Pd(OAc) <sub>2</sub>                                | DMF                | 0%                 |
| 8     | Pd(OAc) <sub>2</sub>                                | actone             | 0%                 |
| 9     | Cu(OAc) <sub>2</sub>                                | toluene            | 0%                 |
| 10    | Co(OAc) <sub>2</sub>                                | toluene            | 0%                 |
| 11    | NiCl <sub>2</sub>                                   | toluene            | 0%                 |
| 12    | FeCl <sub>3</sub>                                   | toluene            | 0%                 |
| 13    | RuCl <sub>2</sub> ( <i>p</i> -cymene) <sub>2</sub>  | toluene            | 0%                 |
| 14    | PdCl <sub>2</sub>                                   | toluene            | 43%                |
| 15    | Pd(TFA) <sub>2</sub>                                | toluene            | 45%                |
| 16    | Pd(CH <sub>3</sub> CN) <sub>2</sub> Cl <sub>2</sub> | toluene            | 32%                |
| 17    | Pd <sub>2</sub> dba <sub>3</sub>                    | toluene            | 0%                 |
| 18    | PdI <sub>2</sub>                                    | toluene            | 26%                |

<sup>a</sup> Reaction conditions: **1a** (0.1 mmol), **2a** (3.0 equiv), catalysts (10 mol %), NaOAc (2.0 equiv) in solvent (1.0 mL) at 120 °C under argon for 12 h. <sup>b</sup> Isolated yield.

Table S2. Optimization of Base and Additive<sup>a</sup>

| Entry             | base                             | additive           | yield <sup>b</sup> |
|-------------------|----------------------------------|--------------------|--------------------|
| 1                 | NaHCO <sub>3</sub>               | -                  | 18%                |
| 2                 | Na <sub>2</sub> CO <sub>3</sub>  | -                  | 40%                |
| 3                 | KOAc                             | -                  | 75%                |
| 4                 | K <sub>2</sub> CO <sub>3</sub>   | -                  | 43%                |
| 5                 | Na <sub>3</sub> PO <sub>4</sub>  | -                  | 41%                |
| 6                 | Na <sub>2</sub> HPO <sub>4</sub> | -                  | 35%                |
| 7                 | NaH <sub>2</sub> PO <sub>4</sub> | -                  | 22%                |
| 8                 | PivONa                           | -                  | 0%                 |
| 9                 | Cs <sub>2</sub> CO <sub>3</sub>  | -                  | 0%                 |
| 10                | pyridine                         | -                  | 0%                 |
| 11                | DBU                              | -                  | 0%                 |
| 12                | NEt <sub>3</sub>                 | -                  | 0%                 |
| 13                | <sup>t</sup> BuONa               | -                  | 47%                |
| 14                | EtONa                            | -                  | 44%                |
| 15                | NaOAc                            | I <sub>2</sub>     | 0%                 |
| 16                | NaOAc                            | NaI                | 81%                |
| 17                | NaOAc                            | KI                 | 73%                |
| 18                | NaOAc                            | AgSbF <sub>6</sub> | 16%                |
| 19 <sup>c</sup>   | NaOAc                            | NaI                | 68%                |
| 20 <sup>d</sup>   | NaOAc                            | NaI                | 72%                |
| 21 <sup>e</sup>   | NaOAc                            | NaI                | 88%                |
| 19 <sup>e,f</sup> | NaOAc                            | NaI                | 48%                |
| 20 <sup>e,g</sup> | NaOAc                            | NaI                | 77%                |

<sup>a</sup> Reaction conditions: **1a** (0.1 mmol), **2a** (3.0 equiv), Pd(OAc)<sub>2</sub> (10 mol %), base (2.0 equiv) and additive (1.0 equiv) in toluene (1.0 mL) at 120 °C under argon for 12 h. <sup>b</sup> Isolated yield. <sup>c</sup> At a additive loading of 30 mol %. <sup>d</sup> At a additive loading of 50 mol %. <sup>e</sup> Pd(OAc)<sub>2</sub> (15 mol %). <sup>f</sup> At 100 °C. <sup>g</sup> Under air.

### 3. Experimental Section

#### 3.1. Typical procedure for the synthesis of substrate **1a**

A 100 mL two-necked round-bottom flask was equipped with a magnetic stir bar and charged with 1-naphthylamine (20 mmol, 2.86 g), picolinic acid (1.1 equiv, 2.70 g), N,N-dimethyl-4-aminopyridine (DMAP, 0.1 equiv, 0.244 g) in 30 mL anhydrous CH<sub>2</sub>Cl<sub>2</sub> at 0 °C. After EDCI (4.20 g, 1.1 equiv) in CH<sub>2</sub>Cl<sub>2</sub> (20 mL) was added dropwise to the solution under a nitrogen atmosphere, the reaction was then warmed to room temperature, stirred for 12 h and quenched with water (30 mL). The reaction mixture was extracted with CH<sub>2</sub>Cl<sub>2</sub> (3 × 20 mL), and the combined organic

solvent was dried over Na<sub>2</sub>SO<sub>4</sub>, filtered and concentrated under reduced pressure. The resulting residue was purified by column chromatography (hexane/ethyl acetate = 3:1) (V/V) to afford the pure product **1a** as a white solid (4.42 g, 89%).

All amides were prepared from the corresponding 1-naphthylamine derivatives and 2-picolinic acid according to the reported procedure.<sup>1</sup>

### 3.2. Typical procedure for the product **3aa**

A Schlenk tube was equipped with a magnetic stir bar and charged with N-(naphthalen-1-yl)picolinamide **1a** (0.1 mmol, 24.8 mg), **2a** (0.3 mmol, 41 μL), NaOAc (0.2 mmol, 16 mg), Pd(OAc)<sub>2</sub> (0.015 mmol, 3.3 mg), NaI (0.1 mmol, 15 mg) in toluene (1.0 mL). The resulting mixture was sealed under argon, heated at 120 °C for 12 h, and cooled to room temperature. Upon completion, CH<sub>2</sub>Cl<sub>2</sub> (20 mL) was added to the reaction system, and the resulting mixture was filtered through a pad of Celite. After the organic material was concentrated in vacuum, the product was purified by column chromatography on silica gel (100–200 mesh) using hexane/EtOAc as an eluent (5:1, V/V) to afford the pure product **3aa**.

### 3.3. Typical procedure for the product **4a**

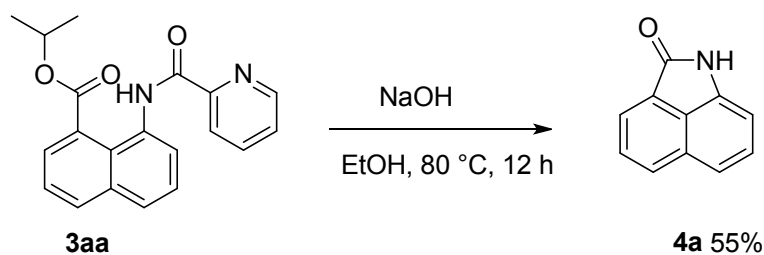

A mixture of **3aa** (66.8 mg, 0.2 mmol, 1.0 equiv) and NaOH (240 mg, 6 mmol, 30 equiv) was heated in ethanol (3.0 mL) for 12 h at 80 °C. After the mixture was cooled to room temperature and diluted with water (3.0 mL), the solution of diluted hydrochloric acid was added until it was acidic. The saturated NaHCO<sub>3</sub> solution was then added until the pH value was about 7. The mixture was then extracted with CH<sub>2</sub>Cl<sub>2</sub> and dried over anhydrous Na<sub>2</sub>SO<sub>4</sub>. After the organic material was concentrated in vacuum, the product was purified by column chromatography on silica gel (100–200 mesh) using hexane/EtOAc as an eluent (3:1, V/V) to afford the pure product **4a**.

### 3.4. Typical procedure for the product **8a**

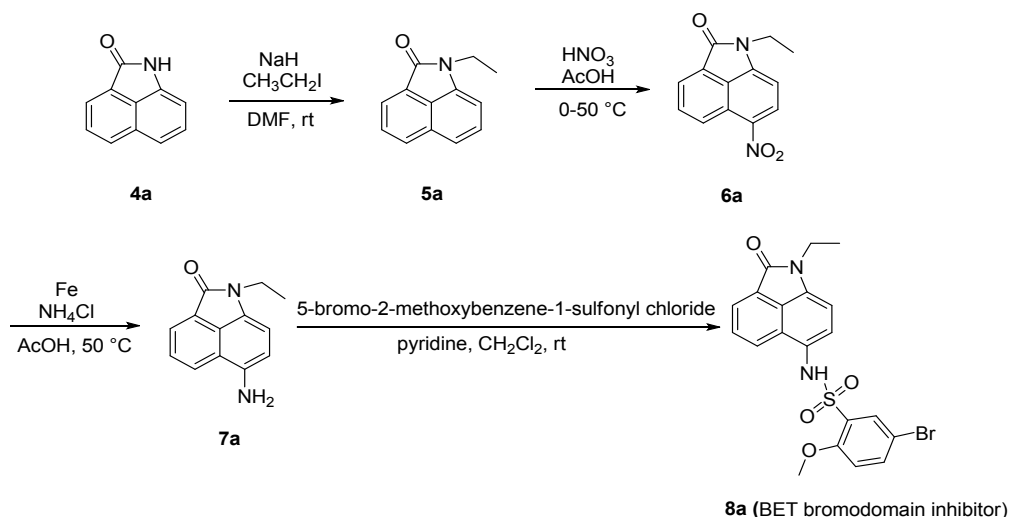

To a solution of **4a** (169 mg, 1.0 mmol, 1.0 equiv) in DMF (2.5 mL), NaH (36 mg, 1.5 mmol, 1.5 equiv) was added at 0 °C. After stirred for 10 min at 0 °C, iodoethane (96  $\mu$ L, 1.2 mmol, 1.2 equiv) was added dropwise into the solution and the reaction mixture was stirred at room temperature. After the reaction was completed, the resulting mixture was poured into H<sub>2</sub>O and extracted with ethyl acetate. The organic material was dried over Na<sub>2</sub>SO<sub>4</sub> and concentrated in vacuum, and the product was purified by column chromatography on silica gel (100–200 mesh) using hexane/EtOAc as an eluent (5:1, V/V) to afford the pure product **5a**.

To a solution of **5a** (189 mg, 0.96 mmol, 1.0 equiv) in AcOH (2.5 mL), HNO<sub>3</sub> (61 mg, 0.96 mmol, 1.0 equiv) was added at 0 °C and then the reaction mixture was stirred at 50 °C for 1 h. After the reaction was completed, the reaction mixture was cooled to room temperature. The mixture was extracted with ethyl acetate, dried over anhydrous Na<sub>2</sub>SO<sub>4</sub> and concentrated in vacuo, and the product was purified by column chromatography on silica gel (100–200 mesh) using hexane/EtOAc as an eluent (5:1, V/V) to afford the pure product **6a**.

A mixture of iron powder (179 mg, 3.2 mmol, 5.0 equiv) and NH<sub>4</sub>Cl (68 mg, 1.28 mmol, 2.0 equiv) in a mixture of AcOH/water (2 mL/8 mL) was heated at 50 °C for 5 min. Subsequently, **6a** (155 mg, 0.64 mmol, 1.0 equiv) was dissolved in DMF (2 mL) and added to the reaction mixture. After completion, the mixture was cooled to room temperature, extracted with ethyl acetate. After the organic layer was washed with brine, dried over Na<sub>2</sub>SO<sub>4</sub> and filtered, the filtrate was concentrated in vacuo. The product was purified by column chromatography on silica gel (100–200 mesh) using hexane/EtOAc as an eluent (3:1, V/V) to afford the pure product **7a**.

A mixture of **7a** (105 mg, 0.5 mmol, 1.0 equiv) and 5-bromo-2-methoxybenzenesulfonyl chloride (170 mg, 0.6 mmol, 1.2 equiv) in CH<sub>2</sub>Cl<sub>2</sub> (10 mL) was added in pyridine (0.5 mL) and stirred at room temperature for 2 h. The mixture was extracted with CH<sub>2</sub>Cl<sub>2</sub>, and the organic layer was washed with brine, dried over anhydrous Na<sub>2</sub>SO<sub>4</sub> and filtered. The filtrate was concentrated in vacuo, and the product was purified by column chromatography on silica gel (100–200 mesh) using hexane/EtOAc as an eluent (2:1, V/V) to afford the pure product **8a**.<sup>2</sup>

### 3.5. The experiment of trapping the radicals

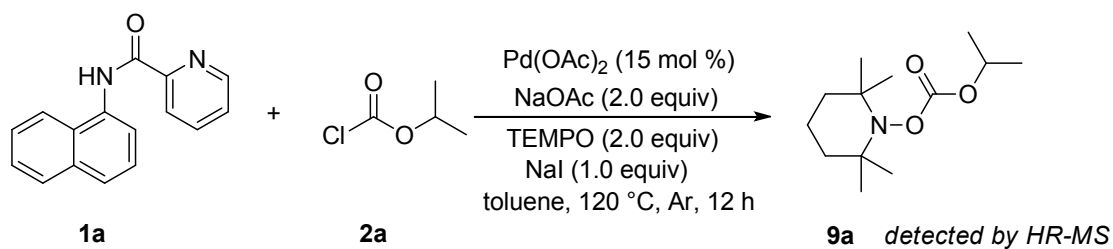

HRMS (ESI<sup>+</sup>): calcd for C<sub>13</sub>H<sub>26</sub>NO<sub>3</sub> [M+H]<sup>+</sup>: 244.1907, found: 244.1908.

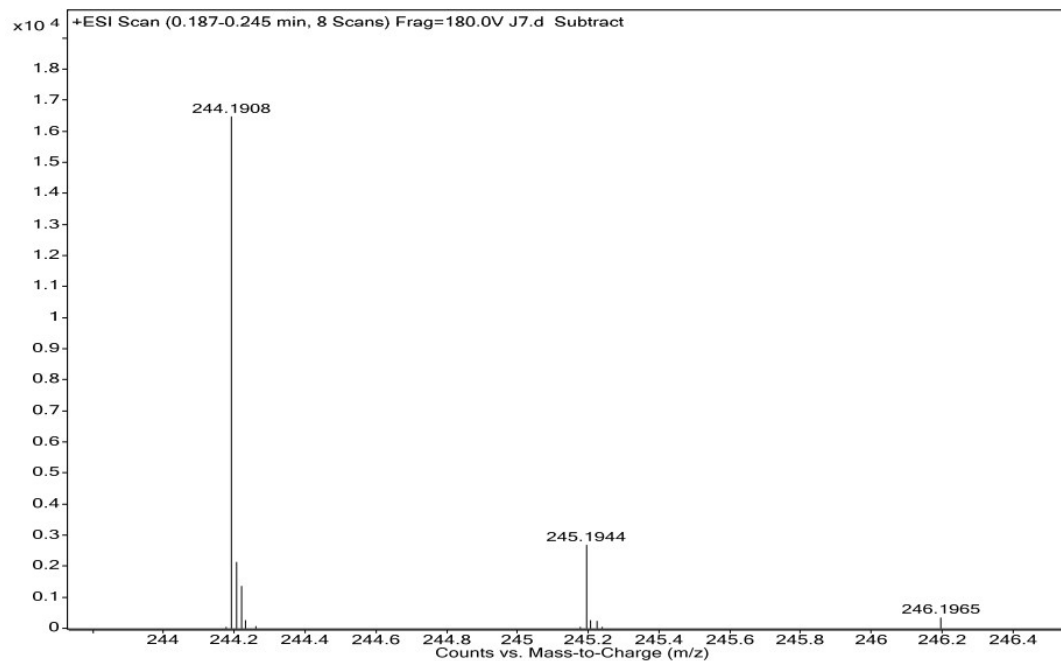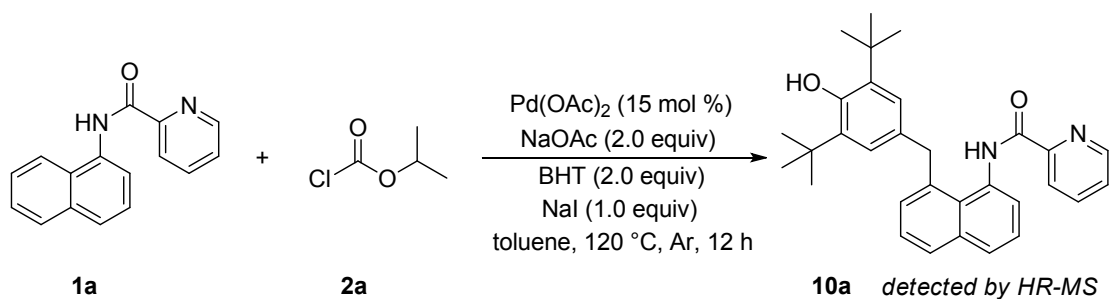

HRMS (ESI<sup>+</sup>): calcd for C<sub>31</sub>H<sub>35</sub>N<sub>2</sub>O<sub>2</sub> [M+H]<sup>+</sup>: 467.2693, found: 467.2692.

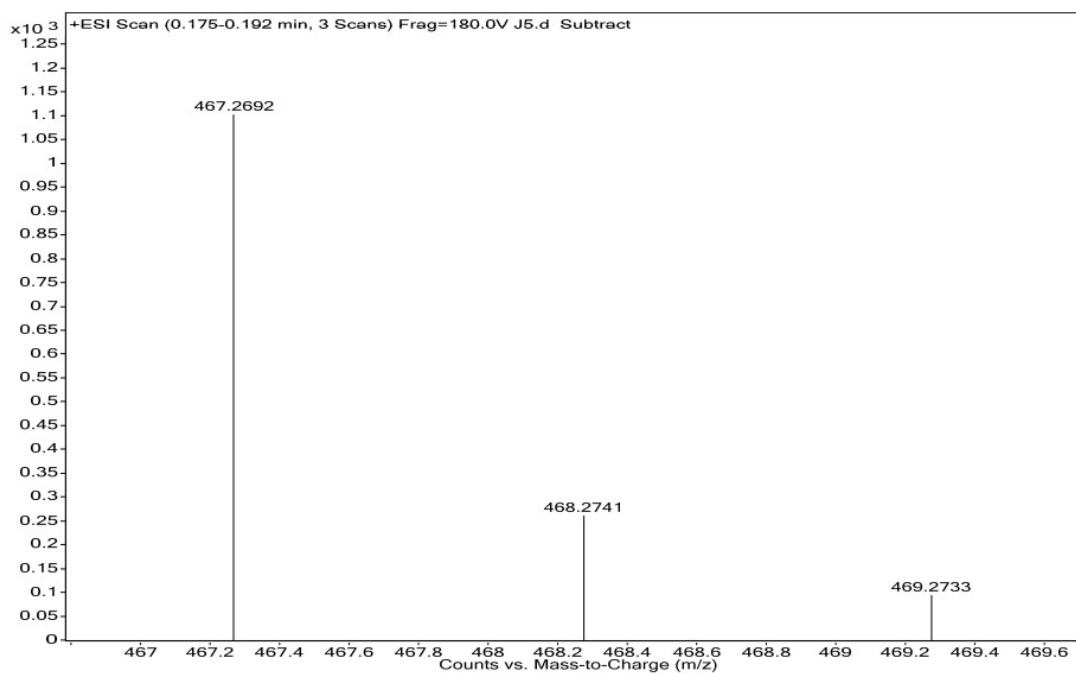

### 3.6. Kinetic isotope effect measurements

A Schlenk tube was equipped with a magnetic stir bar and charged with N-(naphthalen-1-yl)picolinamide **1a** (0.05 mmol, 12.4 mg), **1a-d<sub>1</sub>** (0.05 mmol, 12.4 mg), **2a** (0.3 mmol, 41  $\mu$ L), NaOAc (0.2 mmol, 16 mg), Pd(OAc)<sub>2</sub> (0.015 mmol, 3.3 mg), NaI (0.1 mmol, 15 mg) in toluene (1.0 mL). The resulting mixture was sealed under Ar, heated at 120 °C for 1 h and cooled to room temperature. Upon completion, CH<sub>2</sub>Cl<sub>2</sub> (20 mL) was added to the reaction system, and the resulting mixture was filtered through a pad of Celite. After the organic material was concentrated in vacuum, the product was purified by column chromatography on silica gel (100–200 mesh) using hexane/EtOAc as an eluent (5:1, V/V) to afford the pure product **1a/1a-d<sub>1</sub>**, and then analyzed by <sup>1</sup>H NMR spectrum. The KIE value was calculated as  $k_H/k_D = 0.3$ .

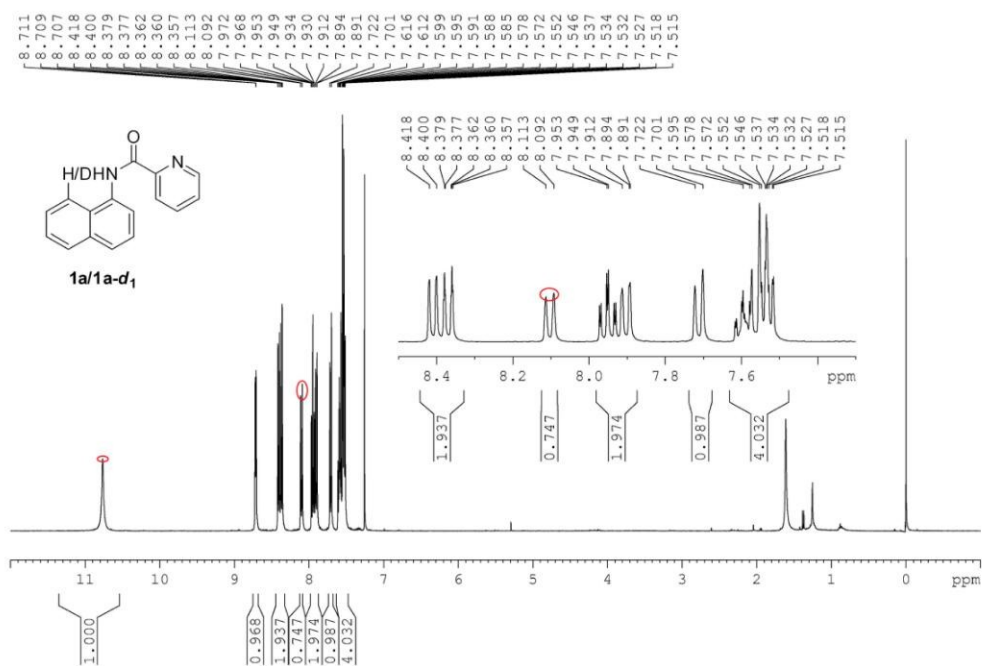

#### 4. Characterization Data of the Products

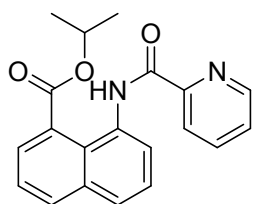

Isopropyl 8-(picolinamido)-1-naphthoate, **3aa**: yellow solid (29.4 mg, 88%); mp 110-112 °C;  $^1\text{H}$  NMR (400 MHz,  $\text{CDCl}_3$ )  $\delta$  10.37 (s, 1H), 8.72-8.70 (m, 1H), 8.30-8.28 (m, 1H), 7.98 (dd,  $J_1 = 8.24$  Hz,  $J_2 = 1.12$  Hz, 1H), 7.92-7.88 (m, 2H), 7.84 (d,  $J = 7.20$  Hz, 1H), 7.67-7.62 (m, 2H), 7.49-7.45 (m, 2H), 5.15-5.09 (m, 1H), 1.20 (d,  $J = 6.28$  Hz, 6H);  $^{13}\text{C}$  NMR (100 MHz,  $\text{CDCl}_3$ )  $\delta$  170.8, 163.5, 150.2, 148.1, 137.5, 135.1, 131.9, 131.7, 129.4, 128.3, 127.5, 126.7, 126.5, 126.4, 125.7, 124.6, 122.8, 69.5, 21.6; HRMS (ESI $^+$ ): calcd for  $\text{C}_{20}\text{H}_{19}\text{N}_2\text{O}_3$   $[\text{M}+\text{H}]^+$ : 335.1390, found: 335.1391.

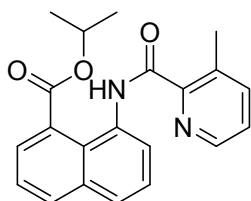

Isopropyl 8-(3-methylpicolinamido)-1-naphthoate, **3ba**: colorless solid (14.3 mg, 41%); mp 113-115 °C;  $^1\text{H}$  NMR (400 MHz,  $\text{CDCl}_3$ )  $\delta$  10.39 (s, 1H), 8.55 (dd,  $J_1 = 4.56$  Hz,  $J_2 = 1.04$  Hz, 1H), 7.97 (dd,  $J_1 = 8.24$  Hz,  $J_2 = 1.12$  Hz, 1H), 7.88-7.82 (m, 2H), 7.65-7.59 (m, 3H), 7.49-7.45 (m, 1H), 7.40-7.37 (m, 1H), 5.04-4.98 (m, 1H), 2.76 (s, 3H), 1.16 (d,  $J = 6.28$  Hz, 6H);  $^{13}\text{C}$  NMR (100



MHz, CDCl<sub>3</sub>)  $\delta$  170.8, 165.1, 147.3, 145.5, 141.0, 136.2, 135.1, 132.1, 131.7, 130.0, 128.0, 127.3, 126.8, 126.3, 126.0, 124.5, 69.3, 21.5, 20.7; HRMS (ESI<sup>+</sup>): calcd for C<sub>21</sub>H<sub>21</sub>N<sub>2</sub>O<sub>3</sub>, [M+H]<sup>+</sup>: 349.1547, found: 349.1549.

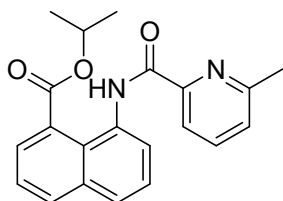

Isopropyl 8-(6-methylpicolinamido)-1-naphthoate, **3ca**: yellow solid (31.7 mg, 91%); mp 109-110 °C; <sup>1</sup>H NMR (400 MHz, CDCl<sub>3</sub>)  $\delta$  10.43 (s, 1H), 8.09 (d, *J* = 7.64 Hz, 1H), 7.97 (d, *J* = 8.08 Hz, 1H), 7.90 (d, *J* = 7.40 Hz, 1H), 7.83-7.75 (m, 2H), 7.65-7.58 (m, 2H), 7.46 (t, *J* = 7.62 Hz, 1H), 7.34 (d, *J* = 7.68 Hz, 1H), 5.09-5.02 (m, 1H), 2.70 (s, 3H), 1.13 (d, *J* = 6.28 Hz, 6H); <sup>13</sup>C NMR (100 MHz, CDCl<sub>3</sub>)  $\delta$  170.7, 163.8, 157.3, 149.4, 137.6, 135.1, 132.0, 129.5, 128.1, 127.4, 126.6, 126.4, 126.2, 125.8, 124.5, 119.8, 69.1, 24.1, 21.6; HRMS (ESI<sup>+</sup>): calcd for C<sub>21</sub>H<sub>21</sub>N<sub>2</sub>O<sub>3</sub> [M+H]<sup>+</sup>: 349.1547, found: 349.1548.

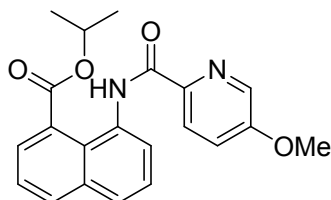

Isopropyl 8-(5-methoxypicolinamido)-1-naphthoate, **3da**: brown solid (28.8 mg, 79%); mp 76-79 °C; <sup>1</sup>H NMR (400 MHz, CDCl<sub>3</sub>)  $\delta$  10.18 (s, 1H), 8.36 (d, *J* = 2.80 Hz, 1H), 8.24 (d, *J* = 8.64 Hz, 1H), 7.90 (dd, *J*<sub>1</sub> = 8.24 Hz, *J*<sub>2</sub> = 1.12 Hz, 1H), 7.89 (d, *J* = 7.44 Hz, 1H), 7.83-7.81 (m, 1H), 7.66-7.58 (m, 2H), 7.48-7.45 (m, 1H), 7.33 (dd, *J*<sub>1</sub> = 8.68 Hz, *J*<sub>2</sub> = 2.84 Hz, 1H), 5.15-5.09 (m, 1H), 3.93 (s, 3H), 1.22 (d, *J* = 6.28 Hz, 6H); <sup>13</sup>C NMR (100 MHz, CDCl<sub>3</sub>)  $\delta$  170.8, 163.4, 158.1, 142.8, 136.4, 135.1, 131.9, 131.8, 129.5, 128.1, 127.3, 126.7, 126.4, 125.8, 124.5, 124.1, 120.3, 69.5, 55.8, 21.6; HRMS (ESI<sup>+</sup>): calcd for C<sub>21</sub>H<sub>21</sub>N<sub>2</sub>O<sub>4</sub> [M+H]<sup>+</sup>: 365.1496, found: 365.1498.

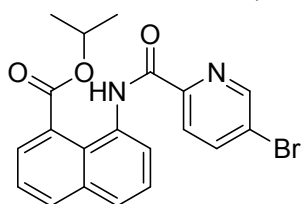

Isopropyl 8-(5-bromopicolinamido)-1-naphthoate, **3ea**: yellow solid (21.4 mg, 52%); mp 85-87 °C; <sup>1</sup>H NMR (400 MHz, CDCl<sub>3</sub>)  $\delta$  10.28 (s, 1H), 8.77 (dd, *J*<sub>1</sub> = 2.22 Hz, *J*<sub>2</sub> = 0.58 Hz, 1H), 8.18 (dd, *J*<sub>1</sub> = 8.32 Hz, *J*<sub>2</sub> = 0.56 Hz, 1H), 8.04 (dd, *J*<sub>1</sub> = 8.32 Hz, *J*<sub>2</sub> = 2.28 Hz, 1H), 7.99 (dd, *J*<sub>1</sub> = 8.24 Hz, *J*<sub>2</sub> = 1.12 Hz, 1H), 7.90 (d, *J* = 7.48 Hz, 1H), 7.84 (d, *J* = 8.16 Hz, 1H), 7.69 (dd, *J*<sub>1</sub> = 7.10 Hz, *J*<sub>2</sub> = 1.26 Hz, 1H), 7.61 (t, *J* = 7.84 Hz, 1H), 7.50-7.46 (m, 1H), 5.18-5.11 (m, 1H), 1.24 (d, *J* = 6.28 Hz, 6H); <sup>13</sup>C NMR (100 MHz, CDCl<sub>3</sub>)  $\delta$  170.7, 162.8, 149.2, 148.7, 140.2, 135.1, 132.1, 131.4, 129.2, 128.6, 127.7, 126.7, 126.3, 125.6, 124.6, 124.4, 124.3, 69.5, 21.6; HRMS (ESI<sup>+</sup>): calcd for C<sub>20</sub>H<sub>18</sub>BrN<sub>2</sub>O<sub>3</sub> [M+H]<sup>+</sup>: 413.0495, found: 413.0497.

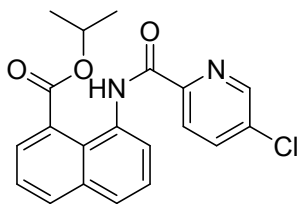

Isopropyl 8-(5-chloropicolinamido)-1-naphthoate, **3fa**: yellow solid (18.8 mg, 51%); mp 102-104 °C; <sup>1</sup>H NMR (400 MHz, CDCl<sub>3</sub>) δ 10.27 (s, 1H), 8.66 (d, *J* = 2.09 Hz, 1H), 8.25 (d, *J* = 8.27 Hz, 1H), 8.00 (dd, *J*<sub>1</sub> = 8.19 Hz, *J*<sub>2</sub> = 0.88 Hz, 1H), 7.91-7.84 (m, 3H), 7.69 (dd, *J*<sub>1</sub> = 7.11 Hz, *J*<sub>2</sub> = 1.26 Hz, 1H), 7.62 (t, *J* = 7.83 Hz, 1H), 7.50-7.46 (m, 1H), 5.18-5.11 (m, 1H), 1.24 (d, *J* = 6.28 Hz, 6H); <sup>13</sup>C NMR (100 MHz, CDCl<sub>3</sub>) δ 170.8, 162.6, 148.4, 147.1, 137.2, 135.4, 135.1, 132.1, 131.5, 129.2, 128.6, 127.7, 126.7, 126.3, 125.6, 124.6, 123.9, 69.5, 21.6; HRMS (ESI<sup>+</sup>): calcd for C<sub>20</sub>H<sub>18</sub>ClN<sub>2</sub>O<sub>3</sub> [M+H]<sup>+</sup>: 369.1000, found: 369.0998.

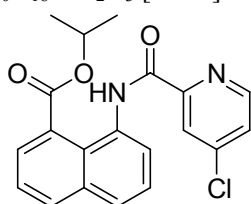

Isopropyl 8-(4-chloropicolinamido)-1-naphthoate, **3ga**: white solid (28.3 mg, 77%); mp 146-148 °C; <sup>1</sup>H NMR (400 MHz, CDCl<sub>3</sub>) δ 10.35 (s, 1H), 8.61 (d, *J* = 5.24 Hz, 1H), 8.29 (d, *J* = 1.92 Hz, 1H), 8.00-7.98 (m, 1H), 7.91 (d, *J* = 7.44 Hz, 1H), 7.85 (d, *J* = 8.00 Hz, 1H), 7.70-7.68 (m, 1H), 7.62 (t, *J* = 7.82 Hz, 1H), 7.52-7.47 (m, 2H), 5.17-5.11 (m, 1H), 1.23 (d, *J* = 6.28 Hz, 6H); <sup>13</sup>C NMR (100 MHz, CDCl<sub>3</sub>) δ 170.7, 162.4, 151.7, 149.0, 146.0, 135.1, 132.2, 131.4, 129.1, 128.7, 127.7, 126.7, 126.4, 125.6, 124.6, 123.5, 69.5, 21.6; HRMS (ESI<sup>+</sup>): calcd for C<sub>20</sub>H<sub>18</sub>ClN<sub>2</sub>O<sub>3</sub> [M+H]<sup>+</sup>: 369.1000, found: 369.1002.

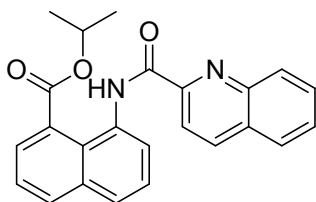

Isopropyl 8-(quinoline-2-carboxamido)-1-naphthoate, **3ha**: yellow solid (35.3 mg, 92%); mp 93-95 °C; <sup>1</sup>H NMR (400 MHz, CDCl<sub>3</sub>) δ 10.67 (s, 1H), 8.40-8.32 (m, 3H), 7.99-7.97 (m, 2H), 7.90 (dd, *J*<sub>1</sub> = 8.06 Hz, *J*<sub>2</sub> = 1.02 Hz, 1H), 7.84-7.79 (m, 2H), 7.68-7.60 (m, 3H), 7.49-7.45 (m, 1H), 5.09-5.03 (m, 1H), 1.01 (d, *J* = 6.28 Hz, 6H); <sup>13</sup>C NMR (100 MHz, CDCl<sub>3</sub>) δ 170.9, 163.7, 149.9, 146.5, 137.7, 135.2, 131.9, 130.3, 129.9, 129.5, 129.4, 128.3, 128.2, 127.8, 127.5, 126.6, 126.4, 125.8, 124.6, 119.1, 69.3, 21.5; HRMS (ESI<sup>+</sup>): calcd for C<sub>24</sub>H<sub>21</sub>N<sub>2</sub>O<sub>3</sub> [M+H]<sup>+</sup>: 385.1547, found: 385.1548.

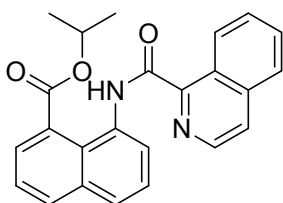

Isopropyl 8-(isoquinoline-1-carboxamido)-1-naphthoate, **3ia**: colorless solid (16.9 mg, 44%); mp 84-85 °C; <sup>1</sup>H NMR (400 MHz, CDCl<sub>3</sub>) δ 10.57 (s, 1H), 9.62-9.59 (m, 1H), 8.63 (d, *J* = 5.52 Hz,

1H), 8.01-7.97 (m, 2H), 7.89-7.84 (m, 3H), 7.75-7.63 (m, 4H), 7.50-7.46 (m, 1H), 5.00-4.94 (m, 1H), 1.08 (d,  $J = 6.28$  Hz, 6H);  $^{13}\text{C}$  NMR (100 MHz,  $\text{CDCl}_3$ )  $\delta$  170.9, 165.1, 148.2, 140.2, 137.5, 135.2, 132.0, 131.9, 130.6, 129.5, 128.9, 128.2, 127.8, 127.5, 127.3, 126.9, 126.8, 126.4, 125.9, 124.8, 124.6, 69.4, 21.5; HRMS (ESI<sup>+</sup>): calcd for  $\text{C}_{24}\text{H}_{21}\text{N}_2\text{O}_3$  [M+H]<sup>+</sup>: 385.1547, found: 385.1548.

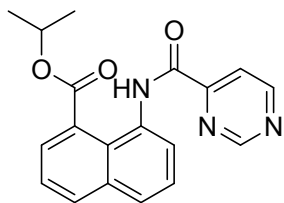

Isopropyl 8-(pyrimidine-4-carboxamido)-1-naphthoate, **3ja**: yellow oil (7.7 mg, 23%);  $^1\text{H}$  NMR (400 MHz,  $\text{CDCl}_3$ )  $\delta$  10.47 (s, 1H), 9.41 (d,  $J = 1.28$  Hz, 1H), 9.04 (d,  $J = 5.00$  Hz, 1H), 8.22 (dd,  $J_1 = 5.02$  Hz,  $J_2 = 1.34$  Hz, 1H), 8.02 (dd,  $J_1 = 8.22$  Hz,  $J_2 = 1.06$  Hz, 1H), 7.93 (d,  $J = 7.48$  Hz, 1H), 7.87 (d,  $J = 8.08$  Hz, 1H), 7.76 (dd,  $J_1 = 7.12$  Hz,  $J_2 = 1.20$  Hz, 1H), 7.63 (t,  $J = 7.84$  Hz, 1H), 7.52-7.48 (m, 1H), 5.24-5.18 (m, 1H), 1.26 (d,  $J = 6.24$  Hz, 6H);  $^{13}\text{C}$  NMR (100 MHz,  $\text{CDCl}_3$ )  $\delta$  170.1, 161.9, 159.4, 157.8, 156.8, 135.2, 132.5, 130.9, 129.2, 128.8, 128.1, 126.8, 126.3, 125.4, 124.7, 119.1, 69.7, 21.6; HRMS (ESI<sup>+</sup>): calcd for  $\text{C}_{19}\text{H}_{18}\text{N}_3\text{O}_3$  [M+H]<sup>+</sup>: 336.1343, found: 336.1342.

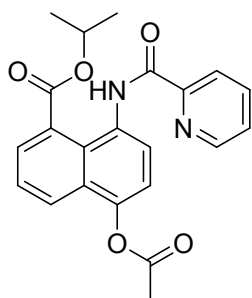

Isopropyl 5-acetoxy-8-(picolinamido)-1-naphthoate, **3ka**: brown oil (18.4 mg, 47%);  $^1\text{H}$  NMR (400 MHz,  $\text{CDCl}_3$ )  $\delta$  10.28 (s, 1H), 8.70 (d,  $J = 4.52$  Hz, 1H), 8.29 (d,  $J = 7.76$  Hz, 1H), 8.06-8.04 (m, 1H), 7.92-7.87 (m, 2H), 7.66 (d,  $J = 6.28$  Hz, 1H), 7.54-7.49 (m, 2H), 7.41 (d,  $J = 8.20$  Hz, 1H), 5.11-5.05 (m, 1H), 2.47 (s, 3H), 1.19 (d,  $J = 6.28$  Hz, 6H);  $^{13}\text{C}$  NMR (100 MHz,  $\text{CDCl}_3$ )  $\delta$  170.4, 169.3, 163.6, 149.9, 148.1, 145.2, 137.5, 129.9, 129.7, 128.5, 128.2, 126.8, 126.6, 126.4, 125.2, 124.6, 122.9, 118.9, 69.7, 21.5, 21.1; HRMS (ESI<sup>+</sup>): calcd for  $\text{C}_{22}\text{H}_{21}\text{N}_2\text{O}_5$  [M+H]<sup>+</sup>: 393.1445, found: 393.1444.

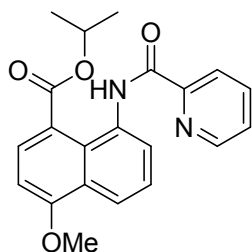

Isopropyl 4-methoxy-8-(picolinamido)-1-naphthoate, **3la**: brown solid (25.1 mg, 69%); mp 156-158 °C;  $^1\text{H}$  NMR (400 MHz,  $\text{CDCl}_3$ )  $\delta$  10.55 (s, 1H), 8.69 (d,  $J = 4.56$  Hz, 1H), 8.31-8.26 (m, 2H), 7.96 (d,  $J = 7.32$  Hz, 1H), 7.87 (t,  $J = 7.70$  Hz, 1H), 7.72 (d,  $J = 8.08$  Hz, 1H), 7.61 (t,  $J = 7.96$  Hz,

1H), 7.48-7.45 (m, 1H), 6.76 (d,  $J = 8.04$  Hz, 1H), 5.19-5.12 (m, 1H), 4.00 (s, 3H), 1.21 (d,  $J = 6.28$  Hz, 6H);  $^{13}\text{C}$  NMR (100 MHz,  $\text{CDCl}_3$ )  $\delta$  170.4, 163.5, 158.3, 150.3, 148.1, 137.4, 131.7, 130.4, 127.3, 127.2, 127.0, 126.4, 125.7, 122.8, 121.3, 121.1, 102.3, 69.1, 55.9, 21.6; HRMS (ESI<sup>+</sup>): calcd for  $\text{C}_{21}\text{H}_{21}\text{N}_2\text{O}_4$  [M+H]<sup>+</sup>: 365.1496, found: 365.1499.

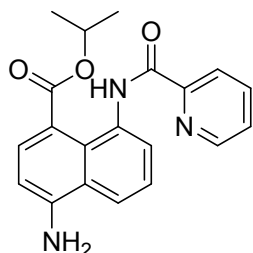

Isopropyl 4-amino-8-(picolinamido)-1-naphthoate, **3ma**: brown solid (13.3 mg, 38%); mp 130-133 °C;  $^1\text{H}$  NMR (400 MHz,  $\text{CDCl}_3$ )  $\delta$  10.78 (s, 1H), 8.72-8.71 (m, 1H), 8.43 (d,  $J = 7.48$  Hz, 1H), 8.36 (d,  $J = 7.80$  Hz, 1H), 8.00-7.89 (m, 3H), 7.74 (d,  $J = 8.56$  Hz, 1H), 7.60-7.52 (m, 3H), 7.01 (s, 1H), 5.12-5.06 (m, 1H), 1.35 (d,  $J = 6.24$  Hz, 6H);  $^{13}\text{C}$  NMR (100 MHz,  $\text{CDCl}_3$ )  $\delta$  162.3, 154.0, 149.9, 148.2, 137.8, 133.5, 133.0, 127.0, 126.6, 126.2, 126.1, 122.5, 118.7, 117.3, 116.9, 69.1, 22.2; HRMS (ESI<sup>+</sup>): calcd for  $\text{C}_{20}\text{H}_{20}\text{N}_3\text{O}_3$  [M+H]<sup>+</sup>: 350.1499, found: 350.1051.

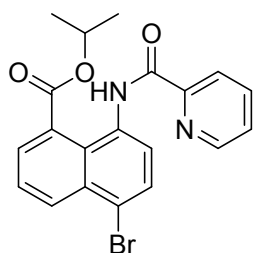

Isopropyl 5-bromo-8-(picolinamido)-1-naphthoate, **3na**: yellow solid (31.3 mg, 76%); mp 114-116 °C;  $^1\text{H}$  NMR (400 MHz,  $\text{CDCl}_3$ )  $\delta$  10.26 (s, 1H), 8.70 (d,  $J = 4.48$  Hz, 1H), 8.45 (dd,  $J_1 = 8.52$  Hz,  $J_2 = 1.00$  Hz, 1H), 8.28 (d,  $J = 7.84$  Hz, 1H), 7.93-7.88 (m, 2H), 7.75 (d,  $J = 8.12$  Hz, 1H), 7.68 (dd,  $J_1 = 7.04$  Hz,  $J_2 = 1.12$  Hz, 1H), 7.61-7.57 (m, 1H), 7.52-7.49 (m, 1H), 5.11-5.04 (m, 1H), 1.18 (d,  $J = 6.28$  Hz, 6H);  $^{13}\text{C}$  NMR (100 MHz,  $\text{CDCl}_3$ )  $\delta$  170.2, 163.5, 149.8, 148.1, 137.6, 133.1, 131.7, 130.9, 130.6, 130.1, 128.8, 127.2, 127.0, 126.7, 126.1, 122.9, 121.6, 69.8, 21.5; HRMS (ESI<sup>+</sup>): calcd for  $\text{C}_{20}\text{H}_{18}\text{BrN}_2\text{O}_3$  [M+H]<sup>+</sup>: 413.0495, found: 413.0496.

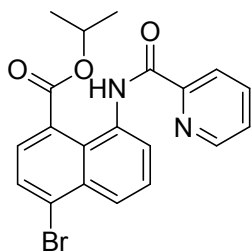

Isopropyl 4-bromo-8-(picolinamido)-1-naphthoate, **3oa**: yellow solid (28.4 mg, 69%); mp 114-116 °C;  $^1\text{H}$  NMR (400 MHz,  $\text{CDCl}_3$ )  $\delta$  10.27 (s, 1H), 8.71-8.69 (m, 1H), 8.34-8.28 (m, 2H), 7.93-7.88 (m, 2H), 7.80 (d,  $J = 7.68$  Hz, 1H), 7.75-7.71 (m, 1H), 7.52-7.48 (m, 1H), 7.45 (d,  $J = 7.68$  Hz, 1H), 5.07-5.01 (m, 1H), 1.17 (d,  $J = 6.28$  Hz, 6H);  $^{13}\text{C}$  NMR (100 MHz,  $\text{CDCl}_3$ )  $\delta$  170.0, 163.6, 149.8, 148.1, 137.6, 133.4, 132.2, 129.6, 129.1, 127.9, 127.8, 127.7, 127.2, 126.8, 126.7, 126.6,

122.9, 69.8, 21.5; HRMS (ESI<sup>+</sup>): calcd for C<sub>20</sub>H<sub>18</sub>BrN<sub>2</sub>O<sub>3</sub> [M+H]<sup>+</sup>: 413.0495, found: 413.0493.

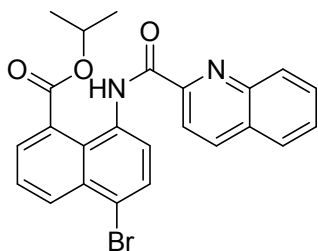

Isopropyl 5-bromo-8-(quinoline-2-carboxamido)-1-naphthoate, **3pa**: yellow solid (28.6 mg, 62%); mp 128-130 °C; <sup>1</sup>H NMR (400 MHz, CDCl<sub>3</sub>) δ 10.54 (s, 1H), 8.48 (dd, *J*<sub>1</sub> = 8.52 Hz, *J*<sub>2</sub> = 1.24 Hz, 1H), 8.38 (s, 2H), 8.33 (d, *J* = 8.44 Hz, 1H), 7.96-7.93 (m, 2H), 7.86-7.80 (m, 2H), 7.71-7.67 (m, 2H), 7.63-7.59 (m, 1H), 5.03-4.97 (m, 1H), 1.00 (d, *J* = 6.28 Hz, 6H); <sup>13</sup>C NMR (100 MHz, CDCl<sub>3</sub>) δ 170.4, 163.7, 149.5, 146.4, 137.8, 133.2, 131.9, 130.9, 130.6, 130.4, 130.2, 129.9, 129.5, 128.8, 128.3, 127.8, 127.3, 126.8, 126.1, 121.6, 119.0, 69.5, 21.0; HRMS (ESI<sup>+</sup>): calcd for C<sub>24</sub>H<sub>20</sub>N<sub>2</sub>O<sub>3</sub> [M+H]<sup>+</sup>: 463.0652, found: 463.0653.

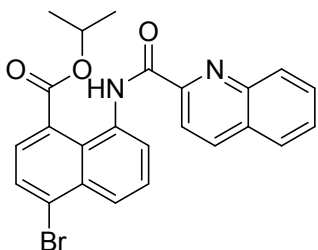

Isopropyl 4-bromo-8-(quinoline-2-carboxamido)-1-naphthoate, **3qa**: yellow solid (29.1 mg, 63%); mp 137-139 °C; <sup>1</sup>H NMR (400 MHz, CDCl<sub>3</sub>) δ 10.54 (s, 1H), 8.37-8.31 (m, 4H), 7.99 (d, *J* = 7.44 Hz, 1H), 7.93-7.91 (m, 1H), 7.85-7.80 (m, 2H), 7.75-7.71 (m, 1H), 7.69-7.65 (m, 1H), 7.46 (d, *J* = 7.68 Hz, 1H), 5.00-4.94 (m, 1H), 0.99 (d, *J* = 6.28 Hz, 6H); <sup>13</sup>C NMR (100 MHz, CDCl<sub>3</sub>) δ 170.1, 163.8, 149.6, 146.4, 137.7, 133.4, 132.3, 130.4, 129.9, 129.7, 129.5, 129.1, 128.3, 127.9, 127.8, 127.7, 127.6, 127.3, 126.8, 126.6, 119.1, 69.6, 21.4; HRMS (ESI<sup>+</sup>): calcd for C<sub>24</sub>H<sub>20</sub>N<sub>2</sub>O<sub>3</sub> [M+H]<sup>+</sup>: 463.0652, found: 463.0653.

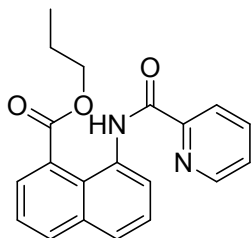

Propyl 8-(picolinamido)-1-naphthoate, **3ab**: yellow solid (30.1 mg, 90%); mp 108-110 °C; <sup>1</sup>H NMR (400 MHz, CDCl<sub>3</sub>) δ 10.31 (s, 1H), 8.72-8.70 (m, 1H), 8.31-8.28 (m, 1H), 7.99 (dd, *J*<sub>1</sub> = 8.28 Hz, *J*<sub>2</sub> = 1.16 Hz, 1H), 7.93-7.89 (m, 2H), 7.86-7.84 (m, 1H), 7.69 (dd, *J*<sub>1</sub> = 7.08 Hz, *J*<sub>2</sub> = 1.28 Hz, 1H), 7.62 (t, *J* = 7.82 Hz, 1H), 7.53-7.46 (m, 2H), 4.11 (t, *J* = 6.82 Hz, 2H), 1.66-1.57 (m, 2H), 0.83 (t, *J* = 7.44 Hz, 3H); <sup>13</sup>C NMR (100 MHz, CDCl<sub>3</sub>) δ 171.3, 163.5, 150.0, 149.1, 137.5, 135.1, 131.9, 131.6, 129.1, 128.3, 127.6, 126.8, 126.6, 126.4, 125.9, 124.6, 122.8, 67.6, 21.7, 10.3; HRMS (ESI<sup>+</sup>): calcd for C<sub>20</sub>H<sub>19</sub>N<sub>2</sub>O<sub>3</sub> [M+H]<sup>+</sup>: 335.1390, found: 335.1393.

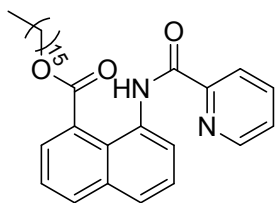

Hexadecyl 8-(picolinamido)-1-naphthoate, **3ac**: yellow solid (17.5 mg, 34%); mp 66-68 °C; <sup>1</sup>H NMR (400 MHz, CDCl<sub>3</sub>) δ 10.32 (s, 1H), 8.71-8.70 (m, 1H), 8.30-8.28 (m, 1H), 7.99 (dd, *J*<sub>1</sub> = 8.28 Hz, *J*<sub>2</sub> = 1.08 Hz, 1H), 7.93-7.88 (m, 2H), 7.85-7.83 (m, 1H), 7.68 (dd, *J*<sub>1</sub> = 7.08 Hz, *J*<sub>2</sub> = 1.24 Hz, 1H), 7.62 (t, *J* = 7.84 Hz, 1H), 7.52-7.46 (m, 2H), 4.14 (t, *J* = 6.88 Hz, 2H), 1.60-1.55 (m, 2H), 1.25-1.20 (m, 26H), 0.87 (t, *J* = 6.68 Hz, 3H); <sup>13</sup>C NMR (100 MHz, CDCl<sub>3</sub>) δ 171.3, 163.5, 150.1, 148.1, 137.5, 135.1, 131.9, 131.7, 129.1, 128.3, 127.5, 126.7, 126.5, 126.4, 125.9, 124.6, 122.9, 66.3, 31.9, 29.7, 29.7, 29.7, 29.6, 29.6, 29.5, 29.4, 29.2, 28.4, 25.9, 22.7, 14.1; HRMS (ESI<sup>+</sup>): calcd for C<sub>33</sub>H<sub>45</sub>N<sub>2</sub>O<sub>3</sub> [M+H]<sup>+</sup>: 517.3425, found: 517.3427.

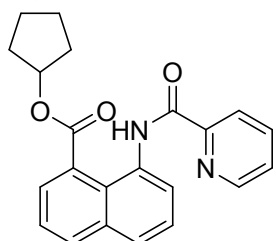

Cyclopentyl 8-(picolinamido)-1-naphthoate, **3ad**: yellow solid (18.7 mg, 52%); mp 95-97 °C; <sup>1</sup>H NMR (400 MHz, CDCl<sub>3</sub>) δ 10.36 (s, 1H), 8.72 (d, *J* = 4.28 Hz, 1H), 8.29 (d, *J* = 7.80 Hz, 1H), 7.97 (dd, *J*<sub>1</sub> = 8.22 Hz, *J*<sub>2</sub> = 1.04 Hz, 1H), 7.92-7.88 (m, 2H), 7.83 (d, *J* = 8.08 Hz, 1H), 7.64-7.59 (m, 2H), 7.51-7.45 (m, 2H), 5.25-5.22 (m, 1H), 1.69-1.65 (m, 6H), 1.54-1.50 (m, 2H); <sup>13</sup>C NMR (100 MHz, CDCl<sub>3</sub>) δ 171.0, 163.5, 150.1, 148.1, 137.5, 135.1, 131.9, 131.7, 129.4, 128.3, 127.5, 126.7, 126.5, 126.4, 125.8, 124.6, 122.8, 78.8, 32.6, 20.8; HRMS (ESI<sup>+</sup>): calcd for C<sub>22</sub>H<sub>21</sub>N<sub>2</sub>O<sub>3</sub> [M+H]<sup>+</sup>: 361.1547, found: 361.1548.

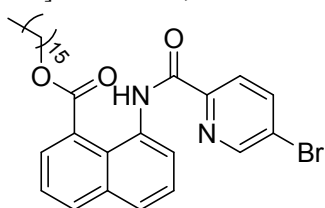

Hexadecyl 8-(5-bromopicolinamido)-1-naphthoate, **3ac**: yellow solid (25.5 mg, 43%); mp 65-68 °C; <sup>1</sup>H NMR (400 MHz, CDCl<sub>3</sub>) δ 10.23 (s, 1H), 8.76 (d, *J* = 1.76 Hz, 1H), 8.20-8.17 (m, 1H), 8.04 (dd, *J*<sub>1</sub> = 8.32 Hz, *J*<sub>2</sub> = 2.24 Hz, 1H), 8.00 (dd, *J*<sub>1</sub> = 8.24 Hz, *J*<sub>2</sub> = 1.00 Hz, 1H), 7.90-7.84 (m, 2H), 7.71 (dd, *J*<sub>1</sub> = 7.08 Hz, *J*<sub>2</sub> = 1.20 Hz, 1H), 7.62 (t, *J* = 7.84 Hz, 1H), 7.50-7.47 (m, 1H), 4.17 (t, *J* = 6.26 Hz, 2H), 1.64-1.55 (m, 2H), 1.25-1.22 (m, 26H), 0.88 (t, *J* = 6.80 Hz, 3H); <sup>13</sup>C NMR (100 MHz, CDCl<sub>3</sub>) δ 171.3, 162.7, 149.3, 148.6, 140.2, 135.1, 132.1, 131.4, 128.9, 128.6, 127.7, 126.8, 126.4, 125.7, 124.6, 124.4, 124.3, 66.3, 31.9, 29.7, 29.7, 29.7, 29.7, 29.6, 29.5, 29.4, 29.3, 28.5, 25.9, 22.7, 14.2; HRMS (ESI<sup>+</sup>): calcd for C<sub>33</sub>H<sub>44</sub>BrN<sub>2</sub>O<sub>3</sub> [M+H]<sup>+</sup>: 595.2530, found: 595.2531.

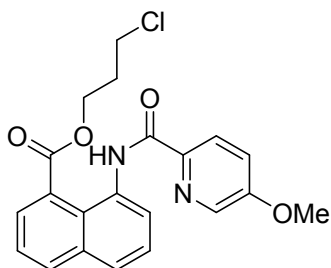

3-Chloropropyl 8-(5-methoxypicolinamido)-1-naphthoate, **3de**: brown solid (20.7 mg, 52%); mp 93-95 °C;  $^1\text{H}$  NMR (400 MHz,  $\text{CDCl}_3$ )  $\delta$  10.07 (s, 1H), 8.37 (d,  $J = 2.68$  Hz, 1H), 8.24 (d,  $J = 8.64$  Hz, 1H), 7.99 (dd,  $J_1 = 8.24$  Hz,  $J_2 = 1.00$  Hz, 1H), 7.88-7.82 (m, 2H), 7.67-7.59 (m, 2H), 7.49-7.46 (m, 1H), 7.33 (dd,  $J_1 = 8.68$  Hz,  $J_2 = 2.84$  Hz, 1H), 4.30 (t,  $J = 6.24$  Hz, 2H), 3.93 (s, 3H), 3.51 (t,  $J = 6.34$  Hz, 2H), 2.08-2.02 (m, 2H);  $^{13}\text{C}$  NMR (100 MHz,  $\text{CDCl}_3$ )  $\delta$  171.1, 163.4, 158.3, 142.5, 136.5, 135.0, 132.0, 131.8, 128.7, 128.2, 127.5, 126.9, 126.5, 126.0, 124.6, 124.1, 120.5, 62.8, 55.9, 41.2, 31.3; HRMS (ESI $^+$ ): calcd for  $\text{C}_{21}\text{H}_{20}\text{ClN}_2\text{O}_4$   $[\text{M}+\text{H}]^+$ : 399.1106, found: 399.1107.

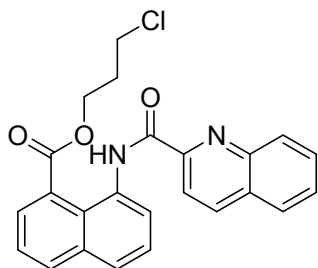

3-Chloropropyl 8-(quinoline-2-carboxamido)-1-naphthoate, **3he**: yellow solid (31.4 mg, 75%); mp 104-106 °C;  $^1\text{H}$  NMR (400 MHz,  $\text{CDCl}_3$ )  $\delta$  10.54 (s, 1H), 8.41-8.36 (m, 2H), 8.32 (d,  $J = 8.44$  Hz, 1H), 8.02 (dd,  $J_1 = 8.24$  Hz,  $J_2 = 1.04$  Hz, 1H), 7.97-7.92 (m, 2H), 7.87-7.82 (m, 2H), 7.70-7.62 (m, 3H), 7.52-7.48 (m, 1H), 4.19 (t,  $J = 6.22$  Hz, 2H), 3.32 (t,  $J = 6.38$  Hz, 2H), 1.90-1.83 (m, 2H);  $^{13}\text{C}$  NMR (100 MHz,  $\text{CDCl}_3$ )  $\delta$  171.1, 163.6, 149.6, 146.4, 137.8, 135.1, 132.1, 131.8, 130.5, 129.8, 129.5, 128.7, 128.3, 128.3, 127.9, 127.6, 126.7, 126.6, 125.9, 124.6, 119.1, 62.6, 40.9, 31.2; HRMS (ESI $^+$ ): calcd for  $\text{C}_{24}\text{H}_{20}\text{ClN}_2\text{O}_3$   $[\text{M}+\text{H}]^+$ : 419.1157, found: 419.1159.

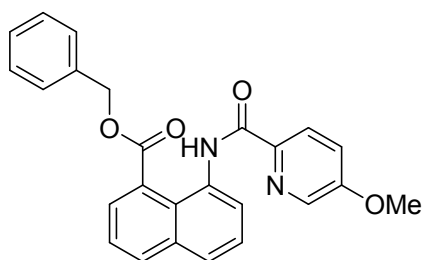

Benzyl 8-(5-methoxypicolinamido)-1-naphthoate, **3df**: brown oil (8.7 mg, 21%);  $^1\text{H}$  NMR (400 MHz,  $\text{CDCl}_3$ )  $\delta$  10.17 (s, 1H), 8.31 (d,  $J = 2.76$  Hz, 1H), 8.23 (d,  $J = 8.64$  Hz, 1H), 7.98 (dd,  $J_1 = 8.26$  Hz,  $J_2 = 1.10$  Hz, 1H), 7.89 (d,  $J = 7.44$  Hz, 1H), 7.83 (d,  $J = 8.16$  Hz, 1H), 7.67-7.59 (m, 2H), 7.47-7.43 (m, 1H), 7.32-7.28 (m, 6H), 5.22 (s, 2H), 3.91 (s, 3H);  $^{13}\text{C}$  NMR (100 MHz,  $\text{CDCl}_3$ )  $\delta$  171.0, 163.4, 158.2, 142.6, 136.4, 135.5, 135.0, 132.0, 131.8, 128.7, 128.5, 128.3, 128.3, 128.0, 127.4, 126.8, 126.5, 126.0, 124.6, 124.2, 120.4, 67.6, 55.8; HRMS (ESI $^+$ ): calcd for  $\text{C}_{25}\text{H}_{21}\text{N}_2\text{O}_4$   $[\text{M}+\text{H}]^+$ : 413.1496, found: 413.1499.

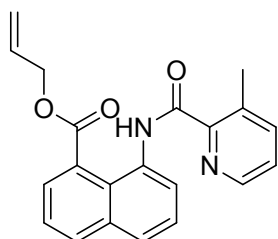

Allyl 8-(3-methylpicolinamido)-1-naphthoate, **3bg**: brown solid (8.0 mg, 23%); mp 119-121 °C; <sup>1</sup>H NMR (400 MHz, CDCl<sub>3</sub>) δ 10.35 (s, 1H), 8.55-8.53 (m, 1H), 7.99 (dd, *J*<sub>1</sub> = 8.24 Hz, *J*<sub>2</sub> = 1.12 Hz, 1H), 7.87-7.83 (m, 2H), 7.68-7.60 (m, 3H), 7.50-7.46 (m, 1H), 7.42-7.38 (m, 1H), 5.89-5.79 (m, 1H), 5.23-5.12 (m, 2H), 4.57 (dt, *J*<sub>1</sub> = 5.77 Hz, *J*<sub>2</sub> = 1.26 Hz, 2H), 2.77 (s, 3H); <sup>13</sup>C NMR (100 MHz, CDCl<sub>3</sub>) δ 170.8, 165.0, 147.0, 145.4, 141.1, 136.4, 135.1, 131.9, 131.8, 131.6, 128.9, 128.2, 127.4, 126.9, 126.4, 126.2, 126.1, 124.6, 118.6, 66.4, 20.8; HRMS (ESI<sup>+</sup>): calcd for C<sub>21</sub>H<sub>19</sub>N<sub>2</sub>O<sub>3</sub> [M+H]<sup>+</sup>: 347.1390, found: 347.1392.

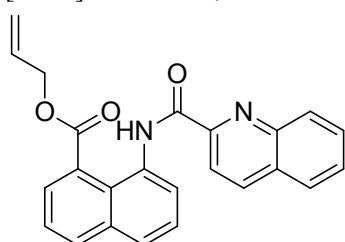

Allyl 8-(quinoline-2-carboxamido)-1-naphthoate, **3hg**: brown solid (12.2 mg, 32%); mp 109-111 °C; <sup>1</sup>H NMR (400 MHz, CDCl<sub>3</sub>) δ 10.54 (s, 1H), 8.41-8.35 (m, 2H), 8.31 (d, *J* = 8.48 Hz, 1H), 8.02-7.92 (m, 3H), 7.87-7.81 (m, 2H), 7.73-7.62 (m, 3H), 7.52-7.48 (m, 1H), 5.78-5.67 (m, 1H), 5.05-4.95 (m, 2H), 4.55 (dt, *J*<sub>1</sub> = 5.76 Hz, *J*<sub>2</sub> = 1.36 Hz, 2H); <sup>13</sup>C NMR (100 MHz, CDCl<sub>3</sub>) δ 170.8, 163.6, 149.7, 146.4, 137.7, 135.1, 132.0, 131.8, 131.5, 130.4, 129.9, 129.5, 128.8, 128.4, 128.2, 127.8, 127.5, 126.6, 126.5, 125.9, 124.7, 119.2, 118.4, 66.4; HRMS (ESI<sup>+</sup>): calcd for C<sub>24</sub>H<sub>19</sub>N<sub>2</sub>O<sub>3</sub> [M+H]<sup>+</sup>: 383.1390, found: 383.1392.

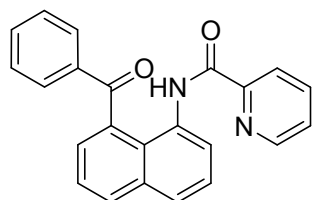

N-(8-benzoylnaphthalen-1-yl)picolinamide, **3ah**: White solid (12.7 mg, 36%); mp 144-146 °C; <sup>1</sup>H NMR (400 MHz, CDCl<sub>3</sub>) δ 9.72 (s, 1H), 8.54-8.52 (m, 1H), 8.04-8.02 (m, 1H), 7.92 (d, *J* = 7.92 Hz, 1H), 7.80-7.78 (m, 1H), 7.74-7.68 (m, 2H), 7.64-7.60 (m, 1H), 7.56-7.52 (m, 1H), 7.50-7.48 (m, 2H), 7.42-7.32 (m, 3H), 7.14-7.10 (m, 2H); <sup>13</sup>C NMR (100 MHz, CDCl<sub>3</sub>) δ 199.4, 163.1, 149.2, 147.9, 137.0, 136.9, 136.0, 135.1, 133.2, 131.7, 130.5, 130.0, 128.0, 127.9, 127.8, 126.9, 126.6, 126.5, 126.2, 124.9, 122.1; HRMS (ESI<sup>+</sup>): calcd for C<sub>23</sub>H<sub>16</sub>N<sub>2</sub>O<sub>2</sub> [M+H]<sup>+</sup>: 353.1285, Found: 353.1287.

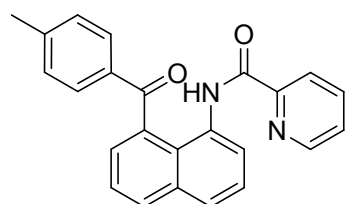

N-(8-(4-methylbenzoyl)naphthalen-1-yl)picolinamide, **3ai**: White solid (13.9 mg, 38%); mp 166-



168 °C; <sup>1</sup>H NMR (400 MHz, CDCl<sub>3</sub>) δ 9.72 (s, 1H), 8.55-8.53 (m, 1H), 8.03-8.00 (m, 1H), 7.91 (d, *J* = 8.20 Hz, 1H), 7.81-7.79 (m, 1H), 7.75-7.68 (m, 2H), 7.63-7.59 (m, 1H), 7.55-7.52 (m, 1H), 7.42-7.38 (m, 4H), 6.91 (d, *J* = 7.96 Hz, 2H), 2.27 (s, 3H); <sup>13</sup>C NMR (100 MHz, CDCl<sub>3</sub>) δ 199.2, 163.2, 149.3, 147.9, 144.1, 136.8, 136.2, 135.1, 134.6, 131.8, 130.4, 130.2, 128.6, 127.9, 127.7, 126.8, 126.5, 126.4, 126.2, 124.9, 122.1, 21.6; HRMS (ESI<sup>+</sup>): calcd for C<sub>24</sub>H<sub>18</sub>N<sub>2</sub>O<sub>2</sub> [M+H]<sup>+</sup>: 367.1441, Found: 367.1442.

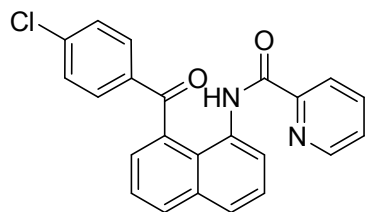

N-(8-(4-chlorobenzoyl)naphthalen-1-yl)picolinamide, **3aj**: White solid (11.8 mg, 36%); mp 174-177 °C; <sup>1</sup>H NMR (400 MHz, CDCl<sub>3</sub>) δ 9.66 (s, 1H), 8.54 (d, *J* = 4.72 Hz, 1H), 8.03 (d, *J* = 8.12 Hz, 1H), 7.92 (d, *J* = 8.04 Hz, 1H), 7.82-7.81 (m, 1H), 7.77-7.73 (m, 1H), 7.71-7.69 (m, 1H), 7.64-7.61 (m, 1H), 7.56-7.53 (m, 1H), 7.44-7.37 (m, 4H), 7.07 (d, *J* = 8.56 Hz, 2H); <sup>13</sup>C NMR (100 MHz, CDCl<sub>3</sub>) δ 198.2, 163.2, 149.1, 147.9, 139.7, 137.1, 135.4, 135.3, 135.1, 131.6, 131.3, 130.7, 128.2, 128.2, 128.0, 127.2, 126.7, 126.4, 126.4, 124.9, 122.2; HRMS (ESI<sup>+</sup>): calcd for C<sub>23</sub>H<sub>15</sub>ClN<sub>2</sub>O<sub>2</sub> [M+H]<sup>+</sup>: 387.0895, Found: 387.0894.

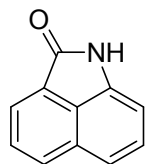

Benzo[cd]indol-2(1H)-one, **4a**: yellow solid (18.6 mg, 55%); mp 173-176 °C; <sup>1</sup>H NMR (400 MHz, CDCl<sub>3</sub>) δ 9.10 (s, 1H), 8.11 (d, *J* = 7.00 Hz, 1H), 8.05 (d, *J* = 8.08 Hz, 1H), 7.76-7.72 (m, 1H), 7.56 (d, *J* = 8.44 Hz, 1H), 7.48-7.44 (m, 1H), 7.03 (d, *J* = 7.00 Hz, 1H); <sup>13</sup>C NMR (100 MHz, CDCl<sub>3</sub>) δ 170.4, 137.2, 131.2, 129.4, 128.7, 126.8, 126.3, 124.5, 120.4, 106.7; HRMS (ESI<sup>+</sup>): calcd for C<sub>11</sub>H<sub>8</sub>NO [M+H]<sup>+</sup>: 170.0600, found: 170.0599.

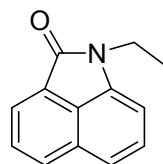

1-Ethylbenzo[cd]indol-2(1H)-one, **5a**: yellow solid (189 mg, 96%); mp 65-68 °C; <sup>1</sup>H NMR (400 MHz, CDCl<sub>3</sub>) δ 8.00 (d, *J* = 6.96 Hz, 1H), 7.91 (d, *J* = 8.12 Hz, 1H), 7.64-7.60 (m, 1H), 7.45-7.37 (m, 2H), 6.83 (d, *J* = 6.88 Hz, 1H), 3.92 (q, *J* = 7.24 Hz, 2H), 1.34 (t, *J* = 7.24 Hz, 3H); <sup>13</sup>C NMR (100 MHz, CDCl<sub>3</sub>) δ 167.7, 139.0, 130.6, 129.0, 128.5, 128.4, 126.7, 125.1, 124.0, 120.1, 104.8, 34.9, 14.1; HRMS (ESI<sup>+</sup>): calcd for C<sub>13</sub>H<sub>12</sub>NO [M+H]<sup>+</sup>: 198.0913, found: 198.0915.

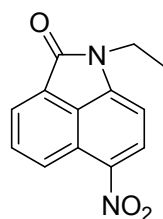

1-Ethyl-6-nitrobenzo[cd]indol-2(1H)-one, **6a**: yellow solid (155 mg, 67%); mp 158-161 °C; <sup>1</sup>H

NMR (400 MHz, CDCl<sub>3</sub>)  $\delta$  8.89 (d,  $J$  = 8.52 Hz, 1H), 8.56 (d,  $J$  = 8.00 Hz, 1H), 8.06 (d,  $J$  = 6.96 Hz, 1H), 7.86 (t,  $J$  = 7.76 Hz, 1H), 6.92 (d,  $J$  = 8.00 Hz, 1H), 3.99 (q,  $J$  = 7.20 Hz, 2H), 1.40 (t,  $J$  = 7.20 Hz, 3H); <sup>13</sup>C NMR (100 MHz, CDCl<sub>3</sub>)  $\delta$  167.6, 145.6, 138.9, 131.9, 129.9, 129.9, 126.0, 125.6, 125.3, 122.5, 102.9, 35.2, 13.9; HRMS (ESI<sup>+</sup>): calcd for C<sub>13</sub>H<sub>11</sub>N<sub>2</sub>O<sub>3</sub> [M+H]<sup>+</sup>: 243.0764, found: 243.0762.

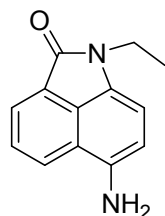

1-Ethyl-6-nitrobenzo[cd]indol-2(1H)-one, **7a**: red solid (105 mg, 77%); mp 181-183 °C; <sup>1</sup>H NMR (400 MHz, CDCl<sub>3</sub>)  $\delta$  8.07 (d,  $J$  = 7.00 Hz, 1H), 8.00 (d,  $J$  = 8.16 Hz, 1H), 7.69-7.65 (m, 1H), 6.73 (d,  $J$  = 7.44 Hz, 1H), 6.64 (d,  $J$  = 7.44 Hz, 1H), 3.94 (q,  $J$  = 7.24 Hz, 2H), 3.41 (s, 2H), 1.35 (t,  $J$  = 7.24 Hz, 3H); <sup>13</sup>C NMR (100 MHz, CDCl<sub>3</sub>)  $\delta$  167.3, 138.4, 131.1, 127.6, 127.4, 125.6, 125.3, 124.3, 121.5, 109.7, 106.5, 34.9, 14.1; HRMS (ESI<sup>+</sup>): calcd for C<sub>13</sub>H<sub>13</sub>N<sub>2</sub>O [M+H]<sup>+</sup>: 213.1022, found: 213.1023.

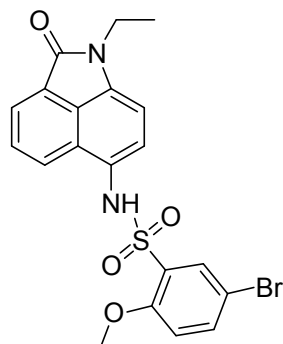

5-bromo-N-(1-ethyl-2-oxo-1,2-dihydrobenzo[cd]indol-6-yl)-2-methoxybenzenesulfonamide, **8a**: yellow solid (202 mg, 88%); mp 209-211 °C; <sup>1</sup>H NMR (400 MHz, CDCl<sub>3</sub>)  $\delta$  8.21 (d,  $J$  = 8.28 Hz, 1H), 8.00 (d,  $J$  = 6.96 Hz, 1H), 7.80-7.79 (m, 2H), 7.69-7.65 (m, 1H), 7.53 (dd,  $J_1$  = 8.80 Hz,  $J_2$  = 2.48 Hz, 1H), 7.17 (d,  $J$  = 7.56 Hz, 1H), 6.90 (d,  $J$  = 8.88 Hz, 1H), 6.71 (d,  $J$  = 7.60 Hz, 1H), 4.06 (s, 3H), 3.88 (q,  $J$  = 7.20 Hz, 2H), 1.30 (t,  $J$  = 7.20 Hz, 3H); <sup>13</sup>C NMR (100 MHz, CDCl<sub>3</sub>)  $\delta$  167.6, 155.4, 138.1, 137.6, 133.2, 129.0, 128.2, 127.0, 126.8, 126.4, 126.1, 125.5, 124.8, 124.4, 113.9, 112.8, 104.8, 56.7, 35.0, 14.0; HRMS (ESI<sup>+</sup>): calcd for C<sub>20</sub>H<sub>18</sub>BrN<sub>2</sub>O<sub>4</sub>S [M+H]<sup>+</sup>: 461.0165, found: 461.0167.

## 5. References

- [1]. R. Shang, L. Ilies, E. Nakamura, *J. Am. Chem. Soc.* **2015**, *137*, 7660.
- [2]. (a) X. Xue, Y. Zhang, Z. Liu, M. Song, Y. Xing, Q. Xiang, Z. Wang, Z. Tu, Y. Zhou, K. Deng, Y. Xu, *J. Med. Chem.* **2016**, *59*, 1565; (b) Y. Feng, S. Xiao, Y. Chen, H. Jiang, N. Liu, C. Luo, S. Chen, H. Chen, *Eur. J. Med. Chem.* **2018**, *152*, 264.

## 6. The Single Crystal X-ray Diffraction Study

## The Single Crystal X-ray Diffraction Study of **3na**

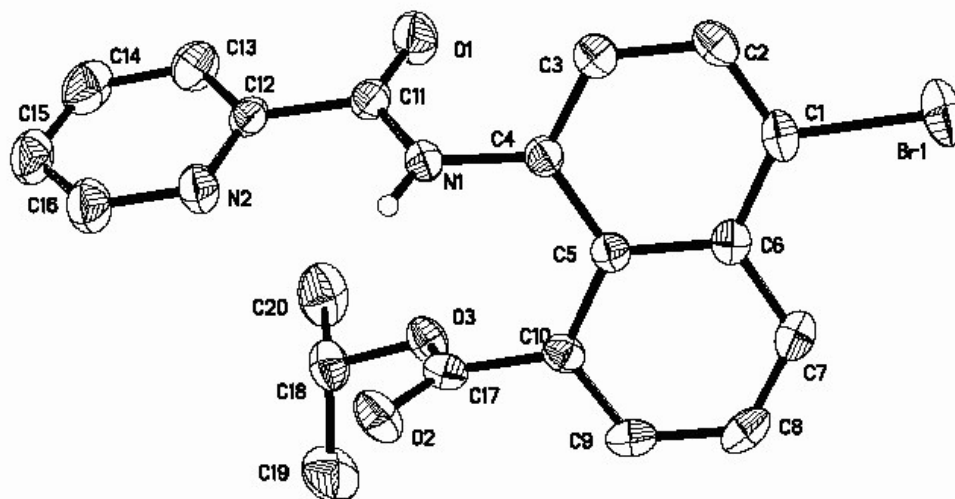

CCDC 1956109 (**3na**) contains the supplementary crystallographic data for this paper. These data can be obtained free of charge from The Cambridge Crystallographic Data Centre *via* [www.ccdc.cam.ac.uk/data\\_request/cif](http://www.ccdc.cam.ac.uk/data_request/cif).

**Table S3 Crystal data and structure refinement for CCDC 1956109.**

|                                       |                        |
|---------------------------------------|------------------------|
| Empirical formula                     | $C_{20}H_{17}BrN_2O_3$ |
| Formula weight                        | 413.26                 |
| Temperature/K                         | 293(2)                 |
| Crystal system                        | monoclinic             |
| Space group                           | $P2_1/c$               |
| $a/\text{\AA}$                        | 16.6385(13)            |
| $b/\text{\AA}$                        | 14.3268(8)             |
| $c/\text{\AA}$                        | 7.7041(5)              |
| $\alpha/^\circ$                       | 90                     |
| $\beta/^\circ$                        | 100.731(7)             |
| $\gamma/^\circ$                       | 90                     |
| Volume/ $\text{\AA}^3$                | 1804.3(2)              |
| $Z$                                   | 4                      |
| $\rho_{\text{calc}}/\text{g cm}^{-3}$ | 1.521                  |
| $\mu/\text{mm}^{-1}$                  | 3.296                  |
| $F(000)$                              | 840.0                  |

|                                             |                                                               |
|---------------------------------------------|---------------------------------------------------------------|
| Crystal size/mm <sup>3</sup>                | 0.19 × 0.14 × 0.11                                            |
| Radiation                                   | CuKα (λ = 1.54184)                                            |
| 2θ range for data collection/°              | 8.206 to 134.16                                               |
| Index ranges                                | -19 ≤ h ≤ 13, -17 ≤ k ≤ 16, -8 ≤ l ≤ 9                        |
| Reflections collected                       | 6920                                                          |
| Independent reflections                     | 3221 [R <sub>int</sub> = 0.0468, R <sub>sigma</sub> = 0.0652] |
| Data/restraints/parameters                  | 3221/0/242                                                    |
| Goodness-of-fit on F <sup>2</sup>           | 1.053                                                         |
| Final R indexes [I ≥ 2σ (I)]                | R <sub>1</sub> = 0.0486, wR <sub>2</sub> = 0.1062             |
| Final R indexes [all data]                  | R <sub>1</sub> = 0.0755, wR <sub>2</sub> = 0.1265             |
| Largest diff. peak/hole / e Å <sup>-3</sup> | 0.35/-0.43                                                    |

## 7. Copies of <sup>1</sup>H, <sup>13</sup>C NMR Spectra for the Products

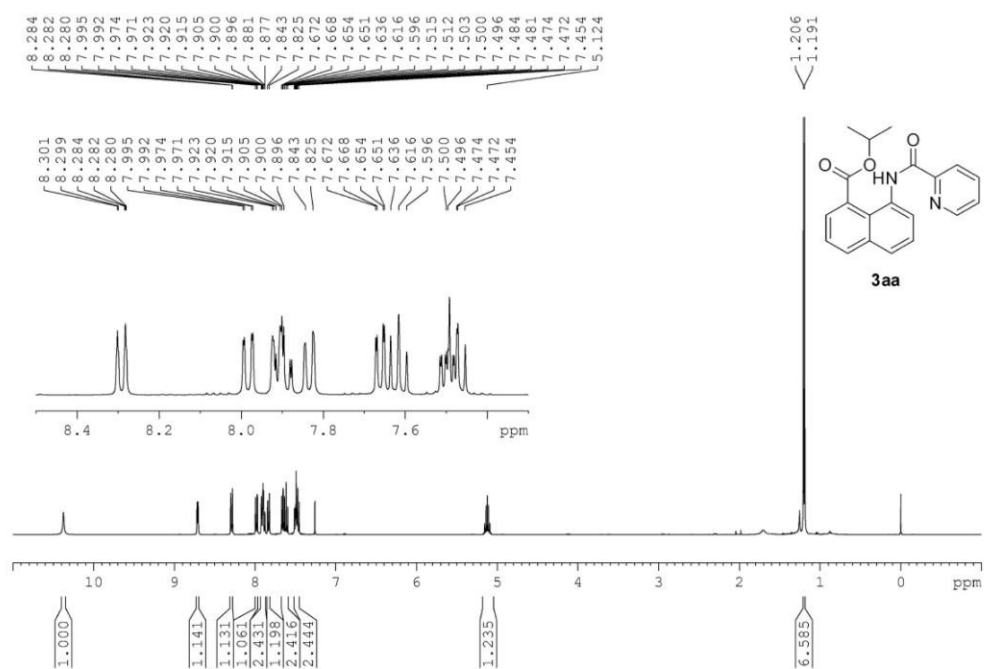

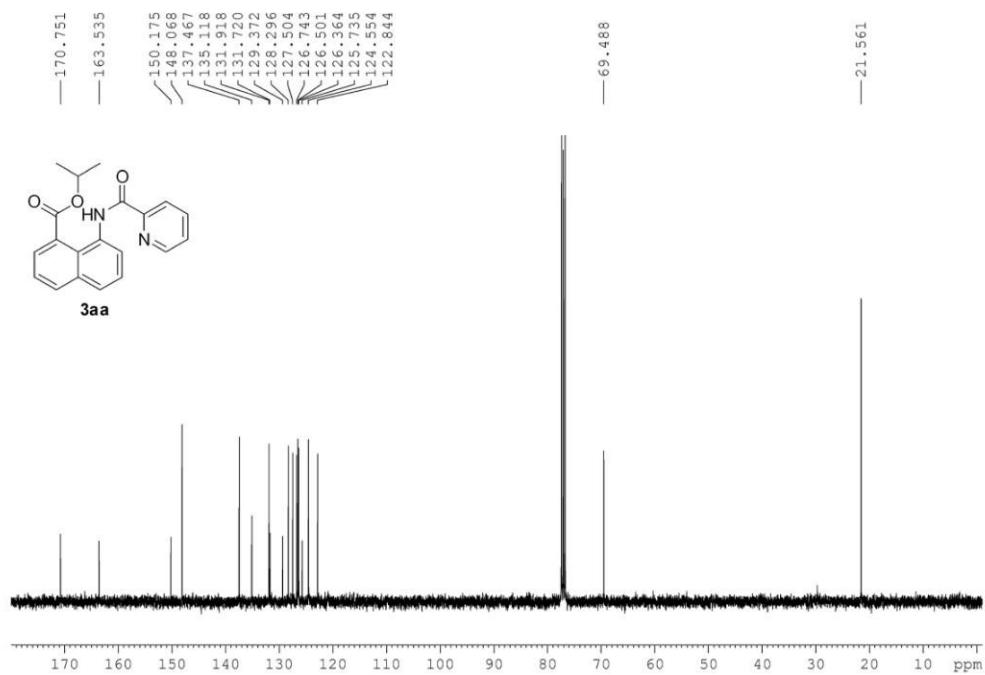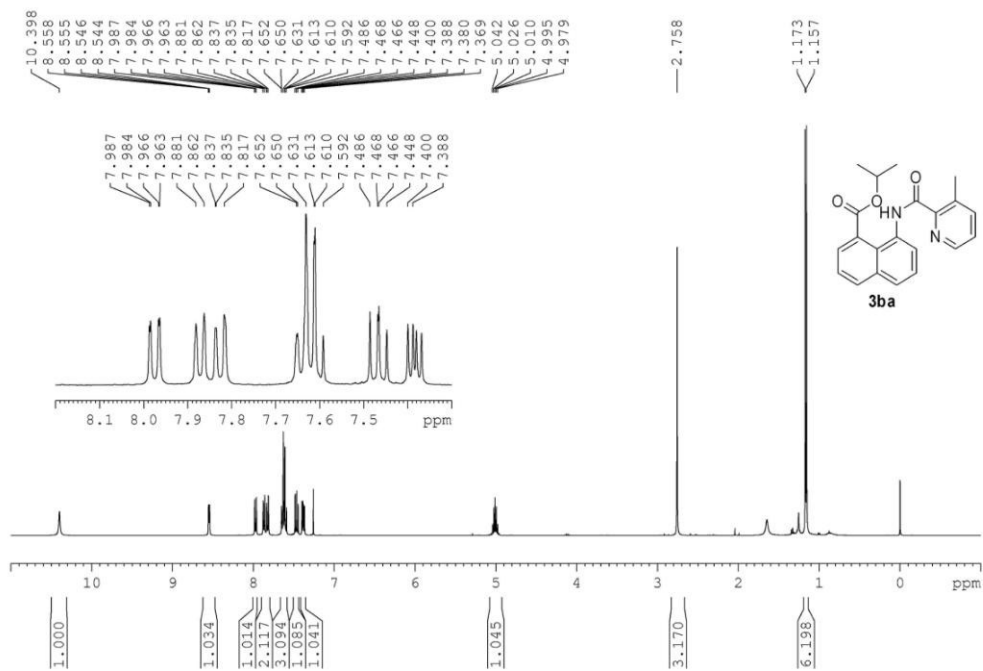

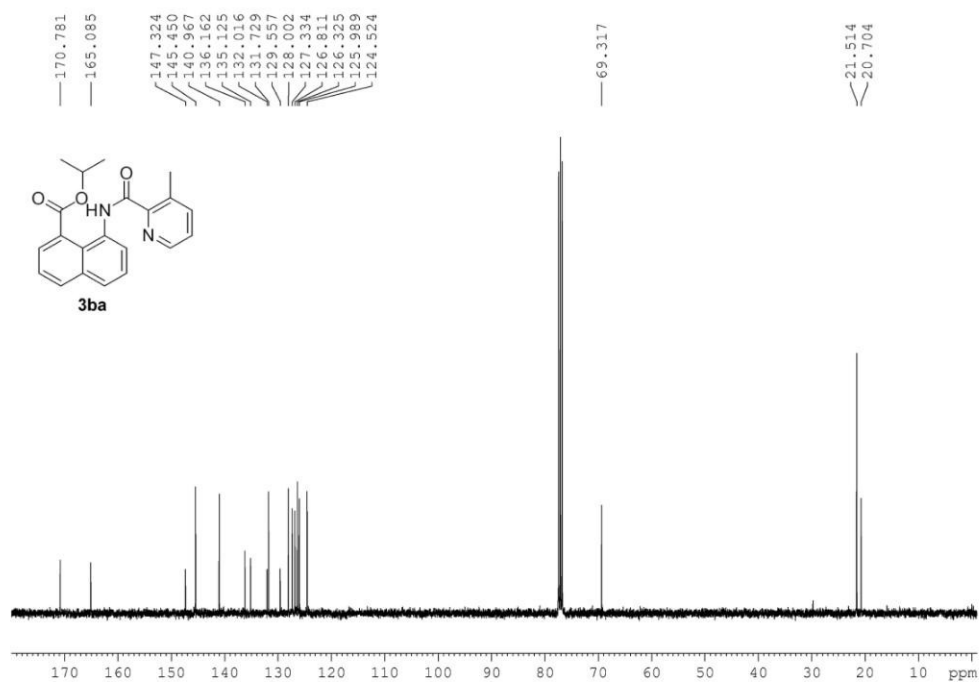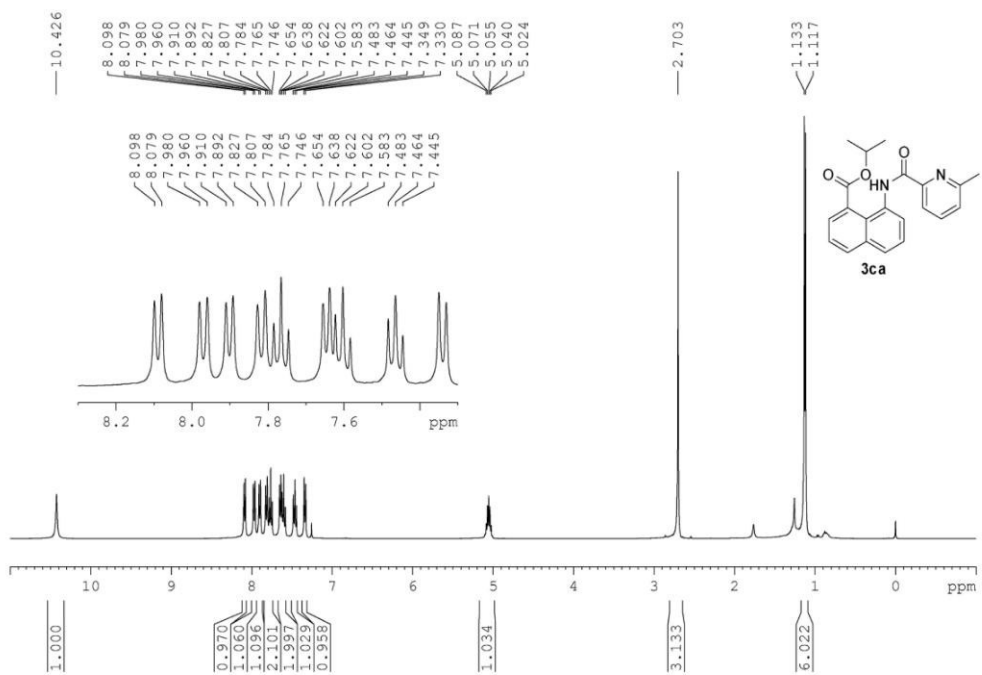

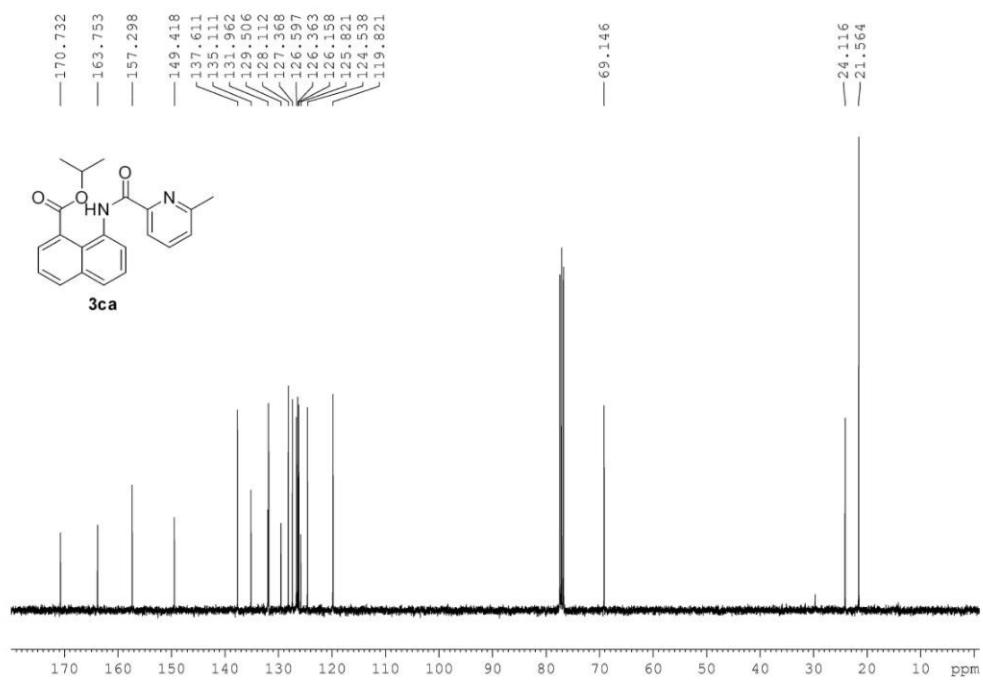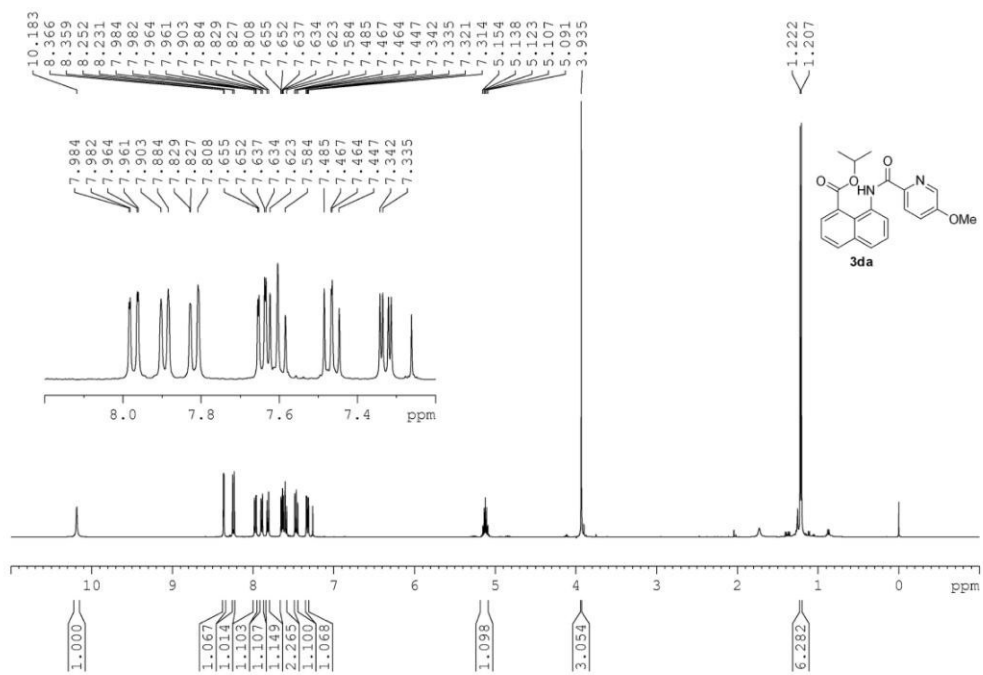

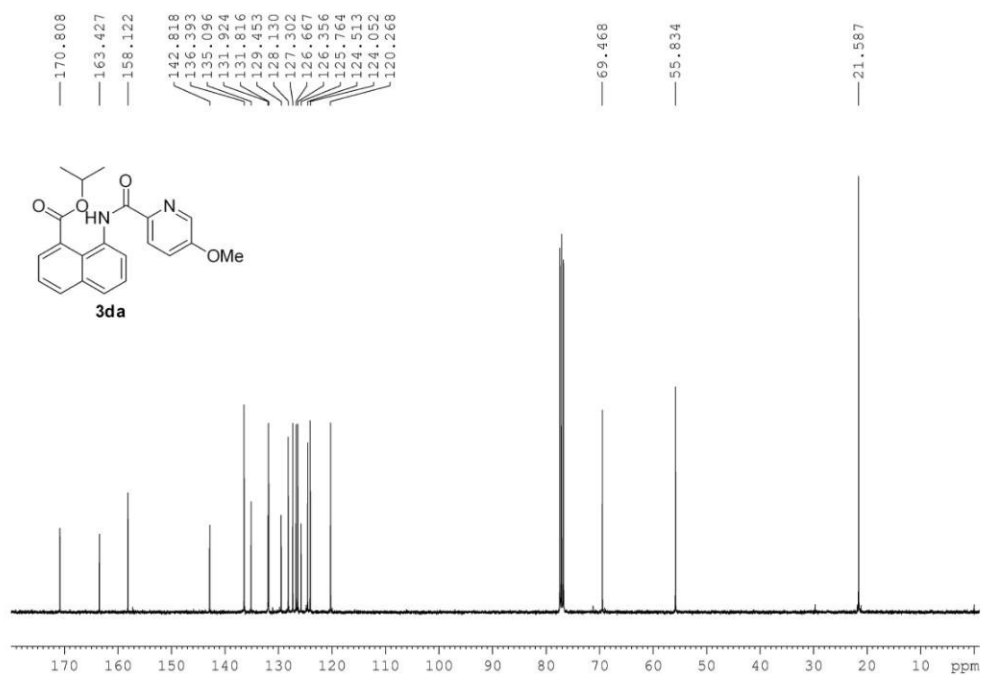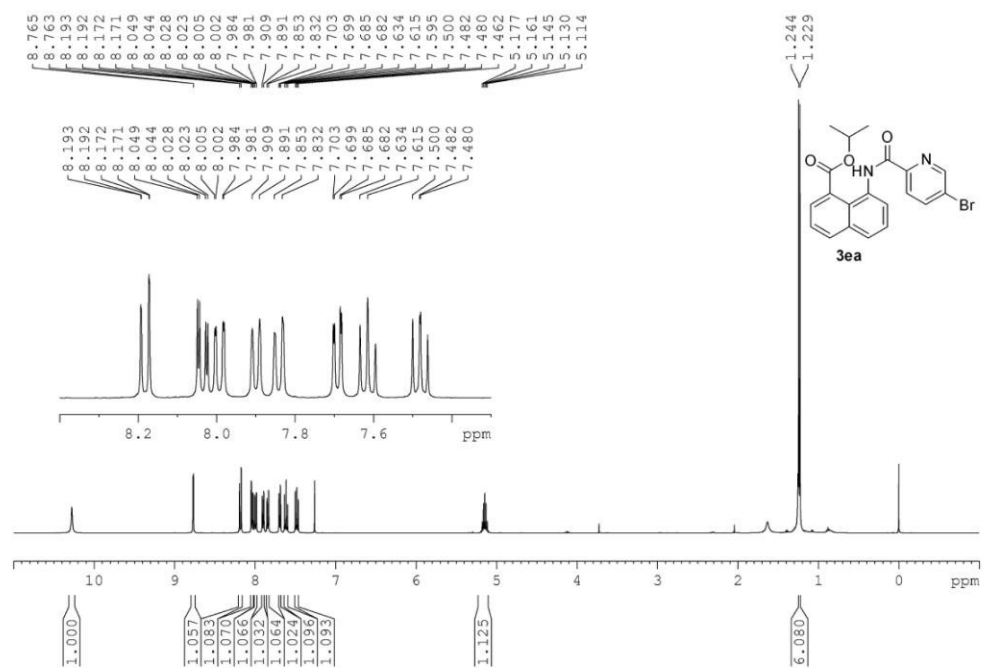



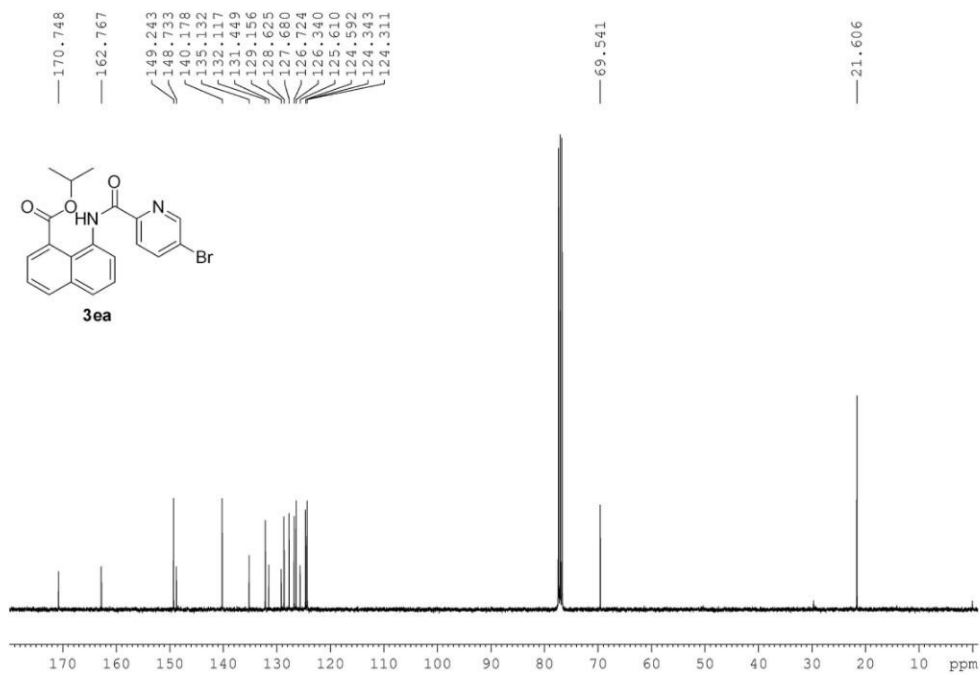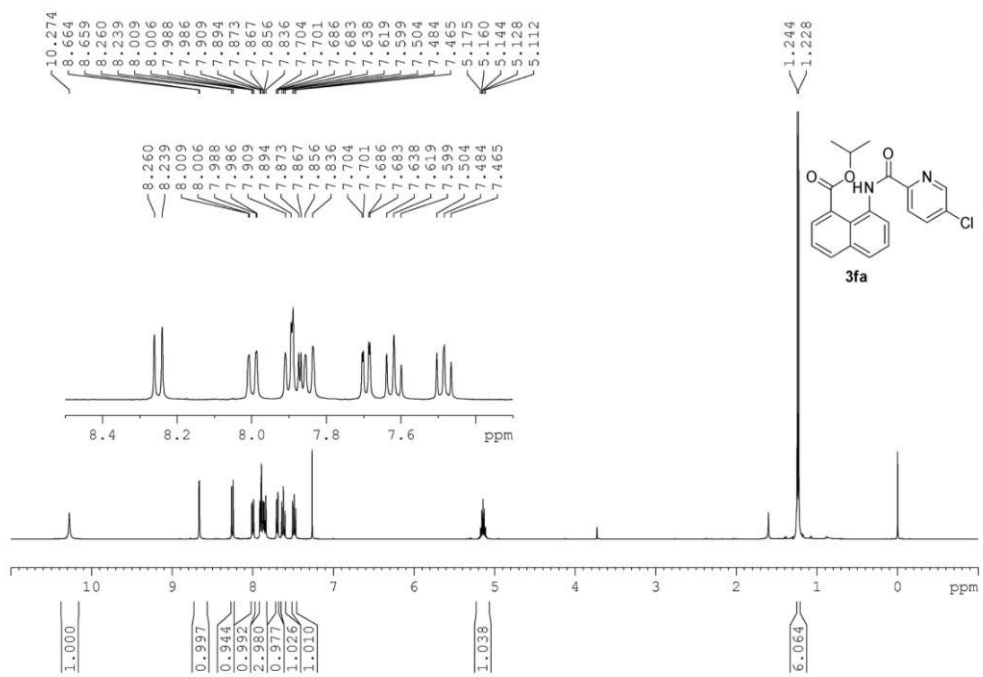

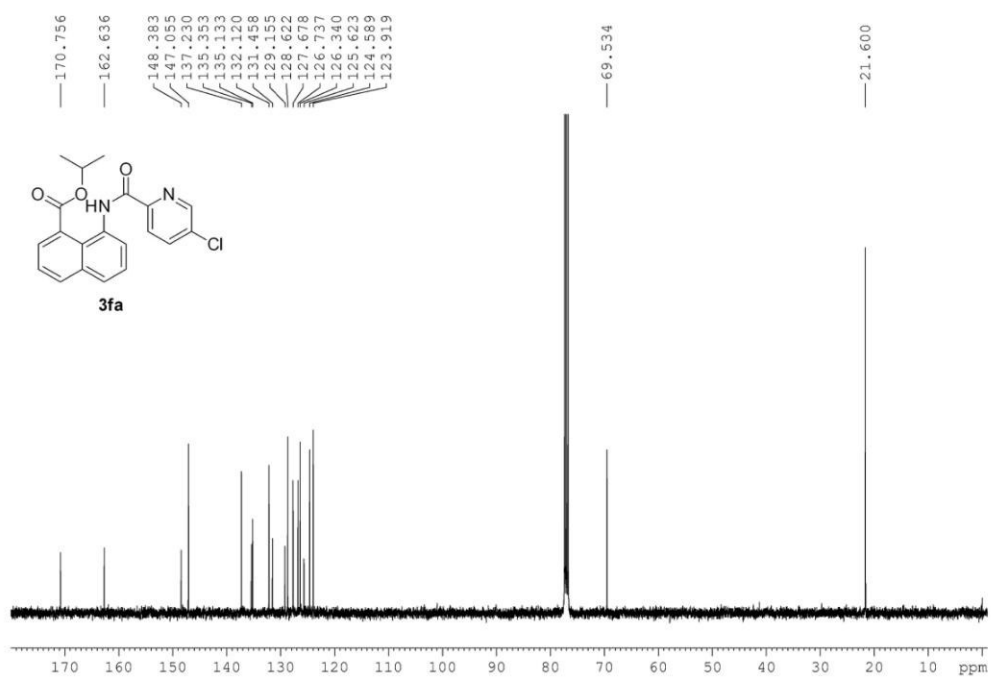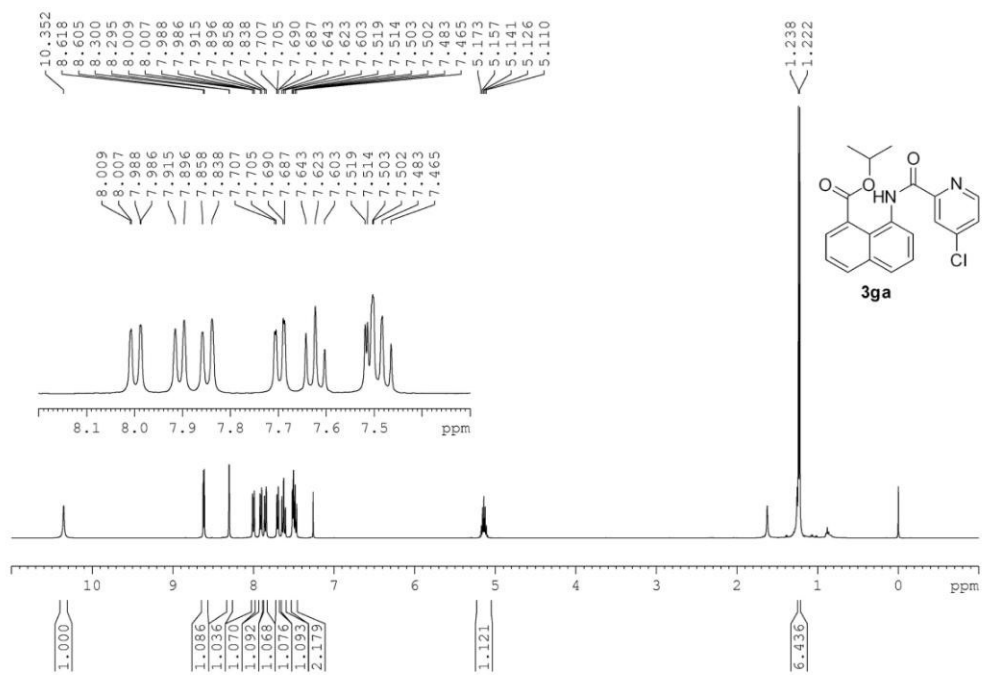

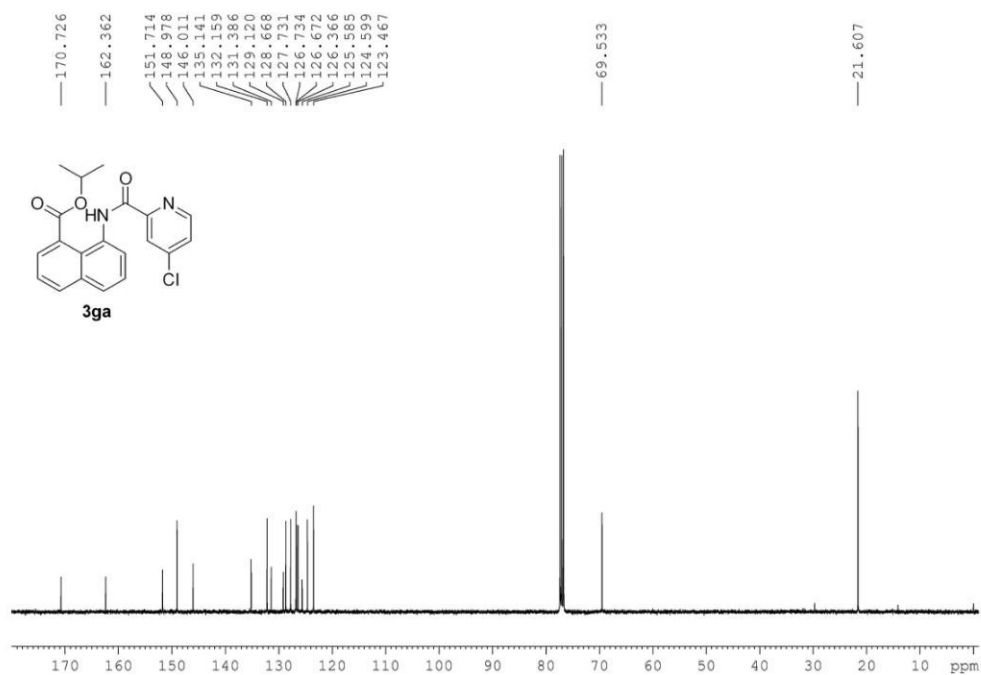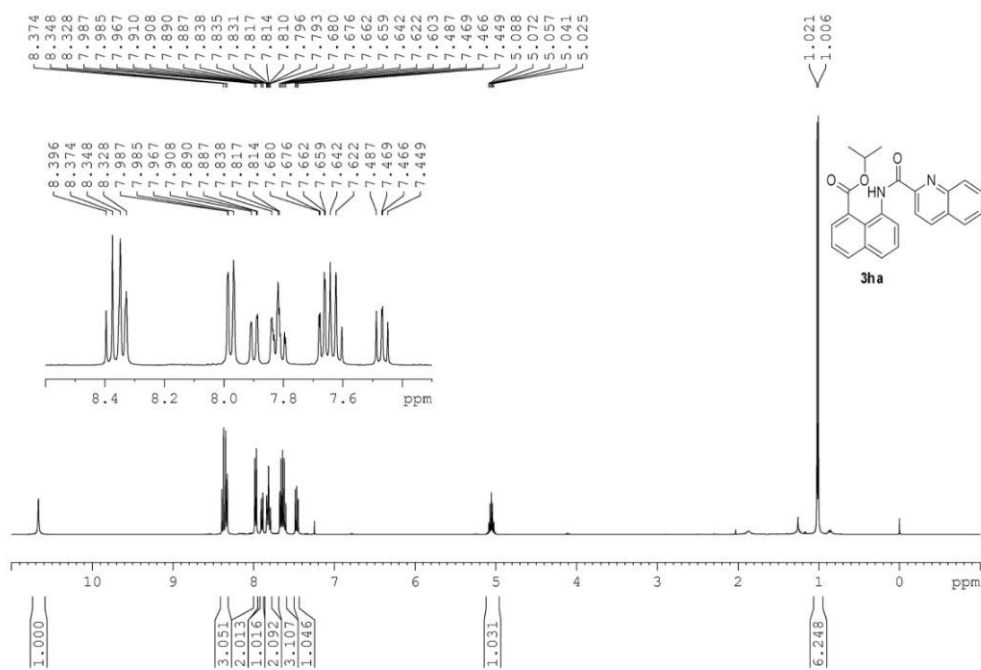

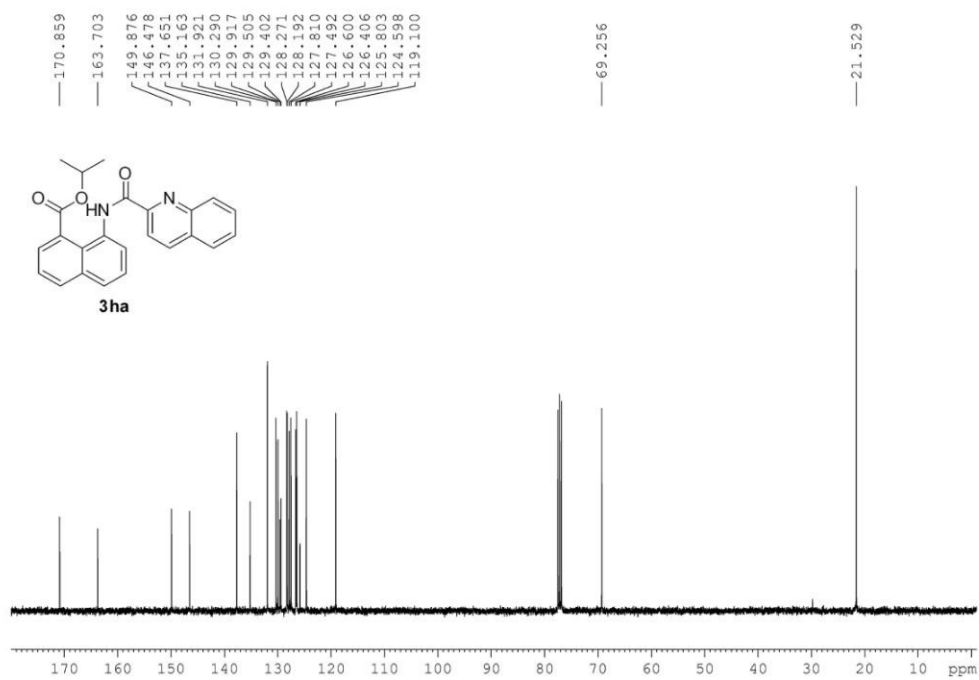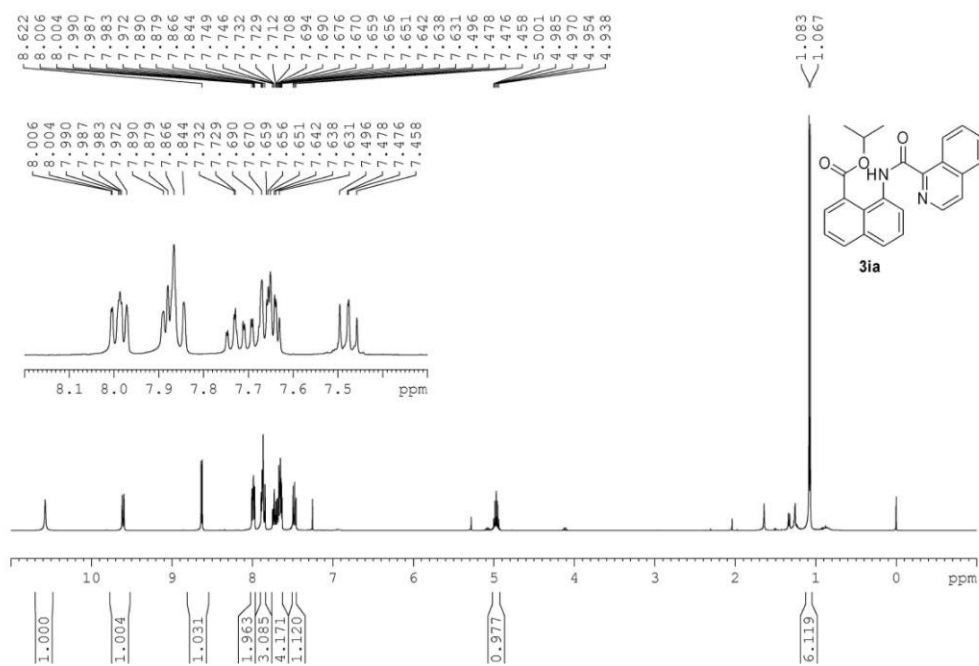

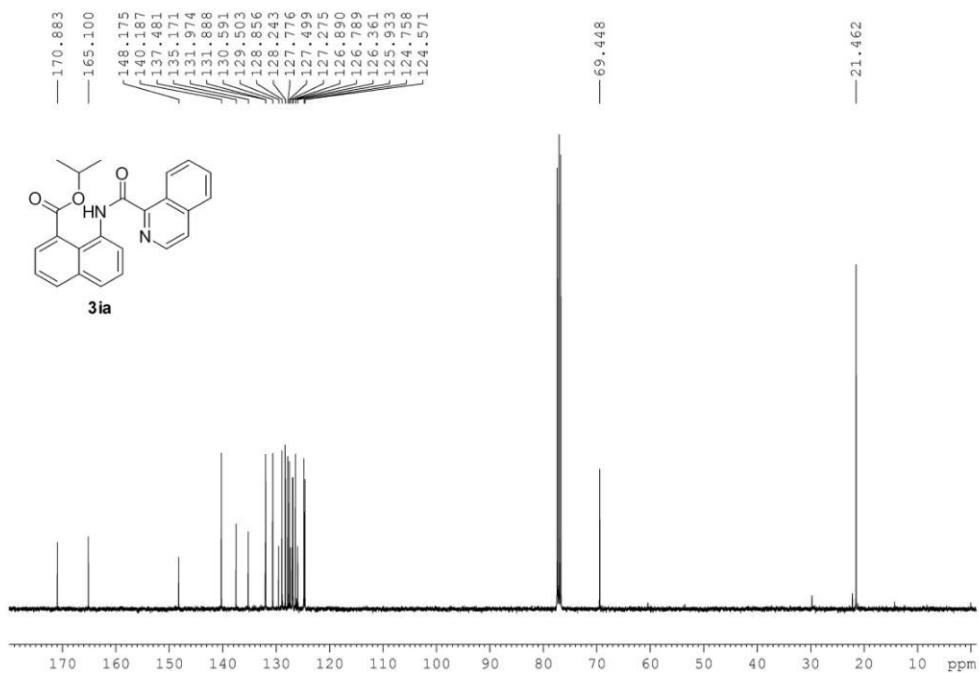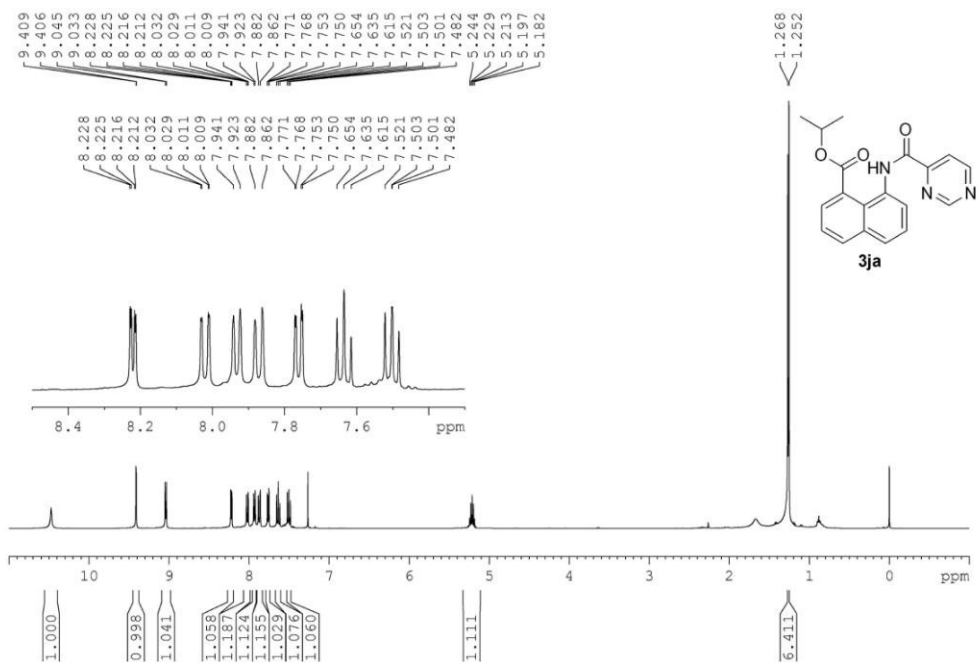

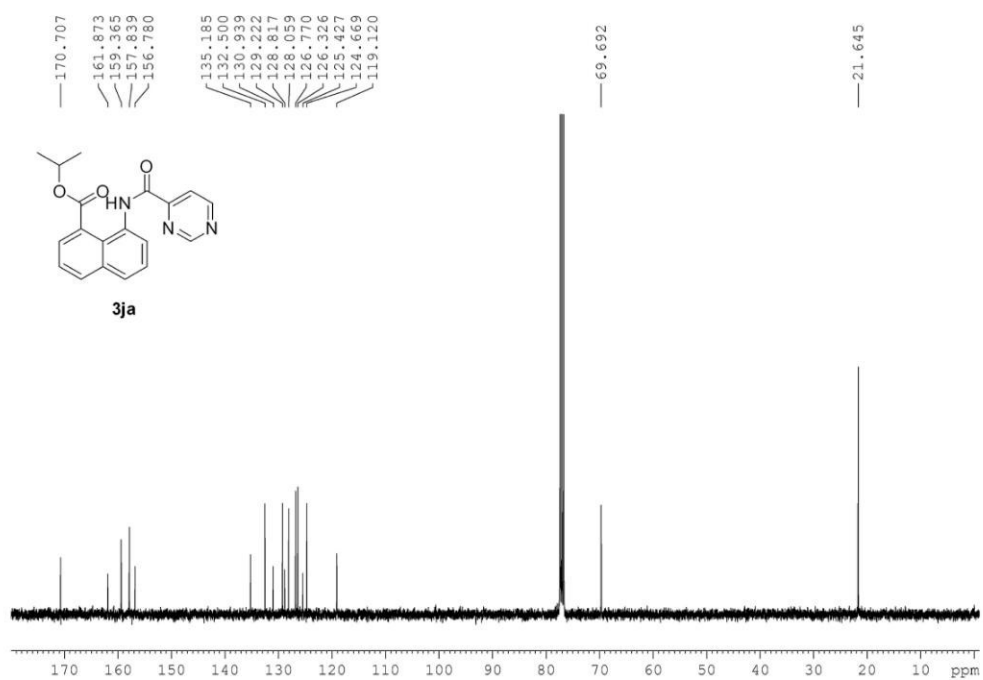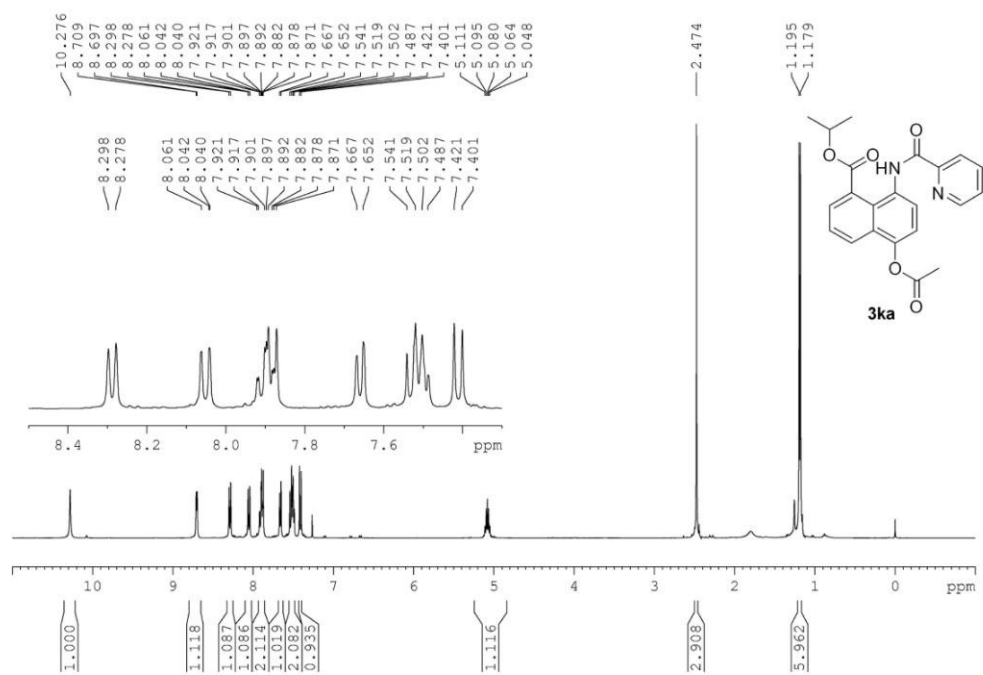

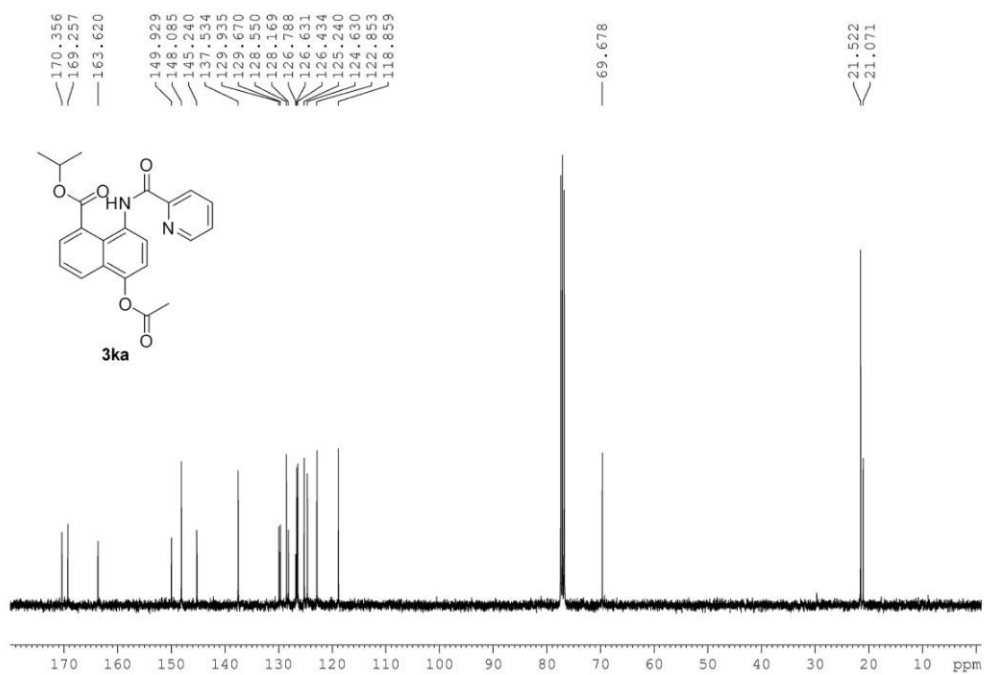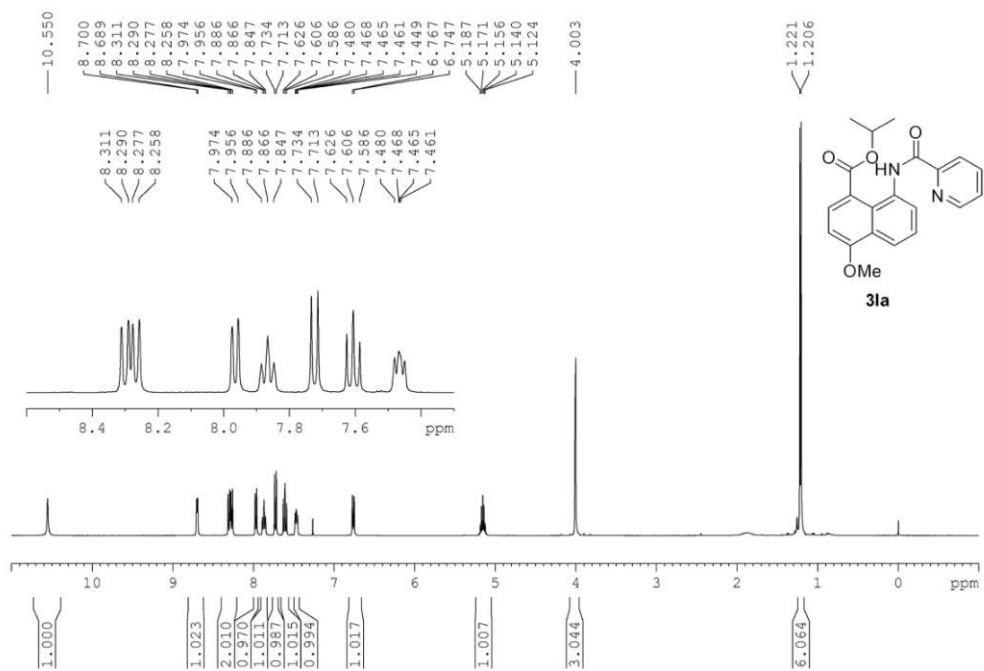

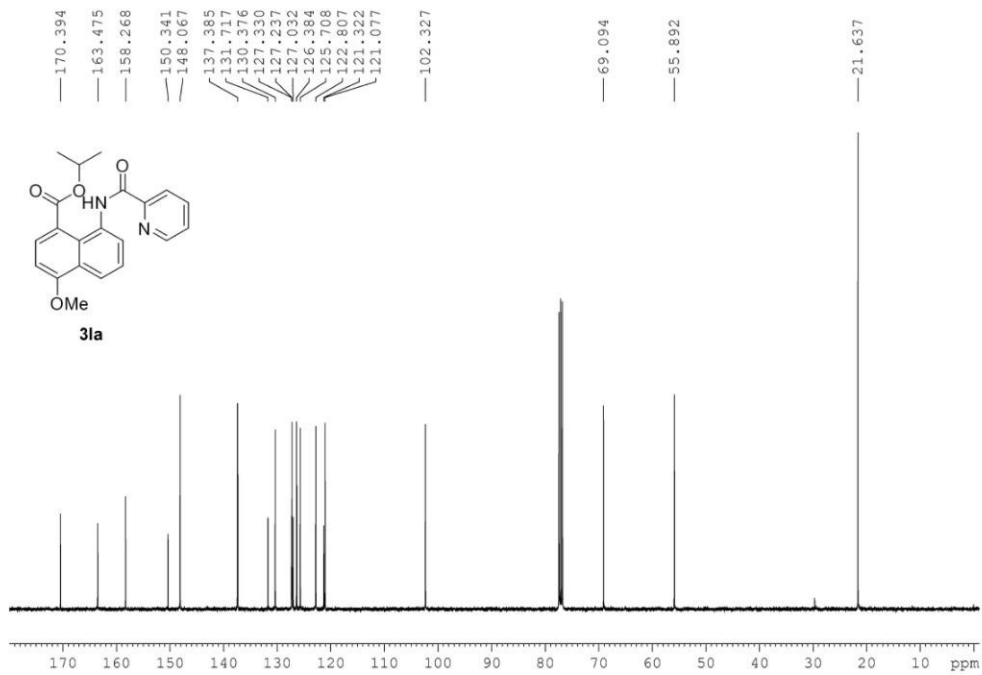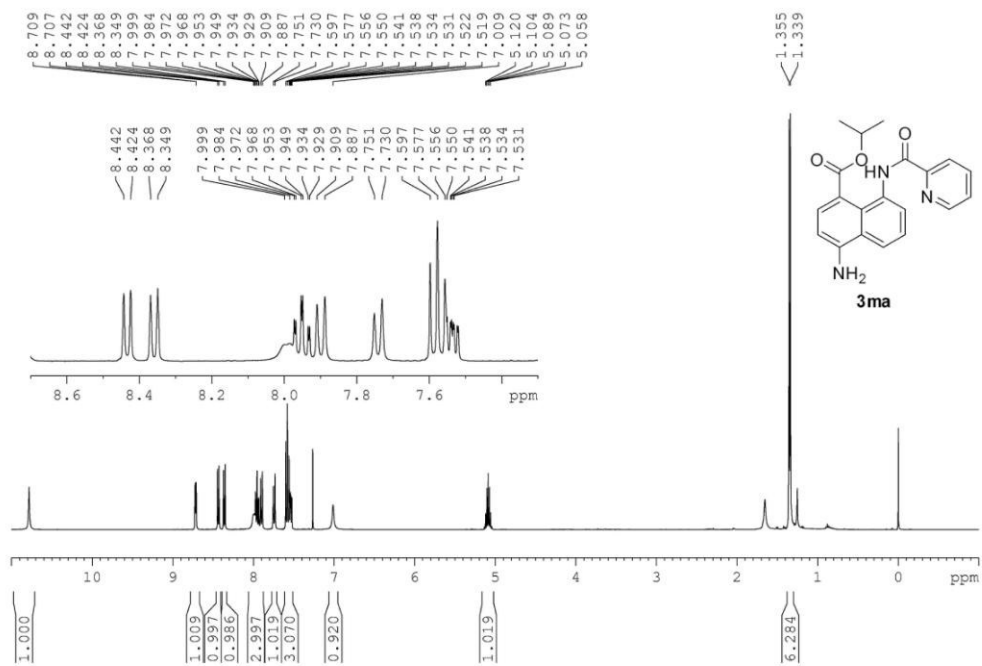



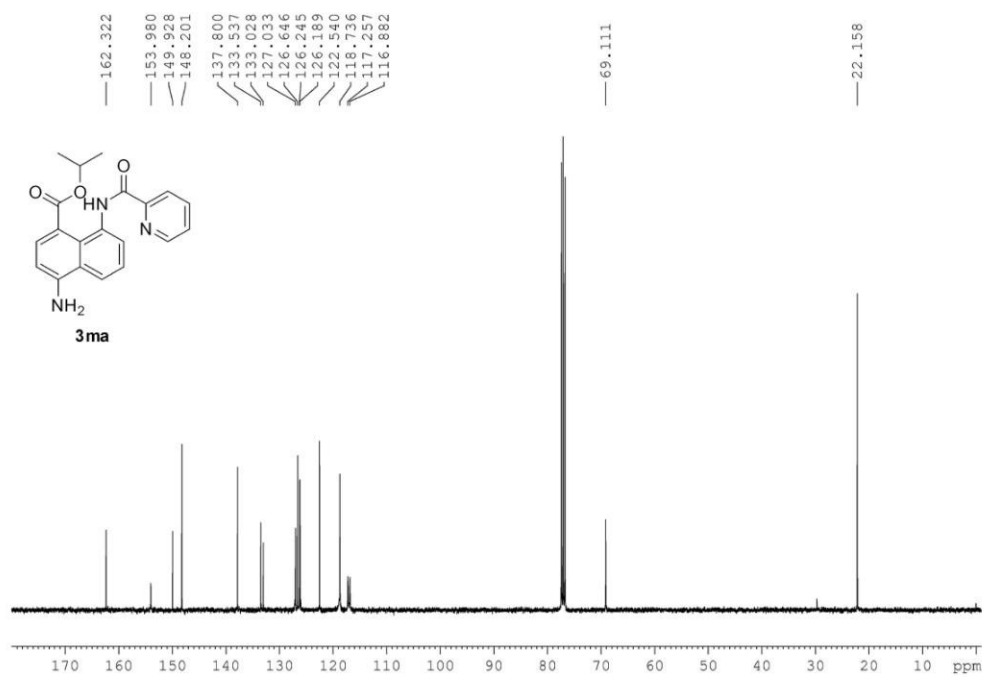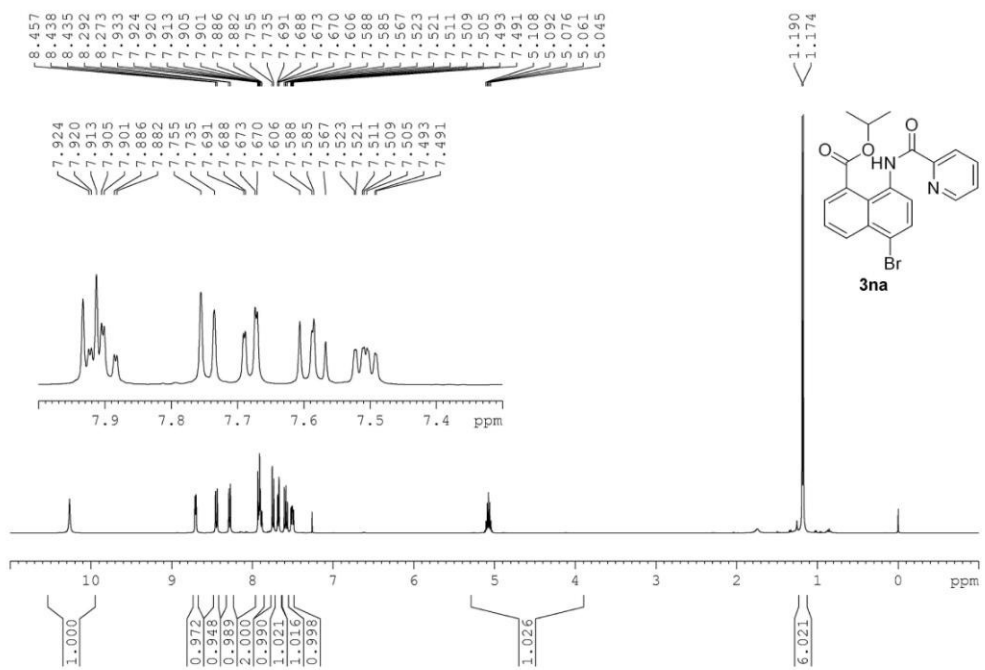

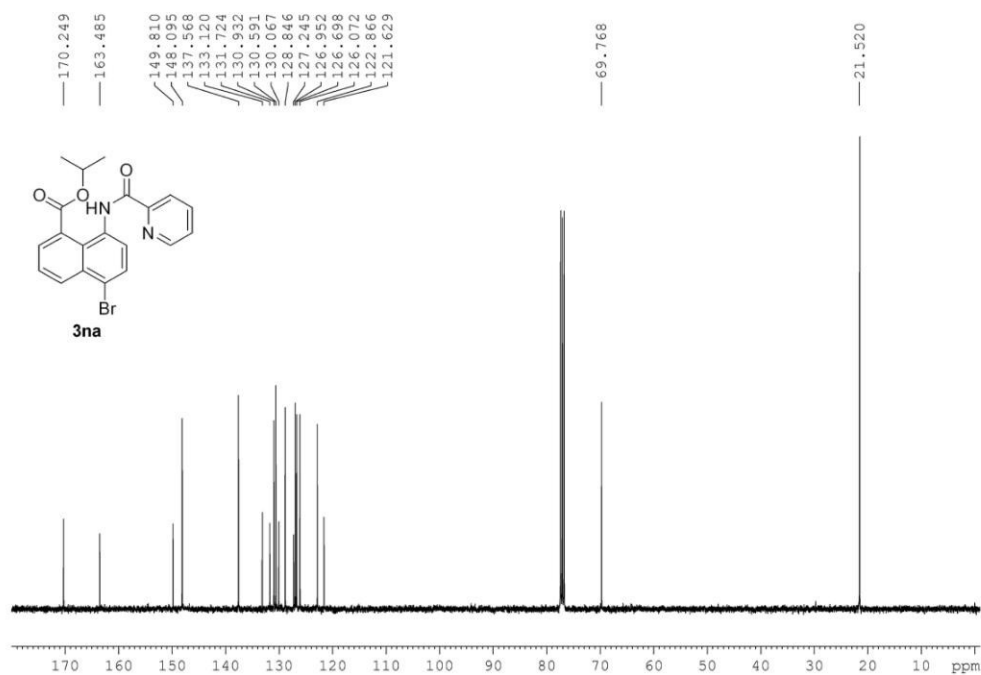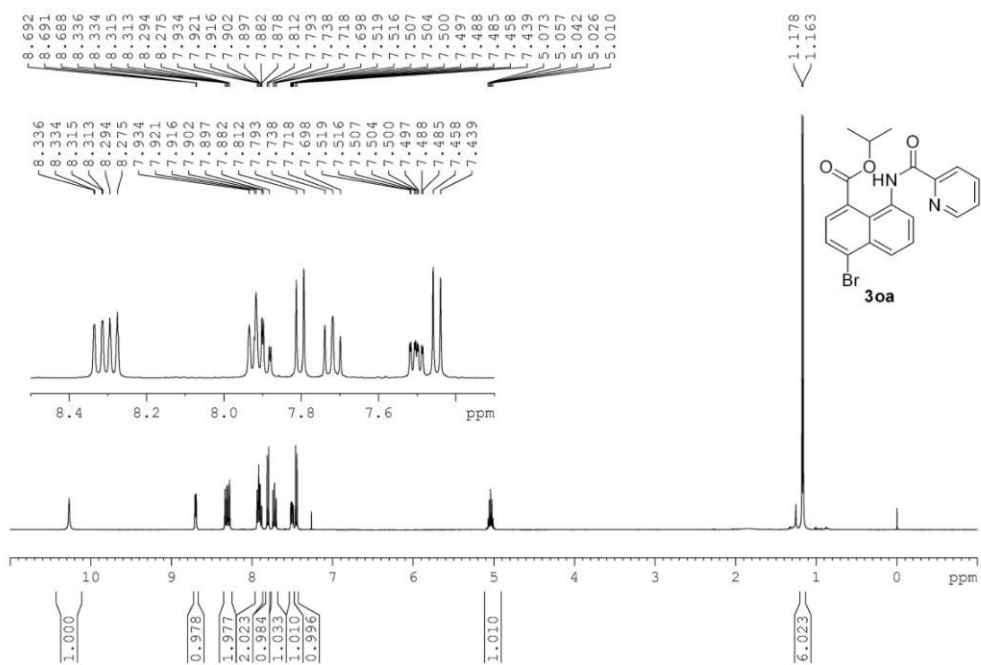

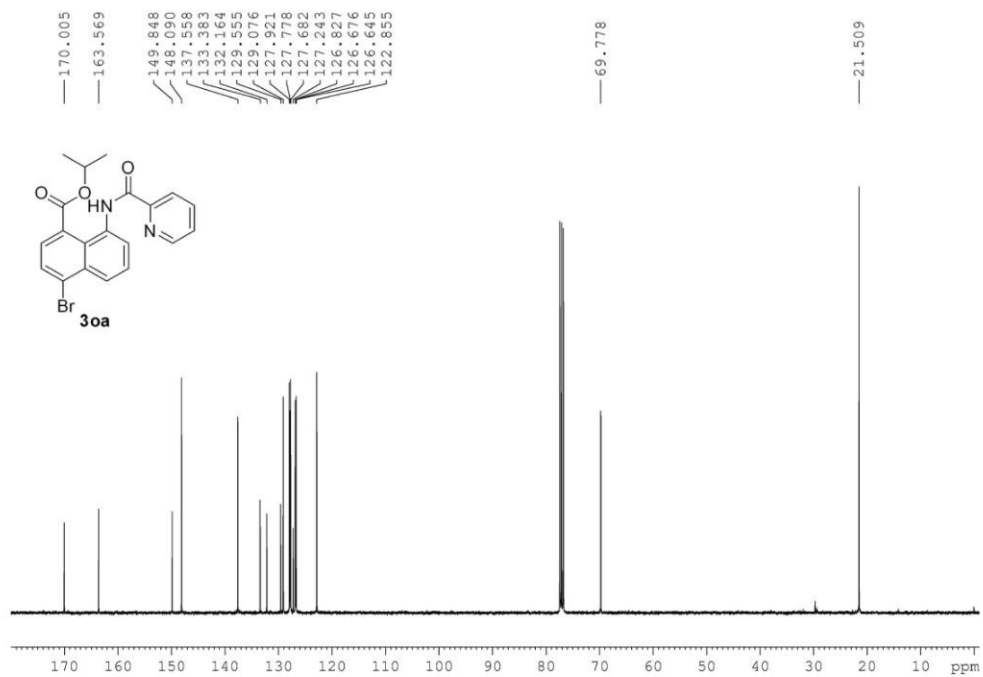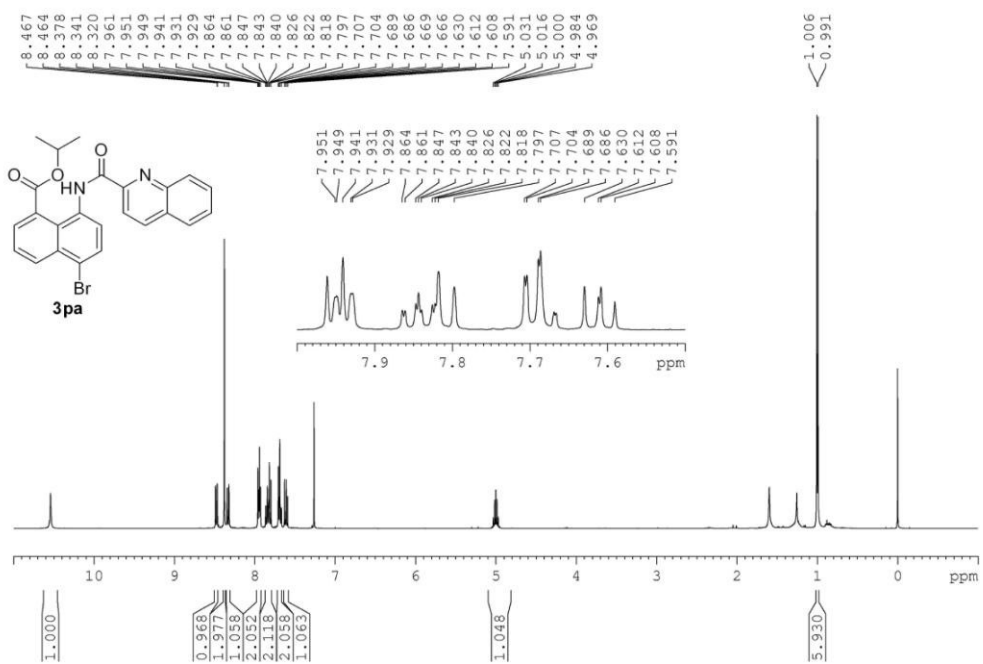



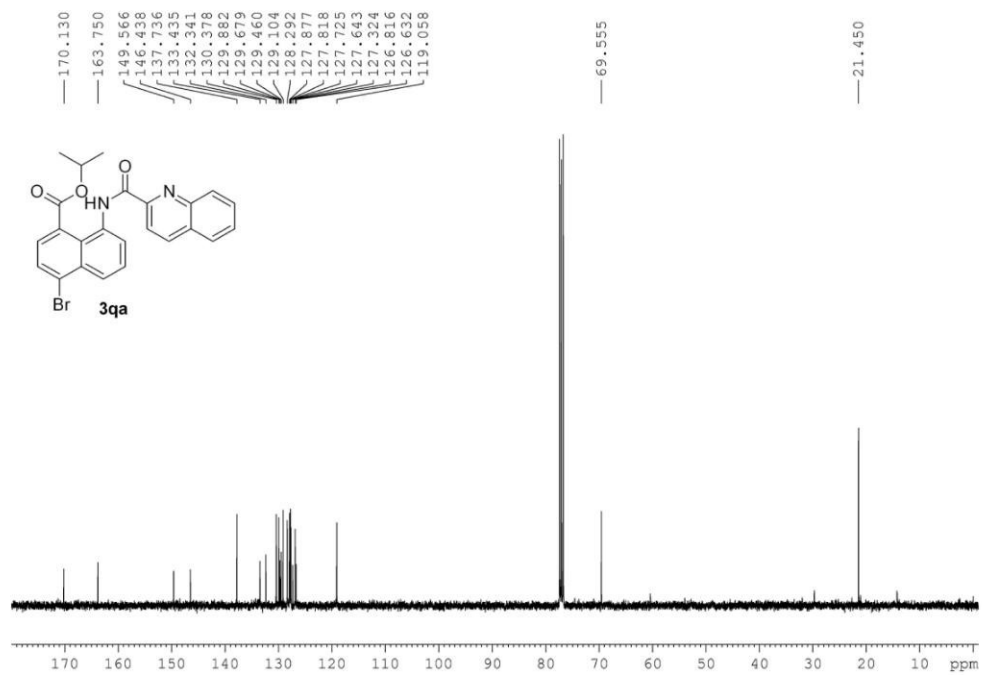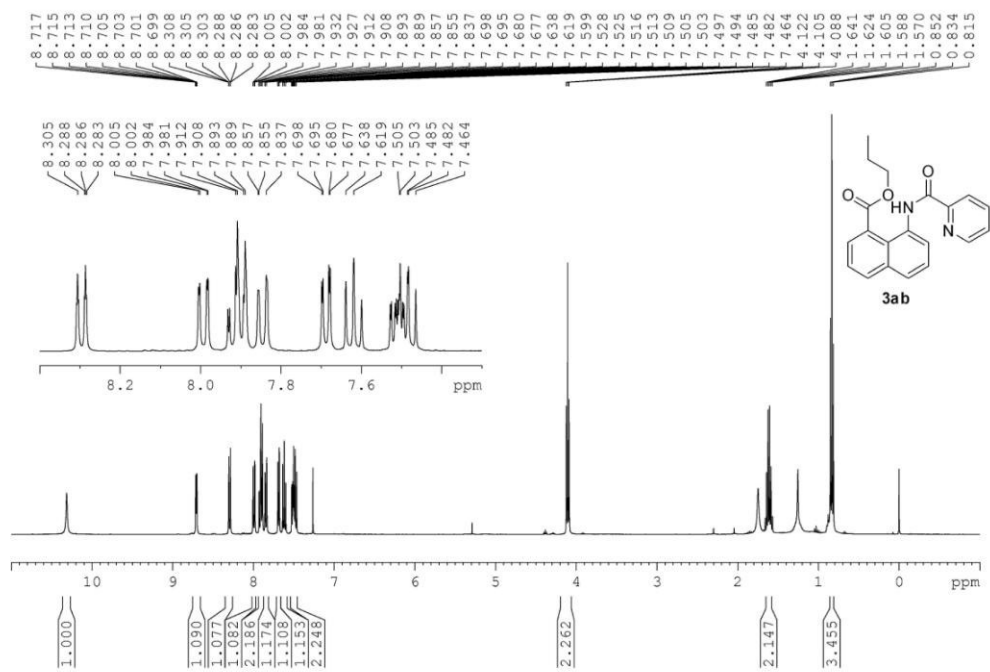

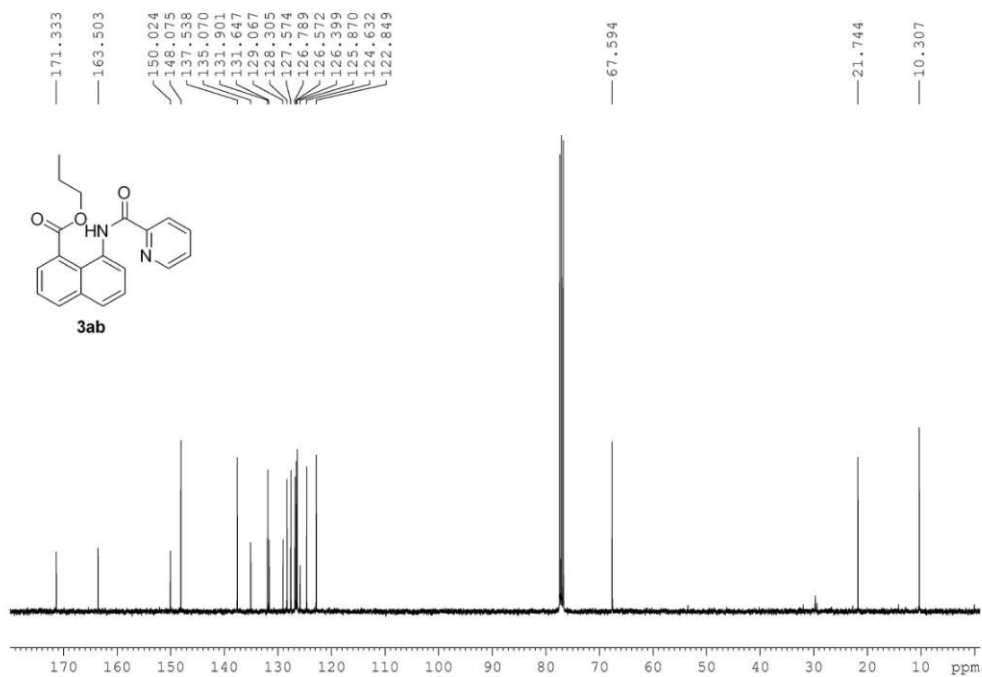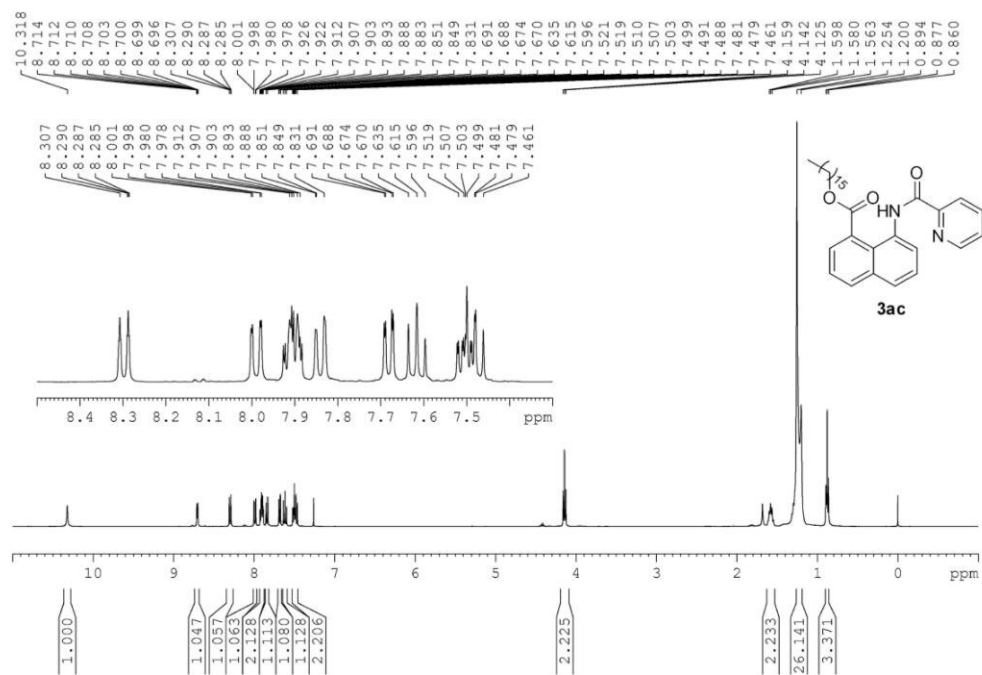

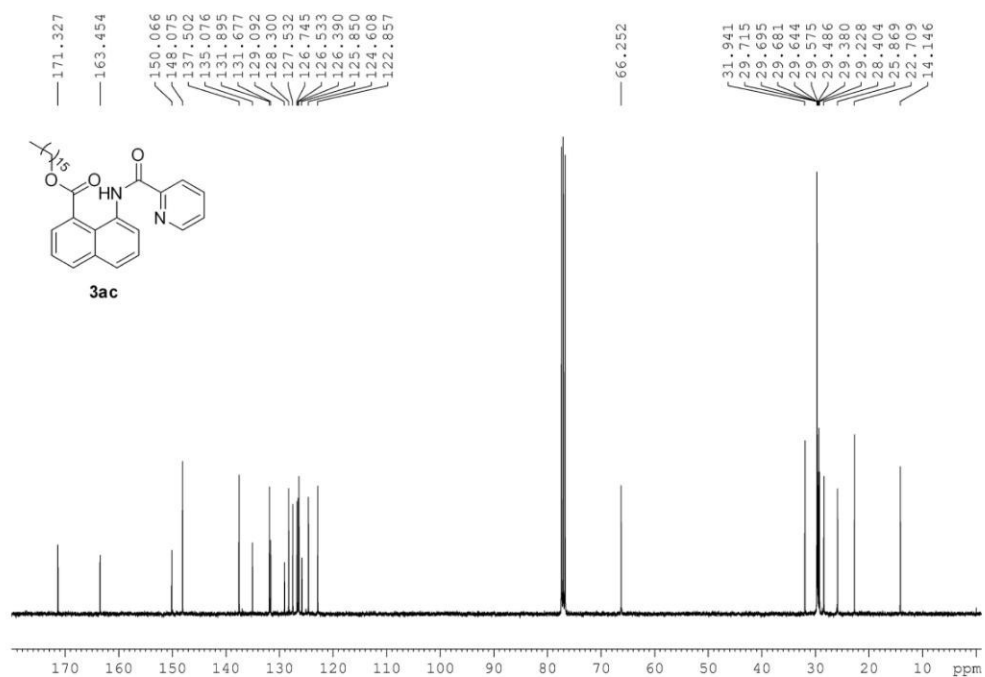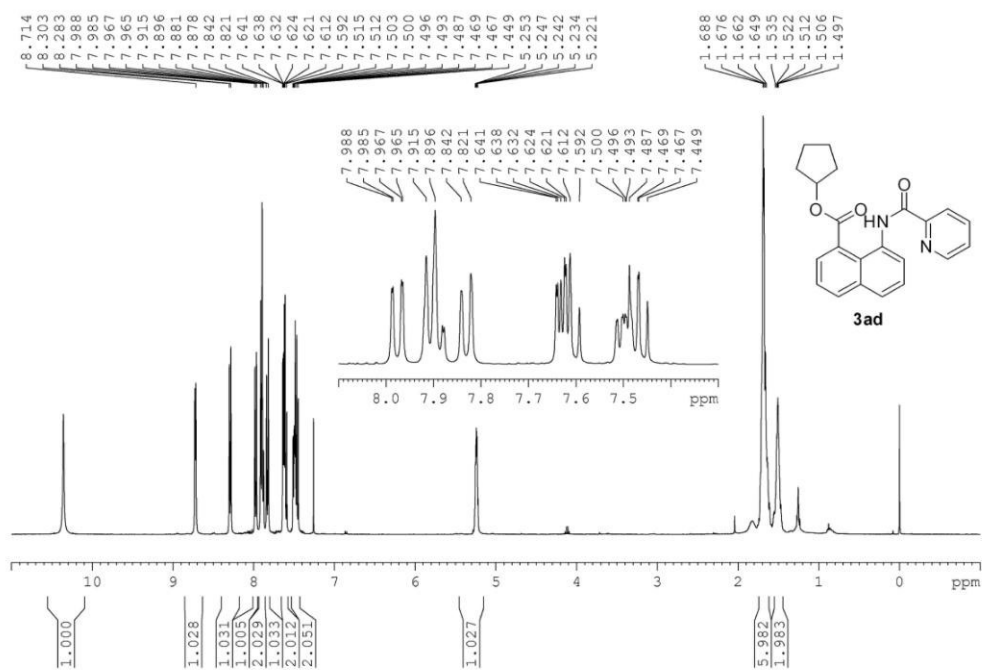

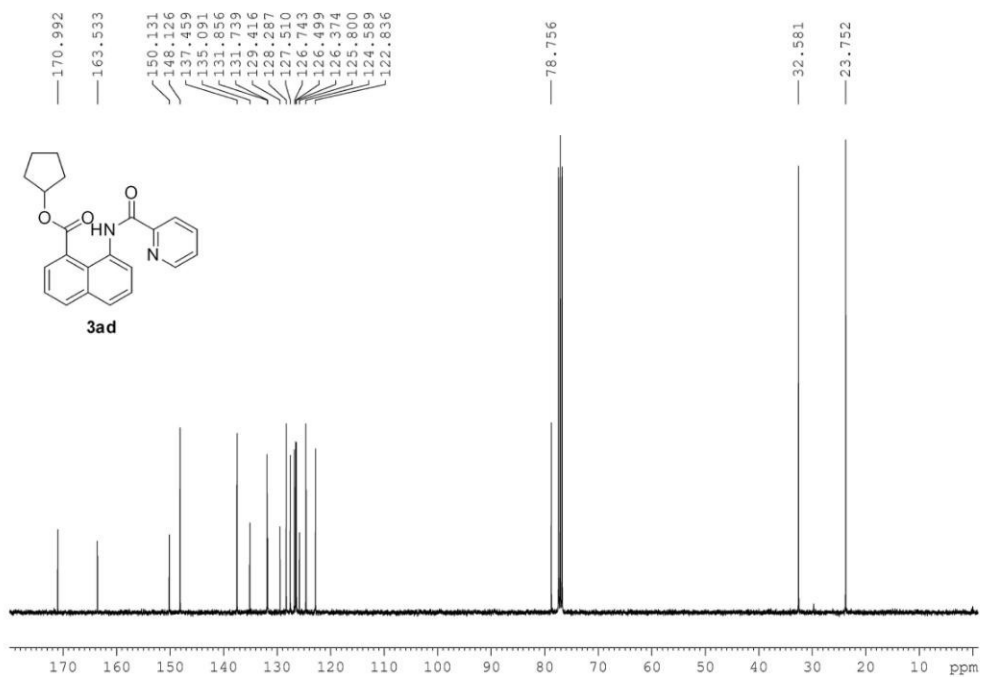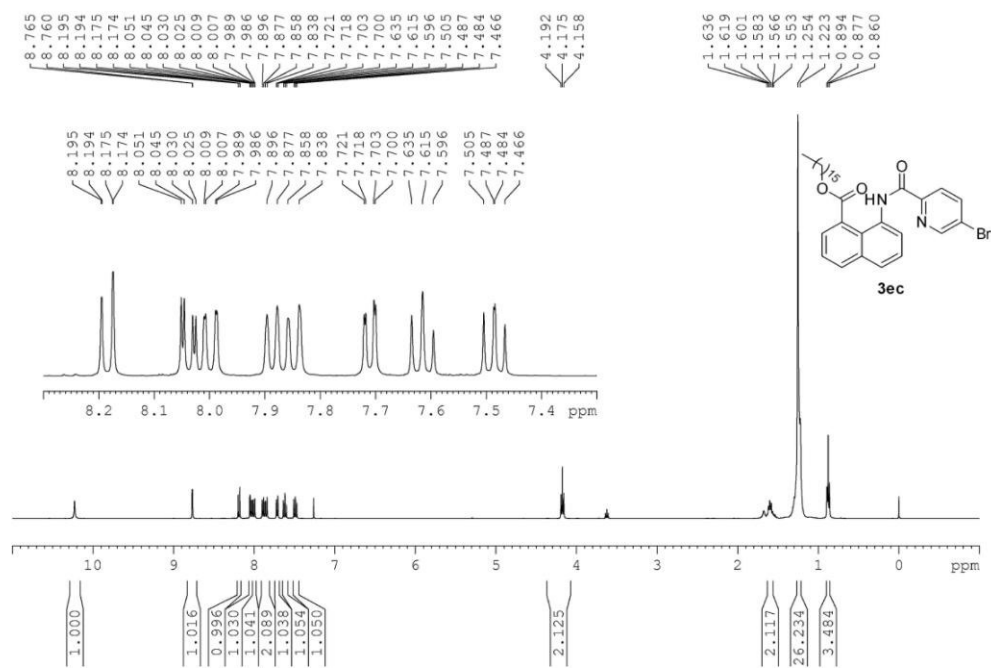



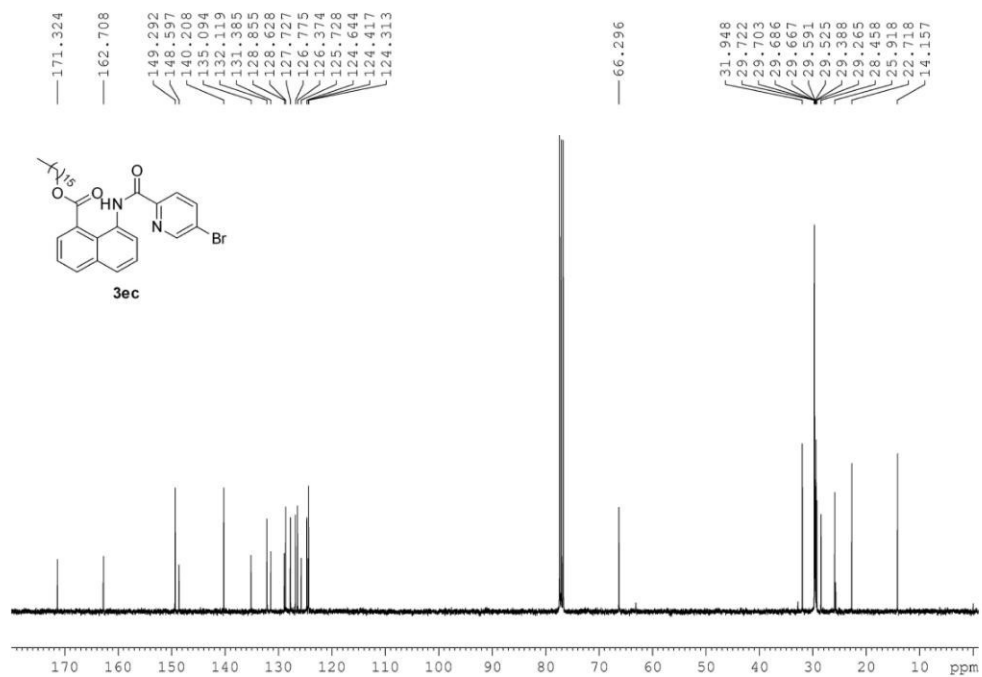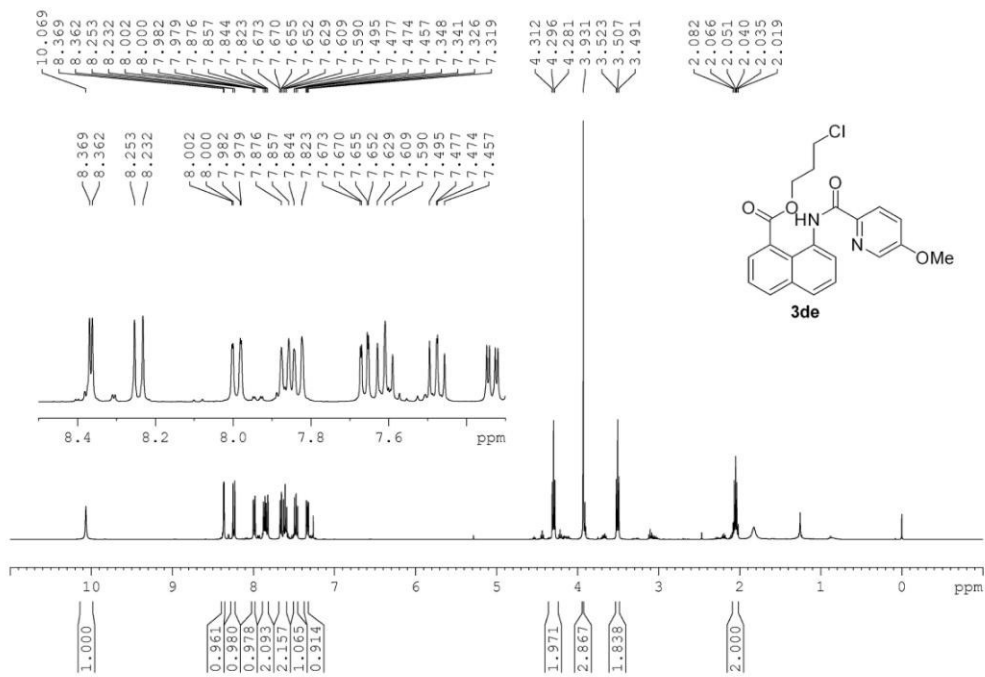

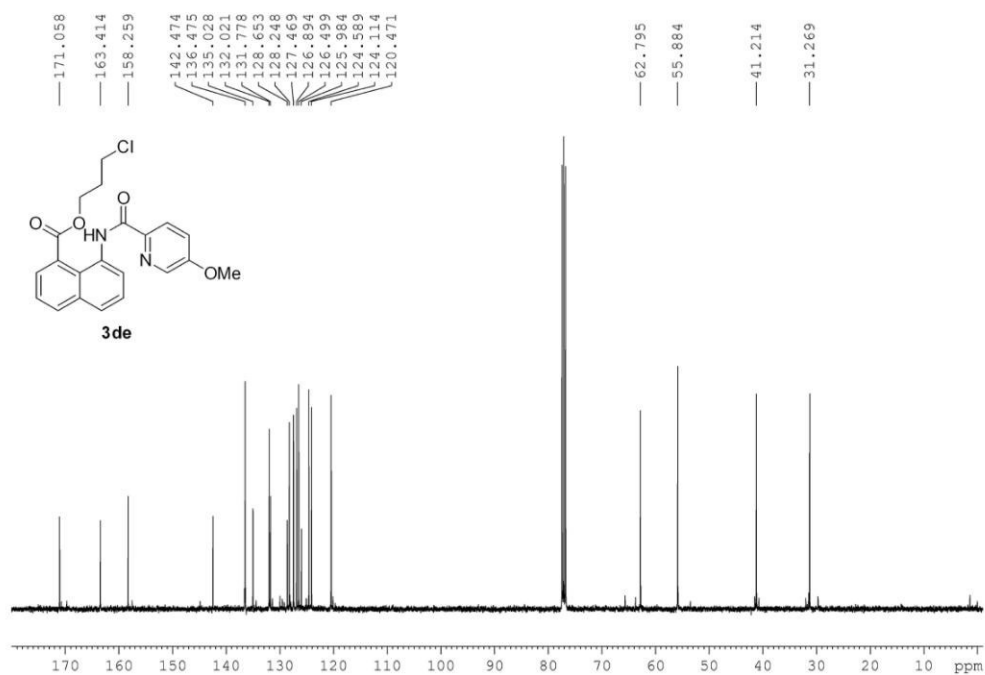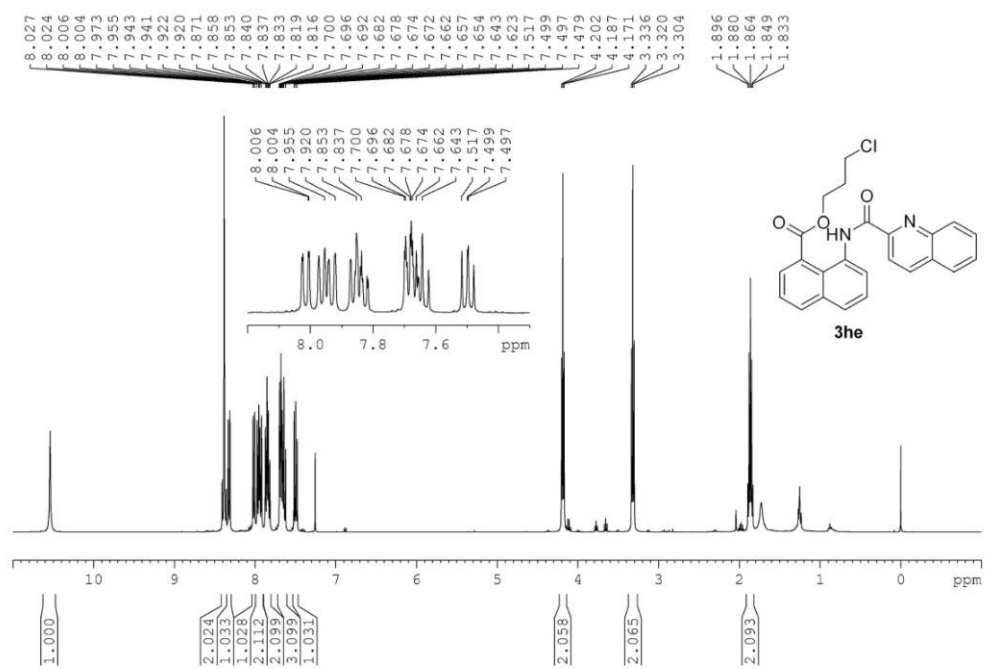

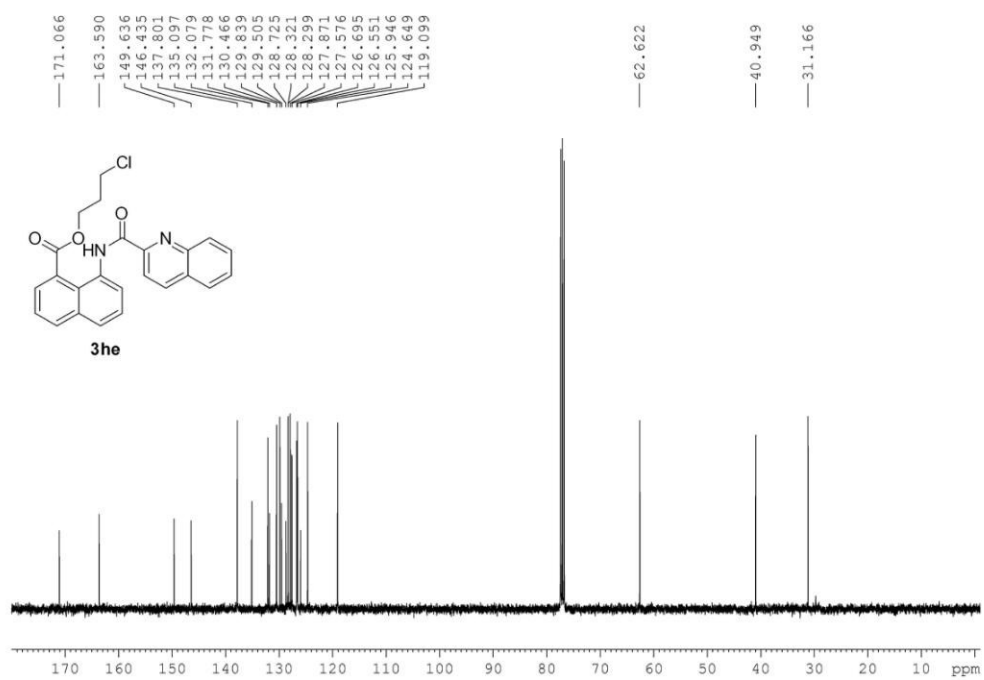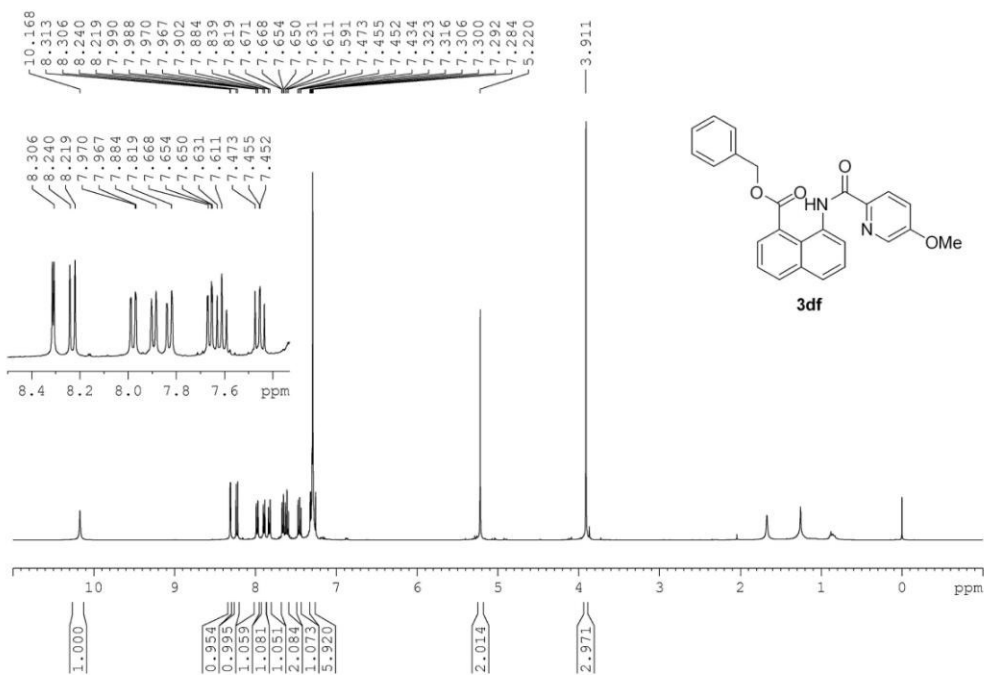

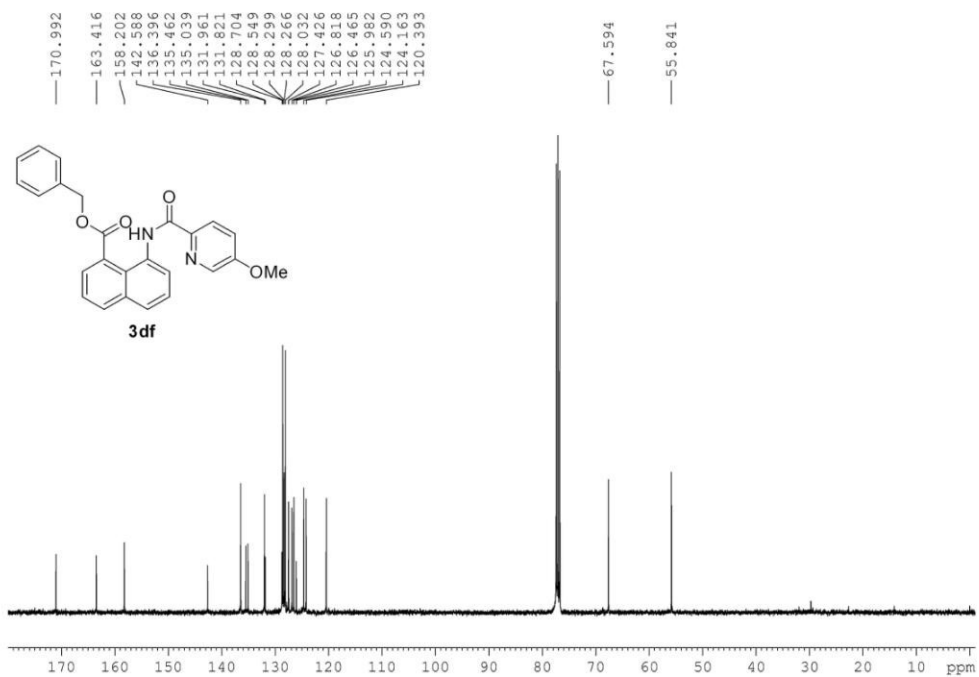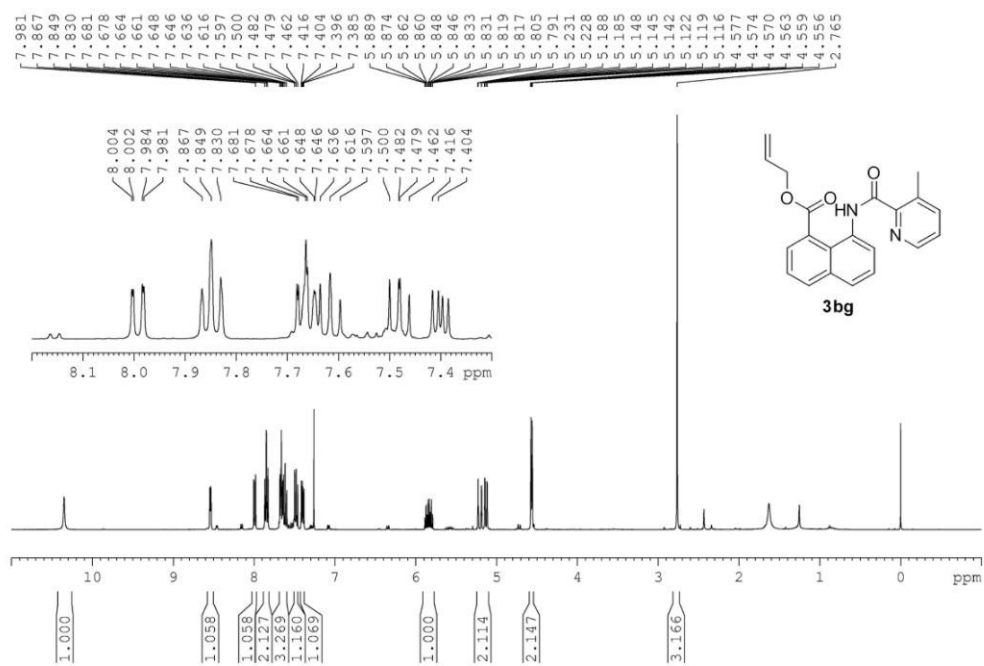

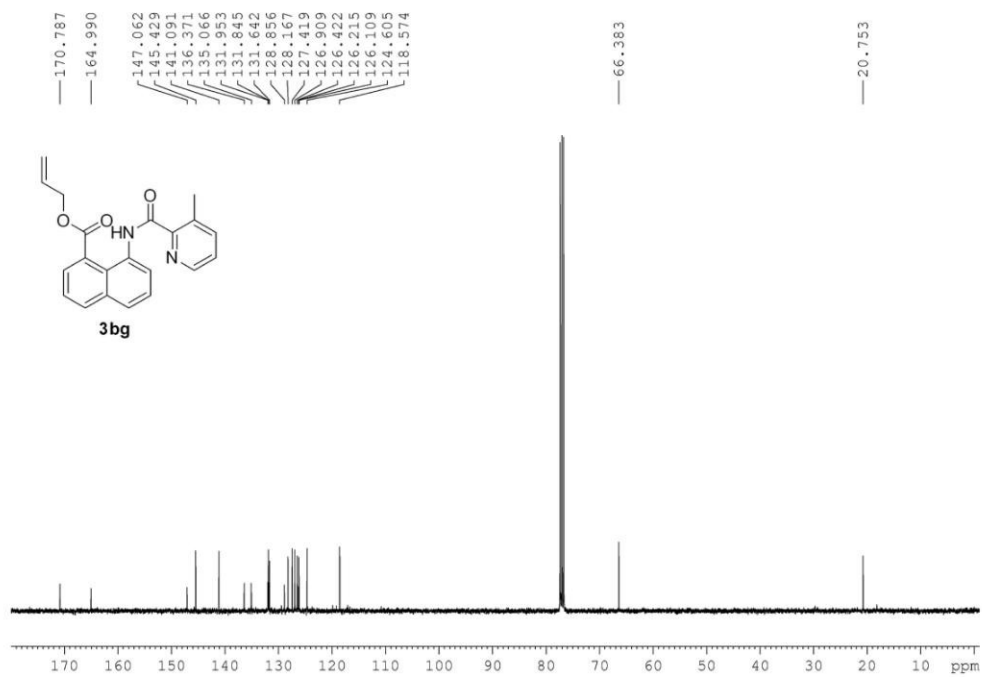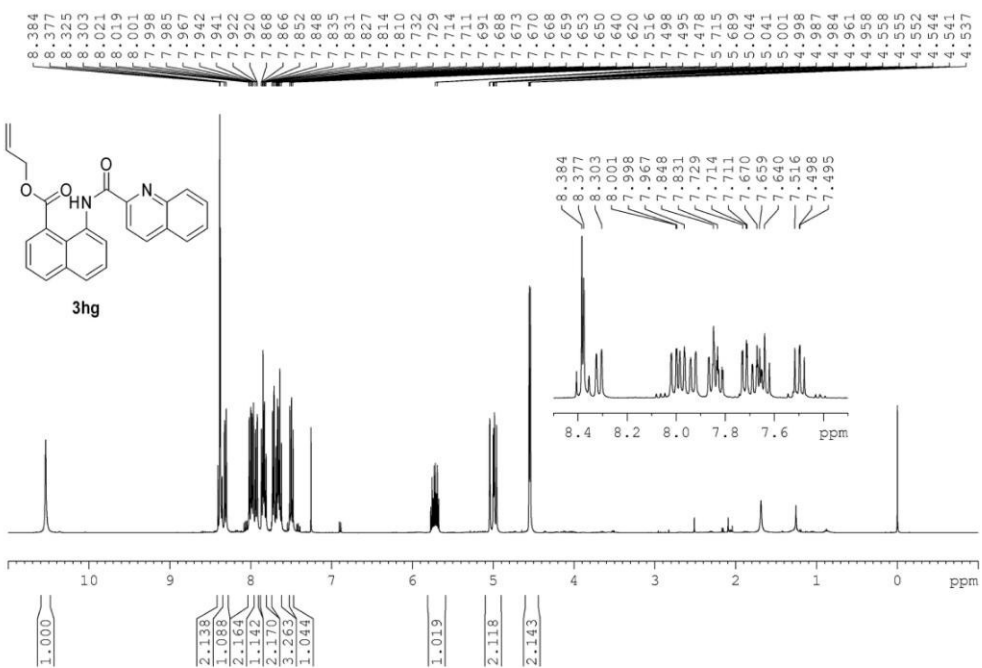

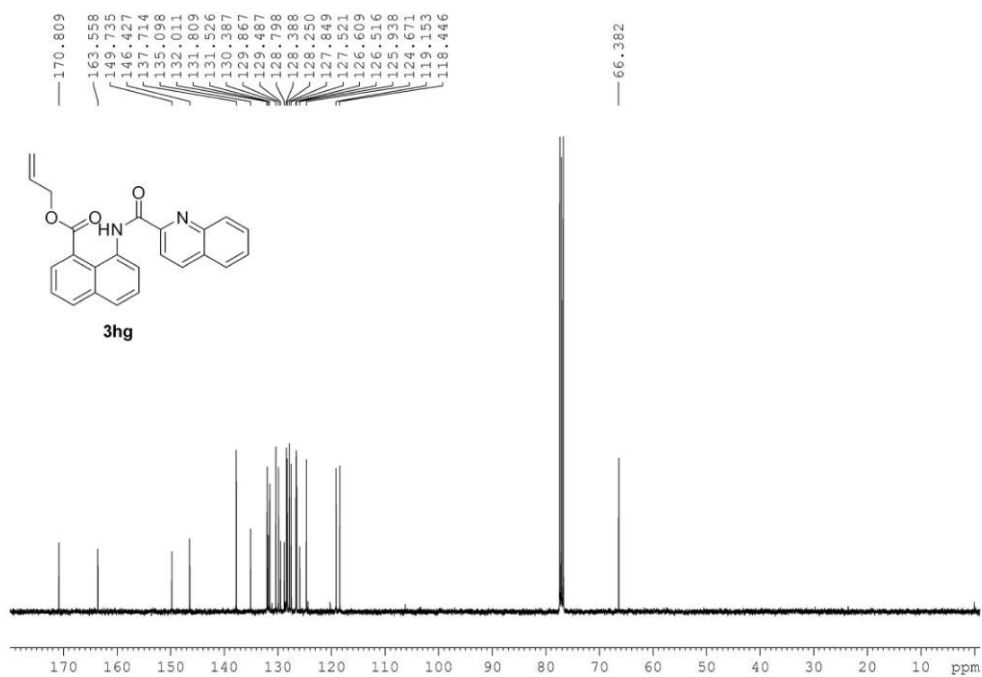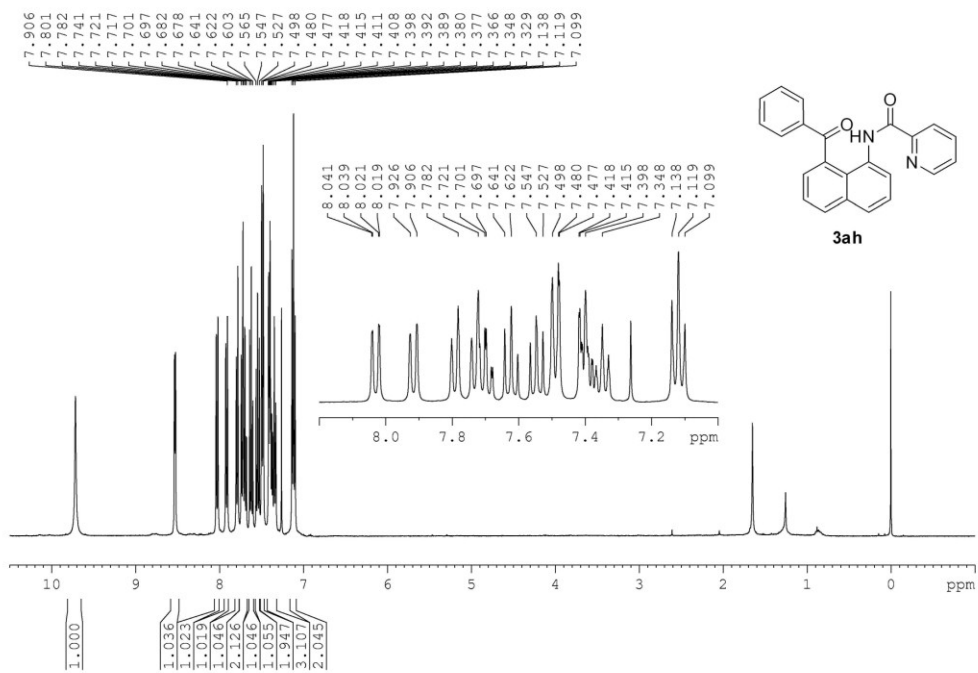

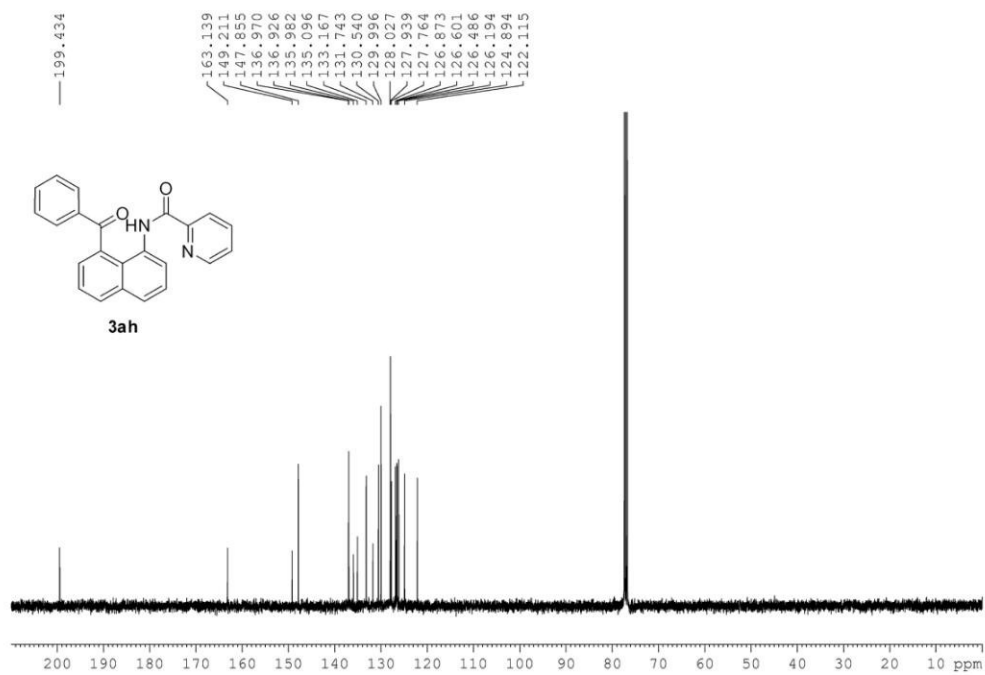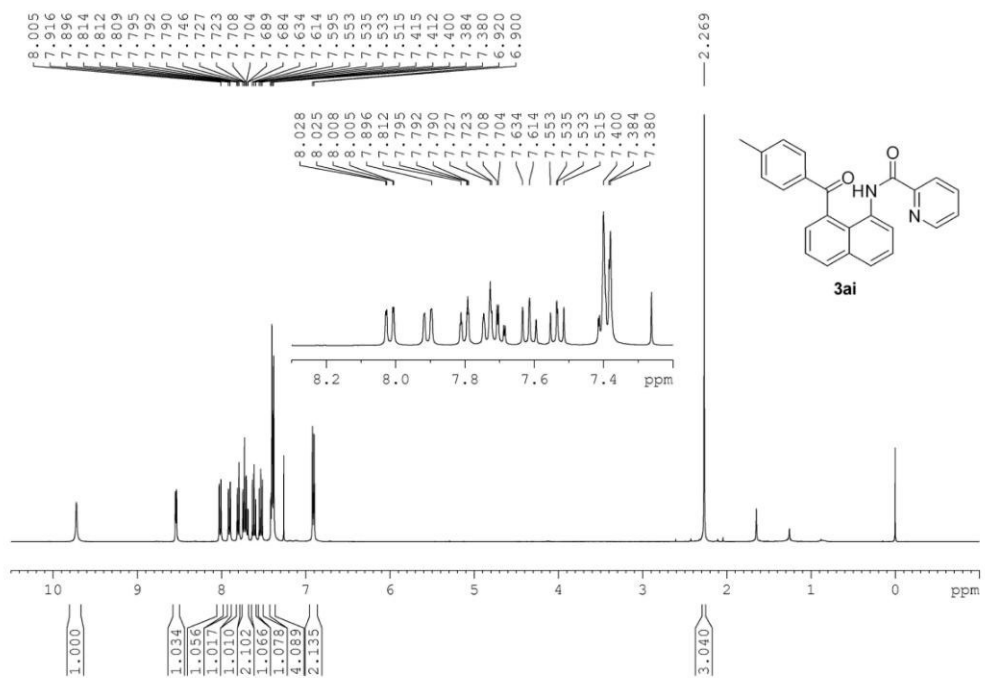

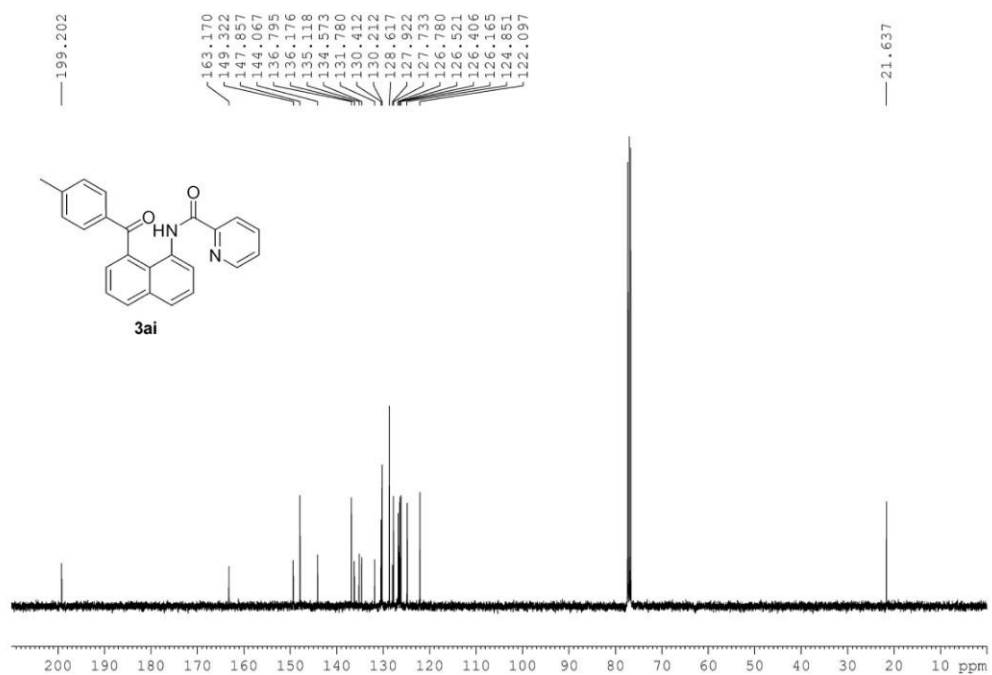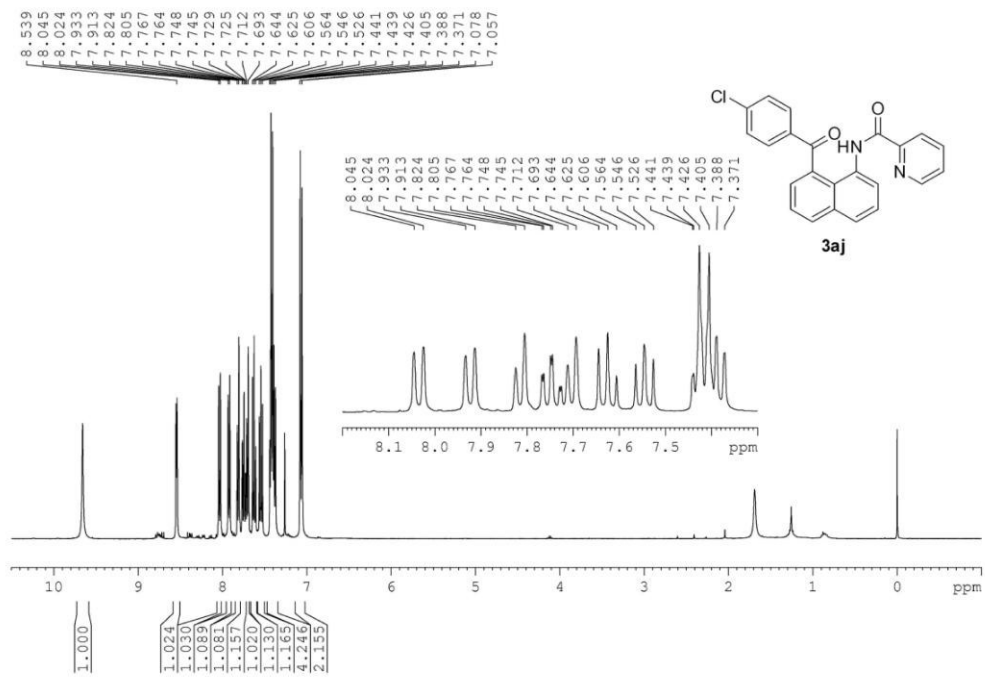



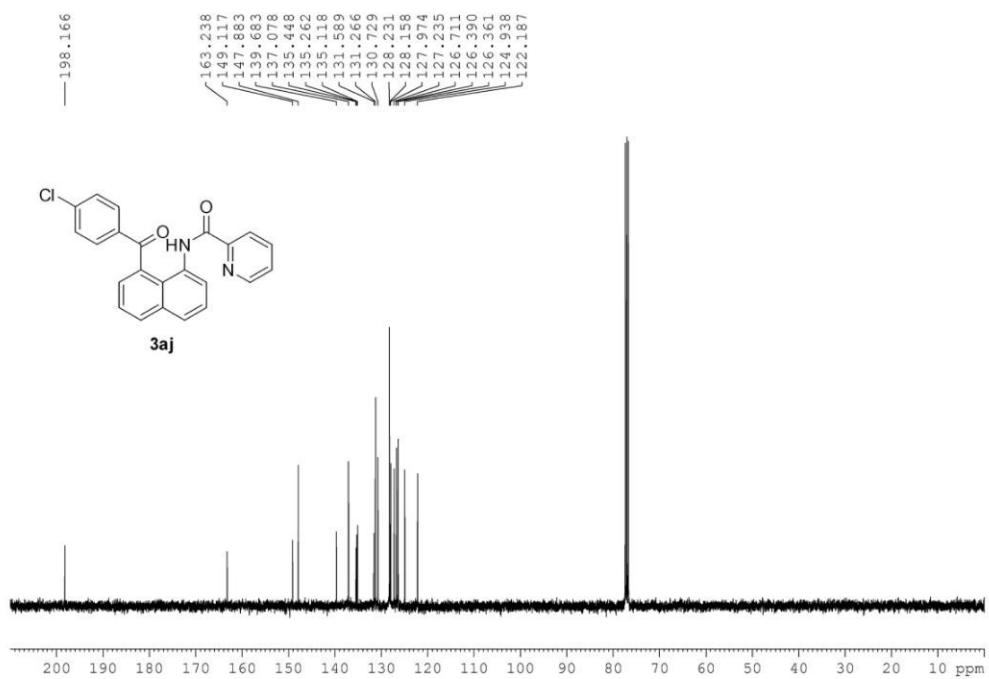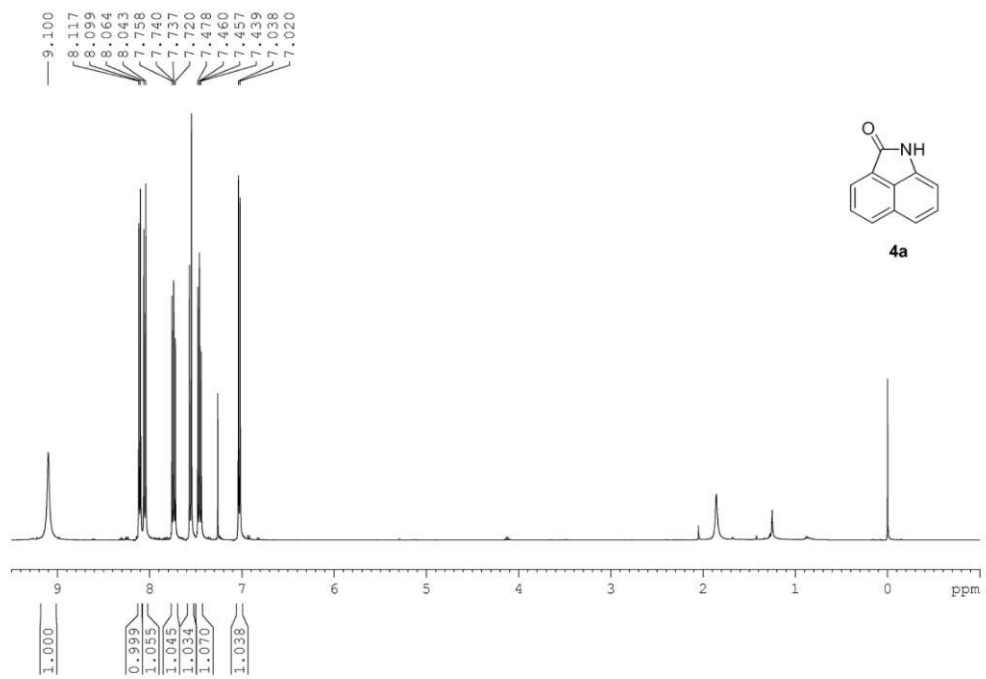

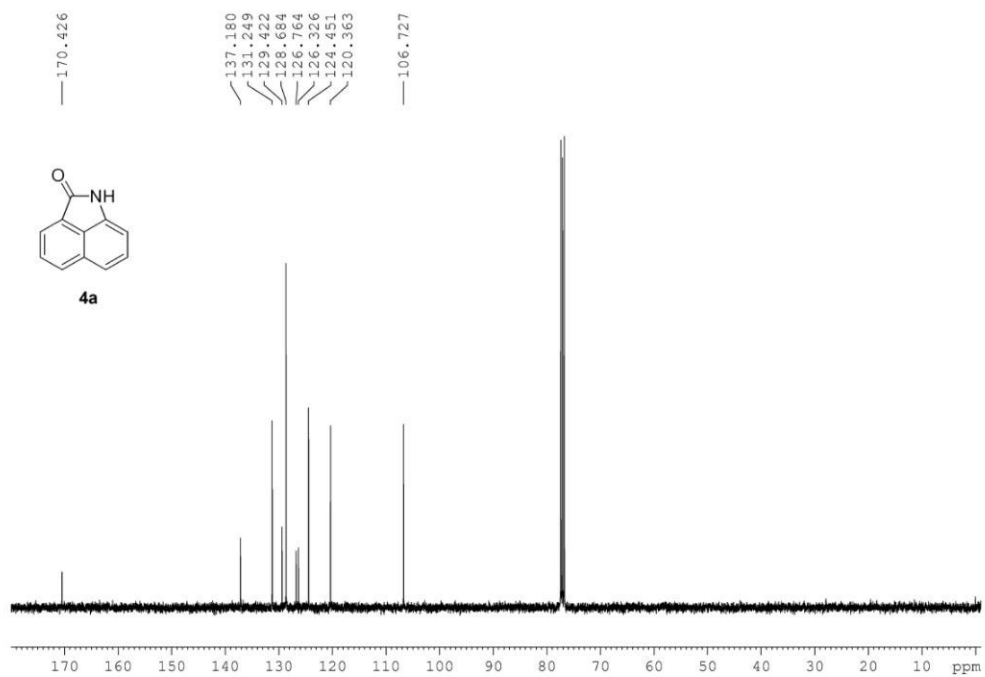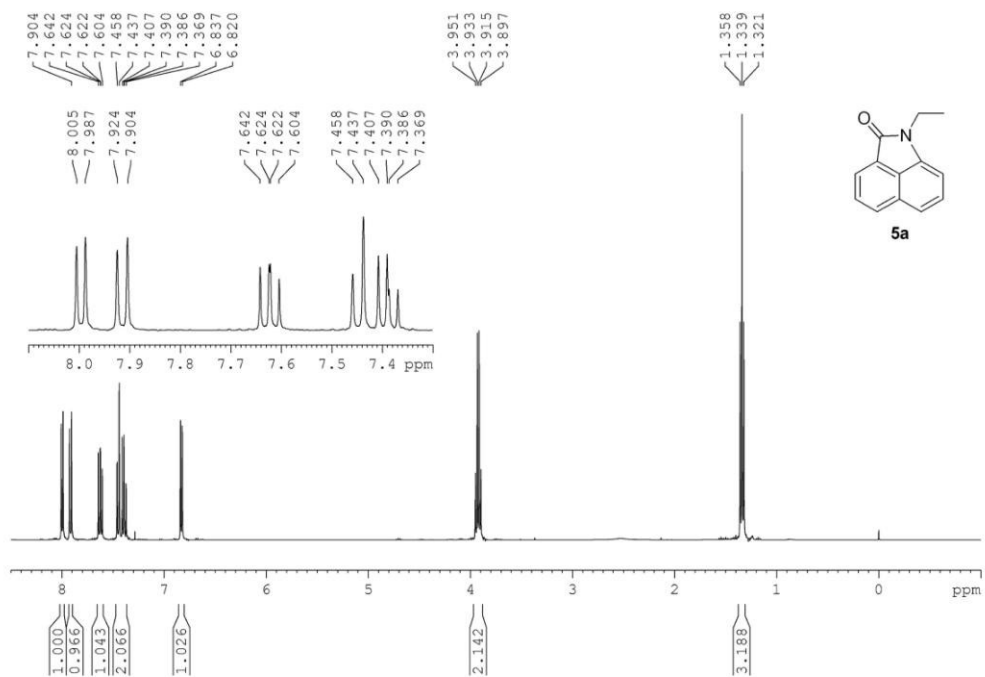

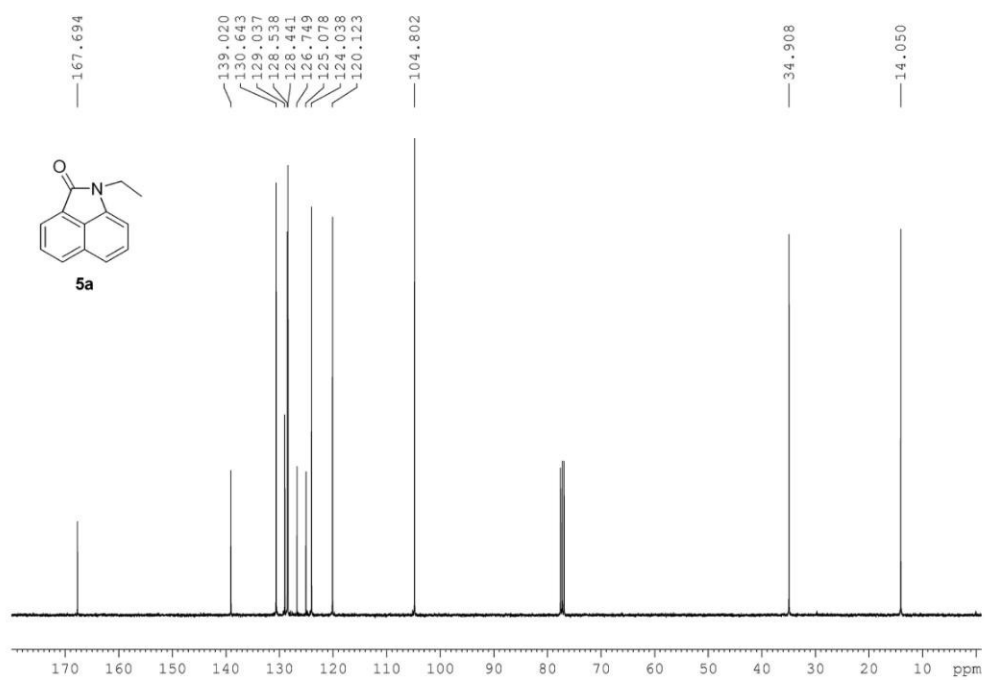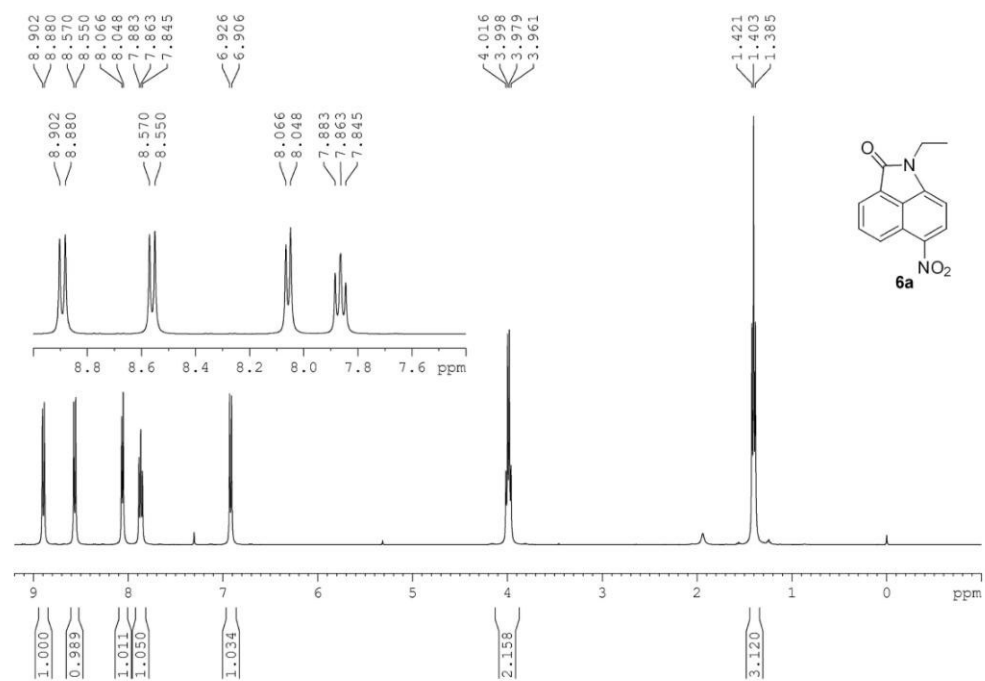

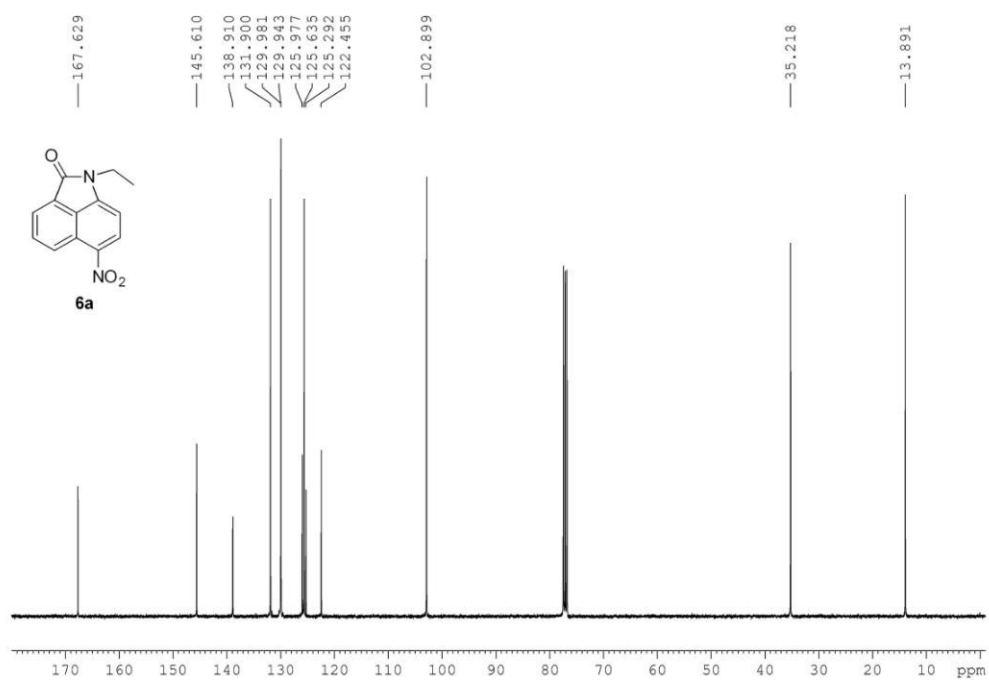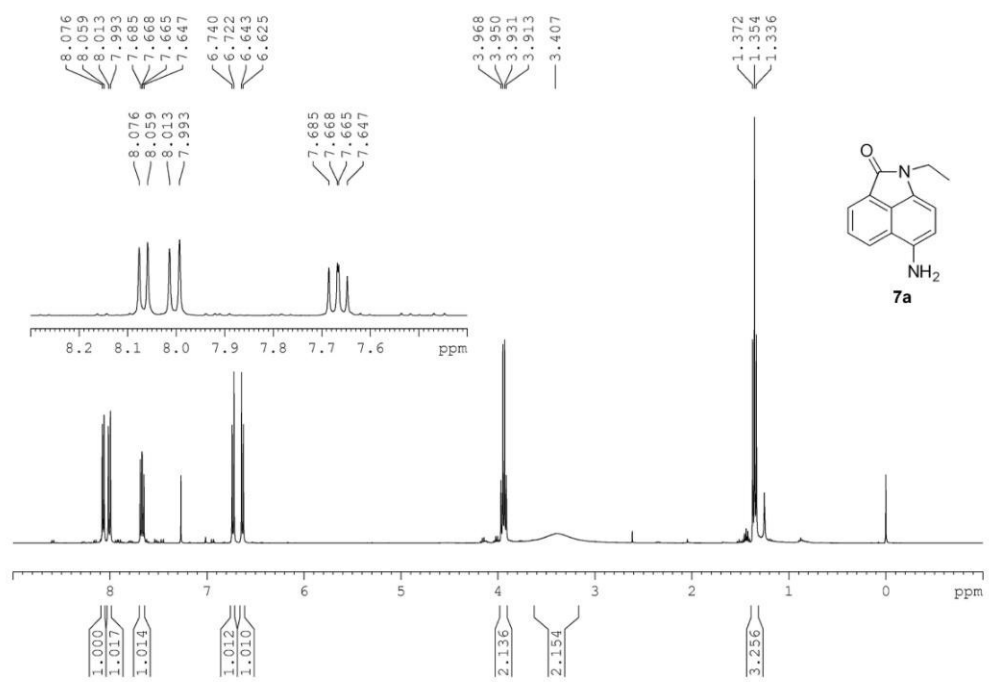

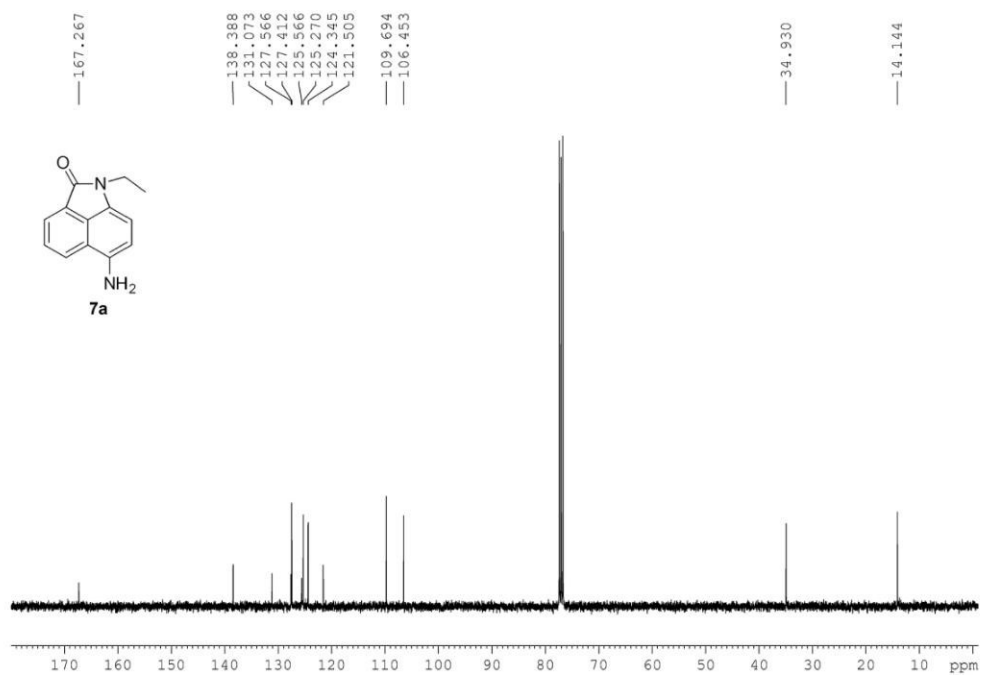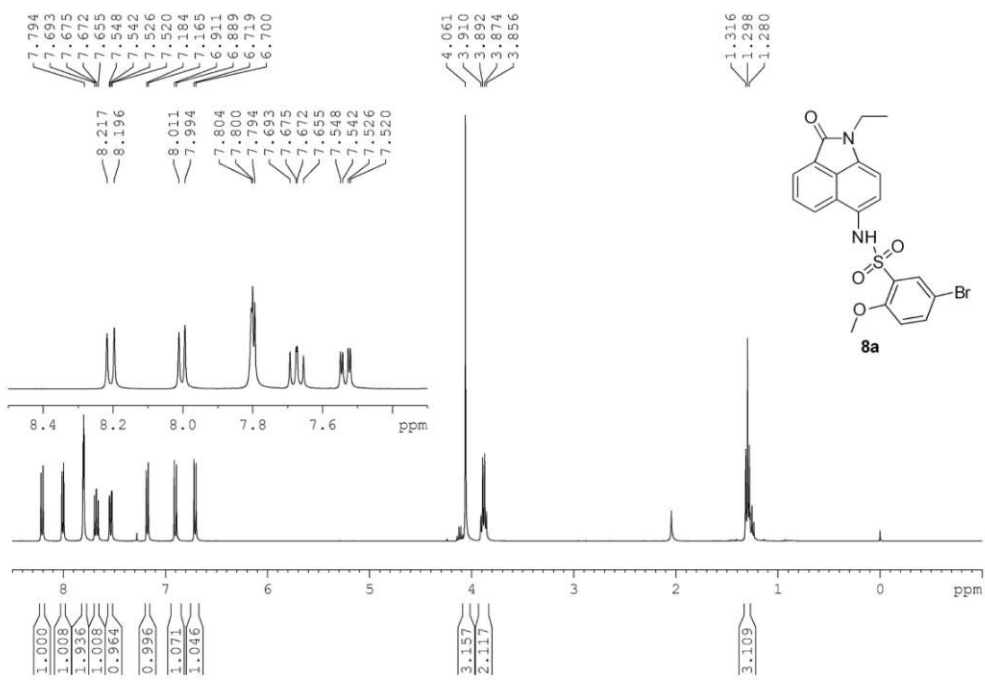

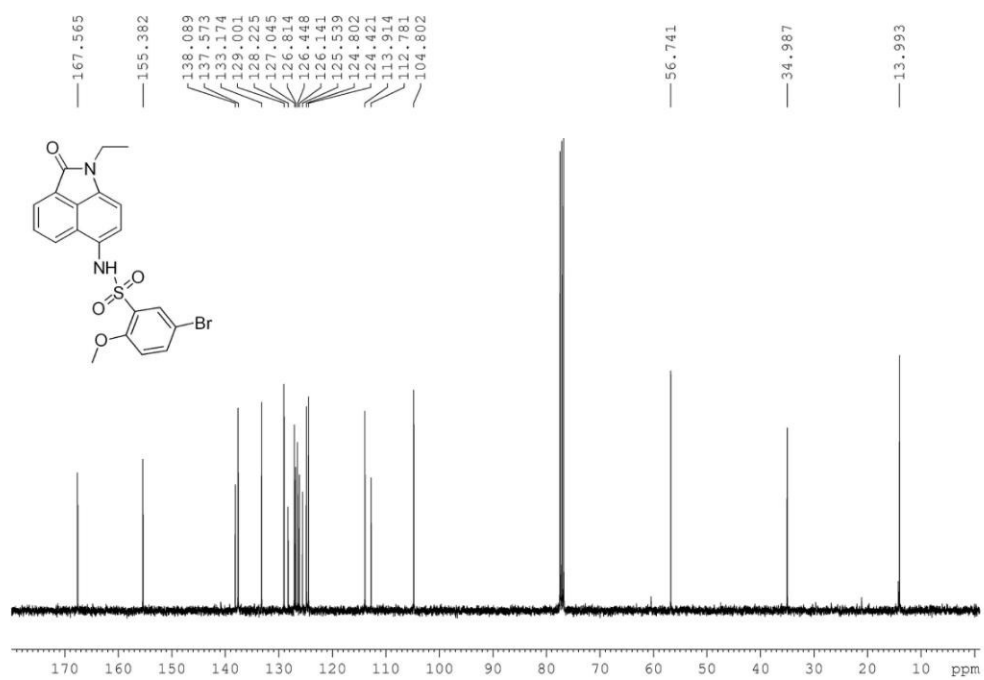

Supplement: d0ob00586j1.pdf [file d0ob00586j1.pdf]
